# Supplementary material
Source: publisher site journal article supplement (https://www.spandidos-publications.com/4245/downloadSupplementary)
Supplement: Supplementary file 1 [file downloadSupplementary]

## Sheet: Sheet1
Table SII. Differentially expressed lncRNAs resulting from the different subtype comparison vs. all subtypes such as, T-ALL vs. B-ALL, Hyperploidy, ETV6-RUNX1, NOTCH, KMT2A different rearrangement subtypes, KMT2A infant, DUX4 like, BCR-ABL like, HH, TAL1, TLX, NOTCH vs. other subtypes and E2A-PBX1 vs. BCR-ABL subtype for the articles which met inclusion criteria.
LncRNA	Ensemble code	Expression	Comparison	Reference
uc.112		up	T-ALL vs. B-ALL	Chagas et al. 2020 (28)
uc.112		up	Hiperploidy vs. other subtypes	Chagas et al. 2020
TCL6	ENSG00000187621	up	ETV6-RUNX1 vs. other subtypes	Cuadros et al. 2019 (30)
RP4-697K14.3	ENSG00000230226	up	ETV6-RUNX1 vs. other subtypes	Cuadros et al. 2019
LOC100292680	ENSG00000249628	up	ETV6-RUNX1 vs. other subtypes	Cuadros et al. 2019
RP11-345I18.1	ENSG00000234041	up	ETV6-RUNX1 vs. other subtypes	Cuadros et al. 2019
LINC00599	ENSG00000253230	up	ETV6-RUNX1 vs. other subtypes	Cuadros et al. 2019
TRAF3IP2-AS1	ENSG00000231889	up	ETV6-RUNX1 vs. other subtypes	Cuadros et al. 2019
HOTAIR	ENSG00000228630	up	ETV6-RUNX1 vs. other subtypes	Cuadros et al. 2019
KDM5B-AS1	ENSG00000228288	up	ETV6-RUNX1 vs. other subtypes	Cuadros et al. 2019
LOC100131320	ENSG00000225449	up	ETV6-RUNX1 vs. other subtypes	Cuadros et al. 2019
AC103563.9	ENSG00000231062	up	ETV6-RUNX1 vs. other subtypes	Cuadros et al. 2019
FLI1-AS1	ENSG00000254703	up	ETV6-RUNX1 vs. other subtypes	Cuadros et al. 2019
CRNDE	ENSG00000245694	up	ETV6-RUNX1 vs. other subtypes	Cuadros et al. 2019
BC045725	ENSG00000236778	up	ETV6-RUNX1 vs. other subtypes	Cuadros et al. 2019
IFNG-AS1	ENSG00000255733	up	ETV6-RUNX1 vs. other subtypes	Cuadros et al. 2019
RP11-69I8.3	ENSG00000227220	up	ETV6-RUNX1 vs. other subtypes	Cuadros et al. 2019
LOC100505648	ENSG00000245849	up	ETV6-RUNX1 vs. other subtypes	Cuadros et al. 2019
MGC39372	ENSG00000230438	up	ETV6-RUNX1 vs. other subtypes	Cuadros et al. 2019
RP11-119F7.5	ENSG00000260400	up	ETV6-RUNX1 vs. other subtypes	Cuadros et al. 2019
RP1-290I10.3	ENSG00000228478	up	ETV6-RUNX1 vs. other subtypes	Cuadros et al. 2019
RP1-159A19.4	ENSG00000237429	up	ETV6-RUNX1 vs. other subtypes	Cuadros et al. 2019
XLOC_013290	ENSG00000276631	up	ETV6-RUNX1 vs. other subtypes	Cuadros et al. 2019
AK055323		up	ETV6-RUNX1 vs. other subtypes	Cuadros et al. 2019
RP11-62L18.3	ENSG00000223432	up	ETV6-RUNX1 vs. other subtypes	Cuadros et al. 2019
CTD-2339L15.1 (RAD51-AS1)	ENSG00000245849	up	ETV6-RUNX1 vs. other subtypes	Cuadros et al. 2019
XLOC_014219		up	ETV6-RUNX1 vs. other subtypes	Cuadros et al. 2019
MGC23284	ENSG00000260630	up	ETV6-RUNX1 vs. other subtypes	Cuadros et al. 2019
OIP5-AS1	ENSG00000247556	up	ETV6-RUNX1 vs. other subtypes	Cuadros et al. 2019
CD27-AS1	ENSG00000215039	up	ETV6-RUNX1 vs. other subtypes	Cuadros et al. 2019
CTD-2012K14.7	ENSG00000259804	up	ETV6-RUNX1 vs. other subtypes	Cuadros et al. 2019
RP11-452H21.4 (LINC02728)	ENSG00000251323	up	ETV6-RUNX1 vs. other subtypes	Cuadros et al. 2019
HOTAIRM1	ENSG00000233429	up	ETV6-RUNX1 vs. other subtypes	Cuadros et al. 2019
AK097853/	ENSG00000283215	up	ETV6-RUNX1 vs. other subtypes	Cuadros et al. 2019
RP11-9G1.3	ENSG00000250241	up	ETV6-RUNX1 vs. other subtypes	Cuadros et al. 2019
AK021888		up	ETV6-RUNX1 vs. other subtypes	Cuadros et al. 2019
CCDC26	ENSG00000229140	down	ETV6-RUNX1 vs. other subtypes	Cuadros et al. 2019
AC007283.4	ENSG00000235579	down	ETV6-RUNX1 vs. other subtypes	Cuadros et al. 2019
RP11-463H12.1	ENSG00000244422	down	ETV6-RUNX1 vs. other subtypes	Cuadros et al. 2019
AK095221	ENSG00000269243	down	ETV6-RUNX1 vs. other subtypes	Cuadros et al. 2019
RP11-561B11.1	ENSG00000240023	down	ETV6-RUNX1 vs. other subtypes	Cuadros et al. 2019
RP11-135F9.1	ENSG00000214203	down	ETV6-RUNX1 vs. other subtypes	Cuadros et al. 2019
RP11-371E8.2/CYB5AP3	ENSG00000258595	down	ETV6-RUNX1 vs. other subtypes	Cuadros et al. 2019
RP1-151B14.9	ENSG00000226233	down	ETV6-RUNX1 vs. other subtypes	Cuadros et al. 2019
CTC-251H24.1	ENSG00000241464	down	ETV6-RUNX1 vs. other subtypes	Cuadros et al. 2019
RP11-204K16.1	ENSG00000240210	down	ETV6-RUNX1 vs. other subtypes	Cuadros et al. 2019
RPL21P121	ENSG00000237382	down	ETV6-RUNX1 vs. other subtypes	Cuadros et al. 2019
RP11-402L11.1	ENSG00000242936	down	ETV6-RUNX1 vs. other subtypes	Cuadros et al. 2019
RP11-500B12.2	ENSG00000235133	down	ETV6-RUNX1 vs. other subtypes	Cuadros et al. 2019
HAR1A	ENSG00000225978	down	ETV6-RUNX1 vs. other subtypes	Cuadros et al. 2019
EIF4A1P11	ENSG00000231564	down	ETV6-RUNX1 vs. other subtypes	Cuadros et al. 2019
AC017078.1	ENSG00000233829	down	ETV6-RUNX1 vs. other subtypes	Cuadros et al. 2019
AP000343.1	ENSG00000214526	down	ETV6-RUNX1 vs. other subtypes	Cuadros et al. 2019
AP000593.6	ENSG00000213365	down	ETV6-RUNX1 vs. other subtypes	Cuadros et al. 2019
AC079354.6	ENSG00000224463	down	ETV6-RUNX1 vs. other subtypes	Cuadros et al. 2019
CTB-75G16.1		down	ETV6-RUNX1 vs. other subtypes	Cuadros et al. 2019
D28359		down	ETV6-RUNX1 vs. other subtypes	Cuadros et al. 2019
LOC729683	ENSG00000279369	down	ETV6-RUNX1 vs. other subtypes	Cuadros et al. 2019
EIF4A1P3	ENSG00000231018	down	ETV6-RUNX1 vs. other subtypes	Cuadros et al. 2019
AC016700.6	ENSG00000231414	down	ETV6-RUNX1 vs. other subtypes	Cuadros et al. 2019
RP1-199H16.6	ENSG00000224279	down	ETV6-RUNX1 vs. other subtypes	Cuadros et al. 2019
CTC-327F10.3	ENSG00000250346	down	ETV6-RUNX1 vs. other subtypes	Cuadros et al. 2019
DLG3-AS1	ENSG00000231651	down	ETV6-RUNX1 vs. other subtypes	Cuadros et al. 2019
RP11-52I18.1	ENSG00000223450	down	ETV6-RUNX1 vs. other subtypes	Cuadros et al. 2019
RPL7AP33	ENSG00000254200	down	ETV6-RUNX1 vs. other subtypes	Cuadros et al. 2019
RP11-1149O23.1	ENSG00000243265	down	ETV6-RUNX1 vs. other subtypes	Cuadros et al. 2019
AC008753.3	ENSG00000238150	down	ETV6-RUNX1 vs. other subtypes	Cuadros et al. 2019
RP11-226F19.1	ENSG00000242293	down	ETV6-RUNX1 vs. other subtypes	Cuadros et al. 2019
AC073342.12	ENSG00000231840	down	ETV6-RUNX1 vs. other subtypes	Cuadros et al. 2019
XLOC_008033	ENSG00000233071	down	ETV6-RUNX1 vs. other subtypes	Cuadros et al. 2019
HINT1P1	ENSG00000231531	down	ETV6-RUNX1 vs. other subtypes	Cuadros et al. 2019
RPS15AP16	ENSG00000239483	down	ETV6-RUNX1 vs. other subtypes	Cuadros et al. 2019
GAS5	ENSG00000234741	down	ETV6-RUNX1 vs. other subtypes	Cuadros et al. 2019
RP11-328C8.4	ENSG00000257225	down	ETV6-RUNX1 vs. other subtypes	Cuadros et al. 2019
AC007563.4	ENSG00000237930	down	ETV6-RUNX1 vs. other subtypes	Cuadros et al. 2019
RP3-455J7.3	ENSG00000231029	down	ETV6-RUNX1 vs. other subtypes	Cuadros et al. 2019
RPL39P6	ENSG00000238173	down	ETV6-RUNX1 vs. other subtypes	Cuadros et al. 2019
EIF4A1P7	ENSG00000235472	down	ETV6-RUNX1 vs. other subtypes	Cuadros et al. 2019
RP11-91I11.1	ENSG00000229067	down	ETV6-RUNX1 vs. other subtypes	Cuadros et al. 2019
RP11-304L19.5/ SNHG19	ENSG00000260260	down	ETV6-RUNX1 vs. other subtypes	Cuadros et al. 2019
PXN-AS1	ENSG00000255857	down	ETV6-RUNX1 vs. other subtypes	Cuadros et al. 2019
AC093673.5	ENSG00000232533	down	ETV6-RUNX1 vs. other subtypes	Cuadros et al. 2019
KB-1205A7.1	ENSG00000254112	down	ETV6-RUNX1 vs. other subtypes	Cuadros et al. 2019
RP11-170J3.2	ENSG00000228657	down	ETV6-RUNX1 vs. other subtypes	Cuadros et al. 2019
RP11-254B13.3	ENSG00000234925	down	ETV6-RUNX1 vs. other subtypes	Cuadros et al. 2019
AC016734.2	ENSG00000228305	down	ETV6-RUNX1 vs. other subtypes	Cuadros et al. 2019
RP11-692E14.1	ENSG00000248376	down	ETV6-RUNX1 vs. other subtypes	Cuadros et al. 2019
RP11-314A20.1	ENSG00000213939	down	ETV6-RUNX1 vs. other subtypes	Cuadros et al. 2019
RPL21P122	ENSG00000241185	down	ETV6-RUNX1 vs. other subtypes	Cuadros et al. 2019
AC055811.5	ENSG00000226359	down	ETV6-RUNX1 vs. other subtypes	Cuadros et al. 2019
RP11-402G3.4	ENSG00000230284	down	ETV6-RUNX1 vs. other subtypes	Cuadros et al. 2019
RP1-130G2.1	ENSG00000229700	down	ETV6-RUNX1 vs. other subtypes	Cuadros et al. 2019
AC008073.6		down	ETV6-RUNX1 vs. other subtypes	Cuadros et al. 2019
RP3-405J24.1	ENSG00000216412	down	ETV6-RUNX1 vs. other subtypes	Cuadros et al. 2019
RPL7AP65	ENSG00000228000	down	ETV6-RUNX1 vs. other subtypes	Cuadros et al. 2019
AC010761.9	ENSG00000265474	down	ETV6-RUNX1 vs. other subtypes	Cuadros et al. 2019
EPR-1		down	ETV6-RUNX1 vs. other subtypes	Cuadros et al. 2019
YBX1P9	ENSG00000236994	down	ETV6-RUNX1 vs. other subtypes	Cuadros et al. 2019
CTA-215D11.4	ENSG00000232848	down	ETV6-RUNX1 vs. other subtypes	Cuadros et al. 2019
RP5-817C23.1	ENSG00000232048	down	ETV6-RUNX1 vs. other subtypes	Cuadros et al. 2019
RP4-604A21.1	ENSG00000225616	down	ETV6-RUNX1 vs. other subtypes	Cuadros et al. 2019
AC007879.5	ENSG00000223725	down	ETV6-RUNX1 vs. other subtypes	Cuadros et al. 2019
RP11-312B8.2	ENSG00000227950	down	ETV6-RUNX1 vs. other subtypes	Cuadros et al. 2019
UQCRHP2	ENSG00000237629	down	ETV6-RUNX1 vs. other subtypes	Cuadros et al. 2019
XLOC_007094	ENSG00000251396	down	ETV6-RUNX1 vs. other subtypes	Cuadros et al. 2019
RPL24P4	ENSG00000181524	down	ETV6-RUNX1 vs. other subtypes	Cuadros et al. 2019
RP11-452K12.3	ENSG00000237169	down	ETV6-RUNX1 vs. other subtypes	Cuadros et al. 2019
RP11-64J19.1/EIF1P5	ENSG00000266563	down	ETV6-RUNX1 vs. other subtypes	Cuadros et al. 2019
RPL7P4	ENSG00000230449	down	ETV6-RUNX1 vs. other subtypes	Cuadros et al. 2019
CASP1P1	ENSG00000255430	down	ETV6-RUNX1 vs. other subtypes	Cuadros et al. 2019
RP11-359M6.3	ENSG00000257956	down	ETV6-RUNX1 vs. other subtypes	Cuadros et al. 2019
RPL23AP73	ENSG00000244283	down	ETV6-RUNX1 vs. other subtypes	Cuadros et al. 2019
SNHG5	ENSG00000203875	down	ETV6-RUNX1 vs. other subtypes	Cuadros et al. 2019
RPL17P20	ENSG00000241250	down	ETV6-RUNX1 vs. other subtypes	Cuadros et al. 2019
RP11-461O14.1	ENSG00000241458	down	ETV6-RUNX1 vs. other subtypes	Cuadros et al. 2019
RP13-93L13.2	ENSG00000231799	down	ETV6-RUNX1 vs. other subtypes	Cuadros et al. 2019
XLOC_002080		down	ETV6-RUNX1 vs. other subtypes	Cuadros et al. 2019
AC013404.1	ENSG00000231017	down	ETV6-RUNX1 vs. other subtypes	Cuadros et al. 2019
AC011816.4	ENSG00000224858	down	ETV6-RUNX1 vs. other subtypes	Cuadros et al. 2019
LUNAR1	ENSG00000278090	up	NOTCH vs. other subtypes	Durinck et al. 2014 (31)
lnc-SYNCRIP-2	ENSG00000203875	up	NOTCH vs. other subtypes	Durinck et al. 2014
lnc-­SLC12A7-­4	ENSG00000215246	down	NOTCH vs. other subtypes	Durinck et al. 2014
lnc-PLEKHB2-1	ENSG00000223631	up	NOTCH vs. other subtypes	Durinck et al. 2014
lnc-c2orf55-1	ENSG00000226791	up	NOTCH vs. other subtypes	Durinck et al. 2014
lnc-UBXN4-1	ENSG00000226806	up	NOTCH vs. other subtypes	Durinck et al. 2014
lnc-PGBD5-2	ENSG00000227006	up	NOTCH vs. other subtypes	Durinck et al. 2014
lnc-FAM120AOS-1	ENSG00000237385	up	NOTCH vs. other subtypes	Durinck et al. 2014
lnc-COX10-1	ENSG00000266378	up	NOTCH vs. other subtypes	Durinck et al. 2014
lnc-SERPINC1-1	ENSG00000234741	up	NOTCH vs. other subtypes	Durinck et al. 2014
lnc-c9orf163-2	ENSG00000237886	up	NOTCH vs. other subtypes	Durinck et al. 2014
lnc-GSDMC-2	ENSG00000229140	up	NOTCH vs. other subtypes	Durinck et al. 2014
lnc-PKD1-1	ENSG00000260260	up	NOTCH vs. other subtypes	Durinck et al. 2014
lnc-CA7-2	ENSG00000261088	up	NOTCH vs. other subtypes	Durinck et al. 2014
lnc-GAN-1		up	NOTCH vs. other subtypes	Durinck et al. 2014
lnc-CA7-1	ENSG00000261705	up	NOTCH vs. other subtypes	Durinck et al. 2014
AK024545		down	KMT2A vs. other subtypes	Fang et al. 2014 (32)
NR_024046	ENSG00000236409	down	KMT2A vs. other subtypes	Fang et al. 2014
AK125710		down	KMT2A vs. other subtypes	Fang et al. 2014
ENST00000419428	ENSG00000226822	down	KMT2A vs. other subtypes	Fang et al. 2014
AK024867		down	KMT2A vs. other subtypes	Fang et al. 2014
EL585127		down	KMT2A vs. other subtypes	Fang et al. 2014
BE551986		down	KMT2A vs. other subtypes	Fang et al. 2014
CR933607		down	KMT2A vs. other subtypes	Fang et al. 2014
uc003wpj.1	ENSG00000237647	down	KMT2A vs. other subtypes	Fang et al. 2014
NR_027036	ENSG00000231711	down	KMT2A vs. other subtypes	Fang et al. 2014
BC046120		down	KMT2A vs. other subtypes	Fang et al. 2014
AK_125349		down	KMT2A vs. other subtypes	Fang et al. 2014
NR_029389	ENSG00000267053	down	KMT2A vs. other subtypes	Fang et al. 2014
uc001mkl.1		down	KMT2A vs. other subtypes	Fang et al. 2014
ENST00000454882	ENSG00000233064	down	KMT2A vs. other subtypes	Fang et al. 2014
ENST00000429048	ENSG00000235196	down	KMT2A vs. other subtypes	Fang et al. 2014
NR_026844	ENSG00000214262	down	KMT2A vs. other subtypes	Fang et al. 2014
uc002trf.1	ENSG00000178162	down	KMT2A vs. other subtypes	Fang et al. 2014
NR_015368	ENSG00000228794	down	KMT2A vs. other subtypes	Fang et al. 2014
ENST00000450834	ENSG00000237036	down	KMT2A vs. other subtypes	Fang et al. 2014
AF056433		down	KMT2A vs. other subtypes	Fang et al. 2014
AK092456		down	KMT2A vs. other subtypes	Fang et al. 2014
AL157484		down	KMT2A vs. other subtypes	Fang et al. 2014
BC071777		down	KMT2A vs. other subtypes	Fang et al. 2014
AK126625		down	KMT2A vs. other subtypes	Fang et al. 2014
ENST00000417801	ENSG00000230945	down	KMT2A vs. other subtypes	Fang et al. 2014
NR_024245		down	KMT2A vs. other subtypes	Fang et al. 2014
BC032569		down	KMT2A vs. other subtypes	Fang et al. 2014
AK095308		down	KMT2A vs. other subtypes	Fang et al. 2014
		down	KMT2A vs. other subtypes	Fang et al. 2014
ENST00000505608	ENSG00000248659	down	KMT2A vs. other subtypes	Fang et al. 2014
uc002awb.1		down	KMT2A vs. other subtypes	Fang et al. 2014
uc003che.2		down	KMT2A vs. other subtypes	Fang et al. 2014
AI218855		down	KMT2A vs. other subtypes	Fang et al. 2014
NR_026971	ENSG00000245105	down	KMT2A vs. other subtypes	Fang et al. 2014
AK057130		down	KMT2A vs. other subtypes	Fang et al. 2014
ENST00000504219	ENSG00000231160	down	KMT2A vs. other subtypes	Fang et al. 2014
ENST00000438770	ENSG00000226686	down	KMT2A vs. other subtypes	Fang et al. 2014
AK026868		down	KMT2A vs. other subtypes	Fang et al. 2014
AK125538		down	KMT2A vs. other subtypes	Fang et al. 2014
AK090762		down	KMT2A vs. other subtypes	Fang et al. 2014
BC035666		down	KMT2A vs. other subtypes	Fang et al. 2014
AK026295		down	KMT2A vs. other subtypes	Fang et al. 2014
ENST00000438746		down	KMT2A vs. other subtypes	Fang et al. 2014
ENST00000416534	ENSG00000226506	down	KMT2A vs. other subtypes	Fang et al. 2014
ENST00000463183	ENSG00000242516	down	KMT2A vs. other subtypes	Fang et al. 2014
ENST00000499522	ENSG00000247081	down	KMT2A vs. other subtypes	Fang et al. 2014
uc003ebh.1		down	KMT2A vs. other subtypes	Fang et al. 2014
HIT000217202		down	KMT2A vs. other subtypes	Fang et al. 2014
CR601496		down	KMT2A vs. other subtypes	Fang et al. 2014
NR_022157		down	KMT2A vs. other subtypes	Fang et al. 2014
ENST00000479102	ENSG00000228960	down	KMT2A vs. other subtypes	Fang et al. 2014
NR_026804	ENSG00000231160	down	KMT2A vs. other subtypes	Fang et al. 2014
ENST00000430618		down	KMT2A vs. other subtypes	Fang et al. 2014
U85044		down	KMT2A vs. other subtypes	Fang et al. 2014
AF080092		down	KMT2A vs. other subtypes	Fang et al. 2014
ENST00000501122	ENSG00000245532	down	KMT2A vs. other subtypes	Fang et al. 2014
AL117578		down	KMT2A vs. other subtypes	Fang et al. 2014
AX721088		down	KMT2A vs. other subtypes	Fang et al. 2014
AL137436		up	KMT2A vs. other subtypes	Fang et al. 2014
ENST00000402896	ENSG00000219776	up	KMT2A vs. other subtypes	Fang et al. 2014
AY927579		up	KMT2A vs. other subtypes	Fang et al. 2014
ENST00000448265		up	KMT2A vs. other subtypes	Fang et al. 2014
ENST00000416089	ENSG00000231147	up	KMT2A vs. other subtypes	Fang et al. 2014
CR595807		up	KMT2A vs. other subtypes	Fang et al. 2014
AK095104		up	KMT2A vs. other subtypes	Fang et al. 2014
BC047080		up	KMT2A vs. other subtypes	Fang et al. 2014
ENST00000413525	ENSG00000232606	up	KMT2A vs. other subtypes	Fang et al. 2014
ENST00000454595	ENSG00000230749	up	KMT2A vs. other subtypes	Fang et al. 2014
uc001vey.2		up	KMT2A vs. other subtypes	Fang et al. 2014
BC071787		up	KMT2A vs. other subtypes	Fang et al. 2014
ENST00000418618		up	KMT2A vs. other subtypes	Fang et al. 2014
NR_027085	ENSG00000284543	up	KMT2A vs. other subtypes	Fang et al. 2014
ENST00000445502	ENSG00000228874	up	KMT2A vs. other subtypes	Fang et al. 2014
ENST00000446333	ENSG00000229191	up	KMT2A vs. other subtypes	Fang et al. 2014
AK092378		up	KMT2A vs. other subtypes	Fang et al. 2014
ENST00000422823	ENSG00000224172	up	KMT2A vs. other subtypes	Fang et al. 2014
CR611122		up	KMT2A vs. other subtypes	Fang et al. 2014
ENST00000393967		up	KMT2A vs. other subtypes	Fang et al. 2014
uc001ass.1		up	KMT2A vs. other subtypes	Fang et al. 2014
ENST00000443469	ENSG00000225988	up	KMT2A vs. other subtypes	Fang et al. 2014
uc010jns.1		up	KMT2A vs. other subtypes	Fang et al. 2014
ENST00000432488	ENSG00000235492	up	KMT2A vs. other subtypes	Fang et al. 2014
NR_024154		up	KMT2A vs. other subtypes	Fang et al. 2014
ENST00000514850	ENSG00000250464	up	KMT2A vs. other subtypes	Fang et al. 2014
AK094447		up	KMT2A vs. other subtypes	Fang et al. 2014
uc003kjn.1	ENSG00000248309	up	KMT2A vs. other subtypes	Fang et al. 2014
NR_026865	ENSG00000182648	up	KMT2A vs. other subtypes	Fang et al. 2014
uc.19+		up	KMT2A vs. other subtypes	Fang et al. 2014
AB058771		up	KMT2A vs. other subtypes	Fang et al. 2014
ENST00000399869	ENSG00000215246	up	KMT2A vs. other subtypes	Fang et al. 2014
uc003jbs.1		up	KMT2A vs. other subtypes	Fang et al. 2014
ENST00000435695	ENSG00000237819	up	KMT2A vs. other subtypes	Fang et al. 2014
ENST00000440492	ENSG00000233975	up	KMT2A vs. other subtypes	Fang et al. 2014
NR_033375	ENSG00000276210	up	KMT2A vs. other subtypes	Fang et al. 2014
nc-HOXA6-72		up	KMT2A vs. other subtypes	Fang et al. 2014
AW361687		up	KMT2A vs. other subtypes	Fang et al. 2014
ENST00000437867	ENSG00000227258	up	KMT2A vs. other subtypes	Fang et al. 2014
NR_002927		up	KMT2A vs. other subtypes	Fang et al. 2014
ENST00000425802	ENSG00000223390	up	KMT2A vs. other subtypes	Fang et al. 2014
AF086011		up	KMT2A vs. other subtypes	Fang et al. 2014
uc003fax.1		up	KMT2A vs. other subtypes	Fang et al. 2014
ucc001qek.2		up	KMT2A vs. other subtypes	Fang et al. 2014
BC040655		up	KMT2A vs. other subtypes	Fang et al. 2014
DN991958		up	KMT2A vs. other subtypes	Fang et al. 2014
ENST00000445535	ENSG00000225217	up	KMT2A vs. other subtypes	Fang et al. 2014
uc003hoi.2		up	KMT2A vs. other subtypes	Fang et al. 2014
ENST00000433764		up	KMT2A vs. other subtypes	Fang et al. 2014
uc002yrj.1		up	KMT2A vs. other subtypes	Fang et al. 2014
uc004aec.2		up	KMT2A vs. other subtypes	Fang et al. 2014
ENST00000417843	ENSG00000225411	up	KMT2A vs. other subtypes	Fang et al. 2014
uc001pfi.1	ENSG00000245552	up	KMT2A-AF4 t(4;11) vs. other subtypes	Fang et al. 2014
CR593212		up	KMT2A-AF4 t(4;11) vs. other subtypes	Fang et al. 2014
uc002.qbv.2		up	KMT2A-AF4 t(4;11) vs. Other subtypes	Fang et al. 2014
ENST00000508572	ENSG00000249413	up	KMT2A-AF4 t(4;11) vs. other subtypes	Fang et al. 2014
ENST00000483806	ENSG00000239736	up	KMT2A-AF4 t(4;11) vs. other subtypes	Fang et al. 2014
DA088898		up	KMT2A-AF4 t(4;11) vs. other subtypes	Fang et al. 2014
ENST00000492683	ENSG00000240708	up	KMT2A-AF4 t(4;11) vs. other subtypes	Fang et al. 2014
BC041955		down	KMT2A-AF4 t(4;11) vs. other subtypes	Fang et al. 2014
ENST00000508574		down	KMT2A-AF4 t(4;11) vs. other subtypes	Fang et al. 2014
uc002ybr.1		down	KMT2A-AF4 t(4;11) vs. other subtypes	Fang et al. 2014
uc002xml.1	ENSG00000132832	down	KMT2A-AF4 t(4;11) vs. other subtypes	Fang et al. 2014
ENST00000423803		down	KMT2A-AF4 t(4;11) vs. other subtypes	Fang et al. 2014
ENST00000428055	ENSG00000231331	down	KMT2A-AF4 t(4;11) vs. other subtypes	Fang et al. 2014
ENST00000417526	ENSG00000223688	down	KMT2A-AF4 t(4;11) vs. other subtypes	Fang et al. 2014
AK094730		up	KMT2A-ENL t(11;19) vs. other subtypes	Fang et al. 2014
uc001zfv.1	ENSG00000225930	up	KMT2A-ENL t(11;19) vs. other subtypes	Fang et al. 2014
uc003fxi.2		up	KMT2A-ENL t(11;19) vs. other subtypes	Fang et al. 2014
BC004287		up	KMT2A-ENL t(11;19) vs. other subtypes	Fang et al. 2014
uc001ixe.1		up	KMT2A-ENL t(11;19) vs. other subtypes	Fang et al. 2014
uc002ldh.2		up	KMT2A-ENL t(11;19) vs. other subtypes	Fang et al. 2014
ENST00000417526	ENSG00000223688	up	KMT2A-ENL t(11;19) vs. other subtypes	Fang et al. 2014
BC024020		down	KMT2A-ENL t(11;19) vs. other subtypes	Fang et al. 2014
NR_024428		down	KMT2A-ENL t(11;19) vs. other subtypes	Fang et al. 2014
lincRNA-TNFSF9		down	KMT2A-ENL t(11;19) vs. other subtypes	Fang et al. 2014
ENST00000426301	ENSG00000226067	down	KMT2A-ENL t(11;19) vs. other subtypes	Fang et al. 2014
NR_024431	ENSG00000224596	down	KMT2A-ENL t(11;19) vs. other subtypes	Fang et al. 2014
NR_024452	ENSG00000239332	down	KMT2A-ENL t(11;19) vs. other subtypes	Fang et al. 2014
ENST00000430733	ENSG00000227213	down	KMT2A-ENL t(11;19) vs. other subtypes	Fang et al. 2014
ENST00000426373	ENSG00000227462	up	KMT2A-AFP t(9;11) vs. other subtypes	Fang et al. 2014
ENST00000456660	ENSG00000235454	up	KMT2A-AFP t(9;11) vs. other subtypes	Fang et al. 2014
uc001wko.1	ENSG00000258727	up	KMT2A-AFP t(9;11) vs. other subtypes	Fang et al. 2014
uc003jod.1	ENSG00000248092	up	KMT2A-AFP t(9;11) vs. other subtypes	Fang et al. 2014
ENST00000392115	ENSG00000213065	up	KMT2A-AFP t(9;11) vs. other subtypes	Fang et al. 2014
ENST00000503269	ENSG00000249748	up	KMT2A-AFP t(9;11) vs. other subtypes	Fang et al. 2014
ENST00000340424	ENSG00000223750	up	KMT2A-AFP t(9;11) vs. other subtypes	Fang et al. 2014
NR_027256	ENSG00000184106	down	KMT2A-AFP t(9;11) vs. other subtypes	Fang et al. 2014
lincRNA-UNCX		down	KMT2A-AFP t(9;11) vs. other subtypes	Fang et al. 2014
AJ493605		down	KMT2A-AFP t(9;11) vs. other subtypes	Fang et al. 2014
ENST00000500401	ENSG00000247872	down	KMT2A-AFP t(9;11) vs. other subtypes	Fang et al. 2014
AK130554		down	KMT2A-AFP t(9;11) vs. other subtypes	Fang et al. 2014
ENST00000474769	ENSG00000242242	down	KMT2A-AFP t(9;11) vs. other subtypes	Fang et al. 2014
ENST00000456688	ENSG00000231856	down	KMT2A-AFP t(9;11) vs. other subtypes	Fang et al. 2014
uc003xrj.1	ENSG00000237807	down	KMT2A infant vs. other subtypes	Fang et al. 2014
ENST00000427447	ENSG00000237945	down	KMT2A infant vs. other subtypes	Fang et al. 2014
AF086267		down	KMT2A infant vs. other subtypes	Fang et al. 2014
NR_027270		down	KMT2A infant vs. other subtypes	Fang et al. 2014
NR_024284	ENSG00000237036	down	KMT2A infant vs. other subtypes	Fang et al. 2014
ENST00000442229	ENSG00000231667	down	KMT2A infant vs. other subtypes	Fang et al. 2014
ENST00000306515	ENSG00000168992	down	KMT2A infant vs. other subtypes	Fang et al. 2014
CR601061		down	KMT2A infant vs. other subtypes	Fang et al. 2014
NR_027345	ENSG00000258018	down	KMT2A infant vs. other subtypes	Fang et al. 2014
ENST00000444265	ENSG00000272168	down	KMT2A infant vs. other subtypes	Fang et al. 2014
NR_026761	ENSG00000153363	down	KMT2A infant vs. other subtypes	Fang et al. 2014
ENST00000463158	ENSG00000243429	down	KMT2A infant vs. other subtypes	Fang et al. 2014
AK091435		down	KMT2A infant vs. other subtypes	Fang et al. 2014
NR_003238		down	KMT2A infant vs. other subtypes	Fang et al. 2014
ENST00000434255	ENSG00000224374	down	KMT2A infant vs. other subtypes	Fang et al. 2014
ENST00000451663	ENSG00000215559	down	KMT2A infant vs. other subtypes	Fang et al. 2014
AA234012		down	KMT2A infant vs. other subtypes	Fang et al. 2014
NR_026755	ENSG00000228314	down	KMT2A infant vs. other subtypes	Fang et al. 2014
ENST00000453176		down	KMT2A infant vs. other subtypes	Fang et al. 2014
ENST00000509500	ENSG00000214273	down	KMT2A infant vs. other subtypes	Fang et al. 2014
ENST00000493675	ENSG00000241532	down	KMT2A infant vs. other subtypes	Fang et al. 2014
NR_029467		down	KMT2A infant vs. other subtypes	Fang et al. 2014
NR_026694		down	KMT2A infant vs. other subtypes	Fang et al. 2014
AL359058		down	KMT2A infant vs. other subtypes	Fang et al. 2014
ENST00000500487	ENSG00000247765	down	KMT2A infant vs. other subtypes	Fang et al. 2014
ENST00000436665	ENSG00000175772	down	KMT2A infant vs. other subtypes	Fang et al. 2014
uc001svy.1		down	KMT2A infant vs. other subtypes	Fang et al. 2014
AK054752		down	KMT2A infant vs. other subtypes	Fang et al. 2014
uc003xel.1		down	KMT2A infant vs. other subtypes	Fang et al. 2014
ENST00000416124	ENSG00000225873	down	KMT2A infant vs. other subtypes	Fang et al. 2014
uc002qyr.1		down	KMT2A infant vs. other subtypes	Fang et al. 2014
uc001vey.2		down	KMT2A infant vs. other subtypes	Fang et al. 2014
ENST00000440769	ENSG00000234292	down	KMT2A infant vs. other subtypes	Fang et al. 2014
AF038185		down	KMT2A infant vs. other subtypes	Fang et al. 2014
ENST00000233836	ENSG00000225569	down	KMT2A infant vs. other subtypes	Fang et al. 2014
AK095225		down	KMT2A infant vs. other subtypes	Fang et al. 2014
uc002jxg.1		up	KMT2A infant vs. other subtypes	Fang et al. 2014
AL137436		up	KMT2A infant vs. other subtypes	Fang et al. 2014
BC022435		up	KMT2A infant vs. other subtypes	Fang et al. 2014
BC036122		up	KMT2A infant vs. other subtypes	Fang et al. 2014
uc004cic.2		up	KMT2A infant vs. other subtypes	Fang et al. 2014
uc003ysq.2	ENSG00000229140	up	KMT2A infant vs. other subtypes	Fang et al. 2014
NR_028062		up	KMT2A infant vs. other subtypes	Fang et al. 2014
NR_033661		up	KMT2A infant vs. other subtypes	Fang et al. 2014
uc010xhe.1		up	KMT2A infant vs. other subtypes	Fang et al. 2014
BC013423		up	KMT2A infant vs. other subtypes	Fang et al. 2014
BALR-2 (CDK6-AS1)	ENSG00000237819	up	KMT2A vs. other subtypes	Fernando et al. 2015 (33)
BALR-6 (LOC339862)	ENSG00000226238	up	KMT2A vs. other subtypes	Fernando et al. 2015
CASC15	ENSG00000272168	up	ETV6-RUNX1 vs. other subtypes	Fernando et al. 2017
CASC15	ENSG00000272168	up	E2A-PBX1 vs. BCR-ABL	Fernando et al. 2017
lnc-C22orf34-1	ENSG00000260613	up	ETV6-RUNX1 vs. other subtypes	Ghazavi et al. 2016 (35)
lnc-RP11-683L23.1.1-2	ENSG00000263305	up	ETV6-RUNX1 vs. other subtypes	Ghazavi et al. 2016
lnc-CCDC37-2	ENSG00000249833	up	ETV6-RUNX1 vs. other subtypes	Ghazavi et al. 2016
lnc-MYOCD-2	ENSG00000179136	up	ETV6-RUNX1 vs. other subtypes	Ghazavi et al. 2016
lnc-RTN4R-1	ENSG00000249923	up	ETV6-RUNX1 vs. other subtypes	Ghazavi et al. 2016
lnc-TM2D1-2	ENSG00000237928	up	ETV6-RUNX1 vs. other subtypes	Ghazavi et al. 2016
lnc-TCF12-2	ENSG00000260172	up	ETV6-RUNX1 vs. other subtypes	Ghazavi et al. 2016
lnc-TIMM21-5	ENSG00000263958	up	ETV6-RUNX1 vs. other subtypes	Ghazavi et al. 2016
lnc-KLF15-3	ENSG00000250218	up	ETV6-RUNX1 vs. other subtypes	Ghazavi et al. 2016
lnc-FARS2-1	ENSG00000233064	up	ETV6-RUNX1 vs. other subtypes	Ghazavi et al. 2016
lnc-CCDC140-1	ENSG00000237732	up	ETV6-RUNX1 vs. other subtypes	Ghazavi et al. 2016
lnc-AC008060.7.1-1	ENSG00000218672	up	ETV6-RUNX1 vs. other subtypes	Ghazavi et al. 2016
lnc-FAM174B-2	ENSG00000258647	up	ETV6-RUNX1 vs. other subtypes	Ghazavi et al. 2016
lnc-CMPK2-3	ENSG00000205837	up	ETV6-RUNX1 vs. other subtypes	Ghazavi et al. 2016
lnc-C1orf87-3	ENSG00000231252	up	ETV6-RUNX1 vs. other subtypes	Ghazavi et al. 2016
lnc-KIDINS220-8	ENSG00000226506	up	ETV6-RUNX1 vs. other subtypes	Ghazavi et al. 2016
lnc-KLF15-2	ENSG00000251448	up	ETV6-RUNX1 vs. other subtypes	Ghazavi et al. 2016
lnc-TPTE2-1	ENSG00000229791	up	ETV6-RUNX1 vs. other subtypes	Ghazavi et al. 2016
lnc-NBPF16-3	ENSG00000232527	up	ETV6-RUNX1 vs. other subtypes	Ghazavi et al. 2016
lnc-AGPAT2-1	ENSG00000228401	up	ETV6-RUNX1 vs. other subtypes	Ghazavi et al. 2016
lnc-LRP8-3	ENSG00000230138	up	ETV6-RUNX1 vs. other subtypes	Ghazavi et al. 2016
lnc-CDH11-3	ENSG00000261742	up	ETV6-RUNX1 vs. other subtypes	Ghazavi et al. 2016
lnc-FAM120B-6	ENSG00000271234	up	ETV6-RUNX1 vs. other subtypes	Ghazavi et al. 2016
lnc-ASTN1-1	ENSG00000227579	up	ETV6-RUNX1 vs. other subtypes	Ghazavi et al. 2016
lnc-LSM11-5		up	ETV6-RUNX1 vs. other subtypes	Ghazavi et al. 2016
lnc-MAT2B-3	ENSG00000241956	up	ETV6-RUNX1 vs. other subtypes	Ghazavi et al. 2016
lnc-POTEM-2	ENSG00000244306	up	ETV6-RUNX1 vs. other subtypes	Ghazavi et al. 2016
lnc-FGF20-2		up	ETV6-RUNX1 vs. other subtypes	Ghazavi et al. 2016
lnc-BHLHE41-2	ENSG00000246695	up	ETV6-RUNX1 vs. other subtypes	Ghazavi et al. 2016
lnc-FRG1-3	ENSG00000250739	up	ETV6-RUNX1 vs. other subtypes	Ghazavi et al. 2016
lnc-CISD2-3	ENSG00000248740	up	ETV6-RUNX1 vs. other subtypes	Ghazavi et al. 2016
lnc-AC091435.1-2	ENSG00000249740	up	ETV6-RUNX1 vs. other subtypes	Ghazavi et al. 2016
lnc-EFHA2-2		up	ETV6-RUNX1 vs. other subtypes	Ghazavi et al. 2016
lnc-NBPF24-4	ENSG00000274020	up	ETV6-RUNX1 vs. other subtypes	Ghazavi et al. 2016
lnc-FOXL1-2	ENSG00000260944	up	ETV6-RUNX1 vs. other subtypes	Ghazavi et al. 2016
lnc-FRMD1-1	ENSG00000229921	up	ETV6-RUNX1 vs. other subtypes	Ghazavi et al. 2016
lnc-C14orf144-1	ENSG00000258913	up	ETV6-RUNX1 vs. other subtypes	Ghazavi et al. 2016
lnc-POTEG-4	ENSG00000257310	up	ETV6-RUNX1 vs. other subtypes	Ghazavi et al. 2016
lnc-AP000525.1-1	ENSG00000225255	up	ETV6-RUNX1 vs. other subtypes	Ghazavi et al. 2016
lnc-AC006305.1-1	ENSG00000260930	up	ETV6-RUNX1 vs. other subtypes	Ghazavi et al. 2016
lnc-C8orf4-1	ENSG00000254143	up	ETV6-RUNX1 vs. other subtypes	Ghazavi et al. 2016
lnc-AF165138.7.1-2	ENSG00000232884	up	ETV6-RUNX1 vs. other subtypes	Ghazavi et al. 2016
lnc-VRK2-2		up	ETV6-RUNX1 vs. other subtypes	Ghazavi et al. 2016
lnc-C18orf63-1	ENSG00000259779	up	ETV6-RUNX1 vs. other subtypes	Ghazavi et al. 2016
lnc-WDR60-4	ENSG00000231419	up	ETV6-RUNX1 vs. other subtypes	Ghazavi et al. 2016
lnc-GPATCH2-2	ENSG00000232480	up	ETV6-RUNX1 vs. other subtypes	Ghazavi et al. 2016
lnc-SEMA5A-2	ENSG00000260981	up	ETV6-RUNX1 vs. other subtypes	Ghazavi et al. 2016
lnc-DYRK2-4	ENSG00000255733	up	ETV6-RUNX1 vs. other subtypes	Ghazavi et al. 2016
lnc-CCT4-1	ENSG00000229839	up	ETV6-RUNX1 vs. other subtypes	Ghazavi et al. 2016
lnc-PLA2G4A-4	ENSG00000261182	up	ETV6-RUNX1 vs. other subtypes	Ghazavi et al. 2016
lnc-RXRA-3	ENSG00000228877	up	ETV6-RUNX1 vs. other subtypes	Ghazavi et al. 2016
lnc-AF165138.7.1-2	ENSG00000232884	up	ETV6-RUNX1 vs. other subtypes	Ghazavi et al. 2016
lnc-BTBD10-3	ENSG00000251381	up	ETV6-RUNX1 vs. other subtypes	Ghazavi et al. 2016
lnc-EVX1-13	ENSG00000233429	up	ETV6-RUNX1 vs. other subtypes	Ghazavi et al. 2016
lnc-LZTS1-2	ENSG00000254092	up	ETV6-RUNX1 vs. other subtypes	Ghazavi et al. 2016
lnc-PCNX-2	ENSG00000259153	up	ETV6-RUNX1 vs. other subtypes	Ghazavi et al. 2016
lnc-ARHGEF5-2	ENSG00000244479	up	ETV6-RUNX1 vs. other subtypes	Ghazavi et al. 2016
lnc-SULF2-2	ENSG00000255438	up	ETV6-RUNX1 vs. other subtypes	Ghazavi et al. 2016
lnc-SH3BGRL2-2	ENSG00000231533	up	ETV6-RUNX1 vs. other subtypes	Ghazavi et al. 2016
lnc-TIFA-3	ENSG00000248432	up	ETV6-RUNX1 vs. other subtypes	Ghazavi et al. 2016
lnc-IRX5-1	ENSG00000259711	up	ETV6-RUNX1 vs. other subtypes	Ghazavi et al. 2016
lnc-CEP44-1		up	ETV6-RUNX1 vs. other subtypes	Ghazavi et al. 2016
lnc-C8orf4-2	ENSG00000253665	up	ETV6-RUNX1 vs. other subtypes	Ghazavi et al. 2016
lnc-TCFL5-3	ENSG00000228705	up	ETV6-RUNX1 vs. other subtypes	Ghazavi et al. 2016
lnc-FAM160A1-6	ENSG00000245954	up	ETV6-RUNX1 vs. other subtypes	Ghazavi et al. 2016
lnc-TRIM27-10	ENSG00000225173	up	ETV6-RUNX1 vs. other subtypes	Ghazavi et al. 2016
lnc-RP11-511B23.3.1-3	ENSG00000257345	up	ETV6-RUNX1 vs. other subtypes	Ghazavi et al. 2016
lnc-ELK3-1		up	ETV6-RUNX1 vs. other subtypes	Ghazavi et al. 2016
lnc-RP11-57A19.3.1-1	ENSG00000246465	up	ETV6-RUNX1 vs. other subtypes	Ghazavi et al. 2016
lnc-CHD2-2	ENSG00000272888	up	ETV6-RUNX1 vs. other subtypes	Ghazavi et al. 2016
lnc-MTERF-6	ENSG00000223969	up	ETV6-RUNX1 vs. other subtypes	Ghazavi et al. 2016
lnc-FRMD1-2	ENSG00000235994	up	ETV6-RUNX1 vs. other subtypes	Ghazavi et al. 2016
lnc-DDX51-6	ENSG00000255933	up	ETV6-RUNX1 vs. other subtypes	Ghazavi et al. 2016
lnc-CHD2-4	ENSG00000257060	up	ETV6-RUNX1 vs. other subtypes	Ghazavi et al. 2016
lnc-JAM2-8		up	ETV6-RUNX1 vs. other subtypes	Ghazavi et al. 2016
lnc-FGF3-3	ENSG00000254417	up	ETV6-RUNX1 vs. other subtypes	Ghazavi et al. 2016
lnc-TIFA-2	ENSG00000249815	up	ETV6-RUNX1 vs. other subtypes	Ghazavi et al. 2016
lnc-TLE4-2	ENSG00000230945	up	ETV6-RUNX1 vs. other subtypes	Ghazavi et al. 2016
lnc-AZI2-2	ENSG00000235904	up	ETV6-RUNX1 vs. other subtypes	Ghazavi et al. 2016
lnc-CHD2-5	ENSG00000258631	up	ETV6-RUNX1 vs. other subtypes	Ghazavi et al. 2016
lnc-BMP6-6	ENSG00000285219	up	ETV6-RUNX1 vs. other subtypes	Ghazavi et al. 2016
lnc-ATP6V1H-1	ENSG00000237807	up	ETV6-RUNX1 vs. other subtypes	Ghazavi et al. 2016
lnc-GLI2-4	ENSG00000271709	up	ETV6-RUNX1 vs. other subtypes	Ghazavi et al. 2016
lnc-AADACL2-2	ENSG00000241151	up	ETV6-RUNX1 vs. other subtypes	Ghazavi et al. 2016
lnc-IL17RA-2	ENSG00000237438	up	ETV6-RUNX1 vs. other subtypes	Ghazavi et al. 2016
lnc-EGFL7-1	ENSG00000228401	up	ETV6-RUNX1 vs. other subtypes	Ghazavi et al. 2016
lnc-IRS2-1	ENSG00000236242	up	ETV6-RUNX1 vs. other subtypes	Ghazavi et al. 2016
lnc-PPIE-1	ENSG00000261798	up	ETV6-RUNX1 vs. other subtypes	Ghazavi et al. 2016
lnc-FBXO25-5		up	ETV6-RUNX1 vs. other subtypes	Ghazavi et al. 2016
lnc-WDR7-4	ENSG00000267732	up	ETV6-RUNX1 vs. other subtypes	Ghazavi et al. 2016
lnc-OR2K2-1	ENSG00000227531	up	ETV6-RUNX1 vs. other subtypes	Ghazavi et al. 2016
lnc-ECHDC3-1	ENSG00000271046	up	ETV6-RUNX1 vs. other subtypes	Ghazavi et al. 2016
lnc-ARHGAP10-2	ENSG00000250357	up	ETV6-RUNX1 vs. other subtypes	Ghazavi et al. 2016
lnc-FRMD1-4	ENSG00000146521	up	ETV6-RUNX1 vs. other subtypes	Ghazavi et al. 2016
lnc-ZNF366-2	ENSG00000248371	up	ETV6-RUNX1 vs. other subtypes	Ghazavi et al. 2016
lnc-PMAIP1-1	ENSG00000267686	up	ETV6-RUNX1 vs. other subtypes	Ghazavi et al. 2016
lnc-DHX37-10	ENSG00000256128	up	ETV6-RUNX1 vs. other subtypes	Ghazavi et al. 2016
lnc-SPANXB2-1	ENSG00000229269	up	ETV6-RUNX1 vs. other subtypes	Ghazavi et al. 2016
lnc-ANO1-2	ENSG00000255143	up	ETV6-RUNX1 vs. other subtypes	Ghazavi et al. 2016
lnc-FABP5-2	ENSG00000253214	up	ETV6-RUNX1 vs. other subtypes	Ghazavi et al. 2016
lnc-PDCD6IP-1	ENSG00000226320	up	ETV6-RUNX1 vs. other subtypes	Ghazavi et al. 2016
lnc-CDYL-3		up	ETV6-RUNX1 vs. other subtypes	Ghazavi et al. 2016
lnc-FAM168B-1	ENSG00000233221	up	ETV6-RUNX1 vs. other subtypes	Ghazavi et al. 2016
lnc-NKX3-2-1	ENSG00000246095	up	ETV6-RUNX1 vs. other subtypes	Ghazavi et al. 2016
lnc-LSM11-6	ENSG00000254350	up	ETV6-RUNX1 vs. other subtypes	Ghazavi et al. 2016
lnc-NME4-1	ENSG00000236829	up	ETV6-RUNX1 vs. other subtypes	Ghazavi et al. 2016
lnc-GIP-2	ENSG00000251461	up	ETV6-RUNX1 vs. other subtypes	Ghazavi et al. 2016
lnc-AGGF1-2	ENSG00000250615	up	ETV6-RUNX1 vs. other subtypes	Ghazavi et al. 2016
lnc-ENPP1-2	ENSG00000227220	up	ETV6-RUNX1 vs. other subtypes	Ghazavi et al. 2016
lnc-NCOA3-11	ENSG00000287107	up	ETV6-RUNX1 vs. other subtypes	Ghazavi et al. 2016
lnc-CALM1-1	ENSG00000233208	up	ETV6-RUNX1 vs. other subtypes	Ghazavi et al. 2016
lnc-POLD3-2	ENSG00000254928	up	ETV6-RUNX1 vs. other subtypes	Ghazavi et al. 2016
lnc-TXLNB-2	ENSG00000231329	up	ETV6-RUNX1 vs. other subtypes	Ghazavi et al. 2016
lnc-AF127577.1-6	ENSG00000232884	up	ETV6-RUNX1 vs. other subtypes	Ghazavi et al. 2016
lnc-SLC39A7-2	ENSG00000230313	up	ETV6-RUNX1 vs. other subtypes	Ghazavi et al. 2016
lnc-HDAC4-4	ENSG00000226992	up	ETV6-RUNX1 vs. other subtypes	Ghazavi et al. 2016
lnc-FMN1-4	ENSG00000259446	up	ETV6-RUNX1 vs. other subtypes	Ghazavi et al. 2016
lnc-KCTD6-4	ENSG00000242428	up	ETV6-RUNX1 vs. other subtypes	Ghazavi et al. 2016
lnc-SOD3-5	ENSG00000248837	up	ETV6-RUNX1 vs. other subtypes	Ghazavi et al. 2016
lnc-RP11-497E19.2.1-1	ENSG00000259107	up	ETV6-RUNX1 vs. other subtypes	Ghazavi et al. 2016
lnc-MOXD1-1		up	ETV6-RUNX1 vs. other subtypes	Ghazavi et al. 2016
lnc-YWHAH-1	ENSG00000227519	up	ETV6-RUNX1 vs. other subtypes	Ghazavi et al. 2016
lnc-RNF5-1	ENSG00000225914	up	ETV6-RUNX1 vs. other subtypes	Ghazavi et al. 2016
lnc-RGS9-1		up	ETV6-RUNX1 vs. other subtypes	Ghazavi et al. 2016
lnc-BRD1-2	ENSG00000226954	up	ETV6-RUNX1 vs. other subtypes	Ghazavi et al. 2016
lnc-CMYA5-1	ENSG00000251050	up	ETV6-RUNX1 vs. other subtypes	Ghazavi et al. 2016
lnc-NCOA3-5	ENSG00000229853	up	ETV6-RUNX1 vs. other subtypes	Ghazavi et al. 2016
lnc-OXSM-1		up	ETV6-RUNX1 vs. other subtypes	Ghazavi et al. 2016
lnc-ENPP1-4	ENSG00000228495	up	ETV6-RUNX1 vs. other subtypes	Ghazavi et al. 2016
lnc-ERP44-2	ENSG00000255145	up	ETV6-RUNX1 vs. other subtypes	Ghazavi et al. 2016
lnc-MEF2C-2	ENSG00000245526	up	ETV6-RUNX1 vs. other subtypes	Ghazavi et al. 2016
lnc-TMEM66-1	ENSG00000248964	up	ETV6-RUNX1 vs. other subtypes	Ghazavi et al. 2016
lnc-DLGAP2-2	ENSG00000282160	up	ETV6-RUNX1 vs. other subtypes	Ghazavi et al. 2016
lnc-COL4A1-2	ENSG00000275830	up	ETV6-RUNX1 vs. other subtypes	Ghazavi et al. 2016
lnc-SHE-1		up	ETV6-RUNX1 vs. other subtypes	Ghazavi et al. 2016
lnc-ANKRD27-2	ENSG00000267213	up	ETV6-RUNX1 vs. other subtypes	Ghazavi et al. 2016
lnc-SPTSSB-1	ENSG00000240354	up	ETV6-RUNX1 vs. other subtypes	Ghazavi et al. 2016
lnc-AP4E1-1	ENSG00000259773	up	ETV6-RUNX1 vs. other subtypes	Ghazavi et al. 2016
lnc-KCNMB2-5	ENSG00000228221	up	ETV6-RUNX1 vs. other subtypes	Ghazavi et al. 2016
lnc-DDX53-1	ENSG00000237019	up	ETV6-RUNX1 vs. other subtypes	Ghazavi et al. 2016
lnc-AC099552.4.1-3	ENSG00000273344	up	ETV6-RUNX1 vs. other subtypes	Ghazavi et al. 2016
lnc-MCTP2-5	ENSG00000258831	up	ETV6-RUNX1 vs. other subtypes	Ghazavi et al. 2016
lnc-ARHGAP10-3	ENSG00000250252	up	ETV6-RUNX1 vs. other subtypes	Ghazavi et al. 2016
lnc-BEST3-1	ENSG00000247131	up	ETV6-RUNX1 vs. other subtypes	Ghazavi et al. 2016
lnc-ALDH7A1-1	ENSG00000250602	up	ETV6-RUNX1 vs. other subtypes	Ghazavi et al. 2016
lnc-KLHDC10-1	ENSG00000229196	up	ETV6-RUNX1 vs. other subtypes	Ghazavi et al. 2016
lnc-CMPK2-13	ENSG00000224128	up	ETV6-RUNX1 vs. other subtypes	Ghazavi et al. 2016
lnc-ZKSCAN1-1	ENSG00000286923	up	ETV6-RUNX1 vs. other subtypes	Ghazavi et al. 2016
lnc-SOX1-3	ENSG00000260102	up	ETV6-RUNX1 vs. other subtypes	Ghazavi et al. 2016
lnc-ADAM18-1	ENSG00000254067	up	ETV6-RUNX1 vs. other subtypes	Ghazavi et al. 2016
lnc-CA1-1	ENSG00000253549	up	ETV6-RUNX1 vs. other subtypes	Ghazavi et al. 2016
lnc-LSM11-4	ENSG00000253134	up	ETV6-RUNX1 vs. other subtypes	Ghazavi et al. 2016
lnc-CIT-1	ENSG00000248636	up	ETV6-RUNX1 vs. other subtypes	Ghazavi et al. 2016
lnc-RXRA-1		up	ETV6-RUNX1 vs. other subtypes	Ghazavi et al. 2016
lnc-PEAK1.1-1		up	ETV6-RUNX1 vs. other subtypes	Ghazavi et al. 2016
lnc-CDYL2-4	ENSG00000260896	up	ETV6-RUNX1 vs. other subtypes	Ghazavi et al. 2016
lnc-MRPL39-11	ENSG00000235564	up	ETV6-RUNX1 vs. other subtypes	Ghazavi et al. 2016
lnc-TMCC1-1	ENSG00000250643	up	ETV6-RUNX1 vs. other subtypes	Ghazavi et al. 2016
lnc-C1orf87-2	ENSG00000226476	up	ETV6-RUNX1 vs. other subtypes	Ghazavi et al. 2016
lnc-DDX39A-2	ENSG00000266913	up	ETV6-RUNX1 vs. other subtypes	Ghazavi et al. 2016
lnc-FLRT2-2	ENSG00000258733	up	ETV6-RUNX1 vs. other subtypes	Ghazavi et al. 2016
lnc-DCLK2-3	ENSG00000248210	up	ETV6-RUNX1 vs. other subtypes	Ghazavi et al. 2016
lnc-TSC22D1-1	ENSG00000237361	up	ETV6-RUNX1 vs. other subtypes	Ghazavi et al. 2016
lnc-SORCS1-1	ENSG00000287047	up	ETV6-RUNX1 vs. other subtypes	Ghazavi et al. 2016
lnc-CPT2-7	ENSG00000225675	up	ETV6-RUNX1 vs. other subtypes	Ghazavi et al. 2016
lnc-MLLT3-1	ENSG00000227071	up	ETV6-RUNX1 vs. other subtypes	Ghazavi et al. 2016
lnc-ASMT-5		up	ETV6-RUNX1 vs. other subtypes	Ghazavi et al. 2016
lnc-GPCPD1-1	ENSG00000225640	up	ETV6-RUNX1 vs. other subtypes	Ghazavi et al. 2016
lnc-FGF20-1		up	ETV6-RUNX1 vs. other subtypes	Ghazavi et al. 2016
lnc-CLIC5-1	ENSG00000231769	up	ETV6-RUNX1 vs. other subtypes	Ghazavi et al. 2016
lnc-DBX2-1	ENSG00000257319	up	ETV6-RUNX1 vs. other subtypes	Ghazavi et al. 2016
lnc-NKX2-3-1	ENSG00000228778	up	ETV6-RUNX1 vs. other subtypes	Ghazavi et al. 2016
lnc-PREX1-2	ENSG00000286159	up	ETV6-RUNX1 vs. other subtypes	Ghazavi et al. 2016
lnc-CTD-2547L24.3.1-1	ENSG00000260810	up	ETV6-RUNX1 vs. other subtypes	Ghazavi et al. 2016
lnc-FPGT-6		up	ETV6-RUNX1 vs. other subtypes	Ghazavi et al. 2016
lnc-SULF2-4		up	ETV6-RUNX1 vs. other subtypes	Ghazavi et al. 2016
lnc-AP000322.54.1-1	ENSG00000225555	up	ETV6-RUNX1 vs. other subtypes	Ghazavi et al. 2016
lnc-MSR1-1	ENSG00000253496	up	ETV6-RUNX1 vs. other subtypes	Ghazavi et al. 2016
lnc-ATG2B-2	ENSG00000260806	up	ETV6-RUNX1 vs. other subtypes	Ghazavi et al. 2016
lnc-TLE3-3	ENSG00000280639	up	ETV6-RUNX1 vs. other subtypes	Ghazavi et al. 2016
lnc-SSTR4-2	ENSG00000230387	up	ETV6-RUNX1 vs. other subtypes	Ghazavi et al. 2016
lnc-LRRC3B-1	ENSG00000234165	up	ETV6-RUNX1 vs. other subtypes	Ghazavi et al. 2016
lnc-ECI2-1	ENSG00000237716	up	ETV6-RUNX1 vs. other subtypes	Ghazavi et al. 2016
lnc-AC092329.1-2		up	ETV6-RUNX1 vs. other subtypes	Ghazavi et al. 2016
lnc-MRPL39-12	ENSG00000231986	up	ETV6-RUNX1 vs. other subtypes	Ghazavi et al. 2016
lnc-EBF3-1	ENSG00000237224	up	ETV6-RUNX1 vs. other subtypes	Ghazavi et al. 2016
lnc-CERKL-3	ENSG00000236153	up	ETV6-RUNX1 vs. other subtypes	Ghazavi et al. 2016
lnc-PLA2G4A-2	ENSG00000230426	up	ETV6-RUNX1 vs. other subtypes	Ghazavi et al. 2016
lnc-SYK-6	ENSG00000233081	up	ETV6-RUNX1 vs. other subtypes	Ghazavi et al. 2016
lnc-PFDN4-1	ENSG00000236352	up	ETV6-RUNX1 vs. other subtypes	Ghazavi et al. 2016
lnc-TCF4-5	ENSG00000267712	up	ETV6-RUNX1 vs. other subtypes	Ghazavi et al. 2016
lnc-FAM123A-1	ENSG00000234056	up	ETV6-RUNX1 vs. other subtypes	Ghazavi et al. 2016
lnc-ICAM2-1	ENSG00000264954	up	ETV6-RUNX1 vs. other subtypes	Ghazavi et al. 2016
lnc-FURIN-1	ENSG00000259704	up	ETV6-RUNX1 vs. other subtypes	Ghazavi et al. 2016
lnc-QKI-2	ENSG00000235538	up	ETV6-RUNX1 vs. other subtypes	Ghazavi et al. 2016
lnc-EXOC2-5	ENSG00000286785	up	ETV6-RUNX1 vs. other subtypes	Ghazavi et al. 2016
lnc-NME3-2	ENSG00000261399	up	ETV6-RUNX1 vs. other subtypes	Ghazavi et al. 2016
lnc-ZNF146-1	ENSG00000267053	up	ETV6-RUNX1 vs. other subtypes	Ghazavi et al. 2016
lnc-SPATC1-1	ENSG00000204791	up	ETV6-RUNX1 vs. other subtypes	Ghazavi et al. 2016
lnc-USP25-2	ENSG00000215386	up	ETV6-RUNX1 vs. other subtypes	Ghazavi et al. 2016
lnc-AL591845.1-2	ENSG00000234481	up	ETV6-RUNX1 vs. other subtypes	Ghazavi et al. 2016
lnc-ACACA-1	ENSG00000277268	up	ETV6-RUNX1 vs. other subtypes	Ghazavi et al. 2016
lnc-MCTP2-6	ENSG00000258476	up	ETV6-RUNX1 vs. other subtypes	Ghazavi et al. 2016
lnc-ENPP1-3	ENSG00000236166	up	ETV6-RUNX1 vs. other subtypes	Ghazavi et al. 2016
lnc-FASLG-1	ENSG00000224000	up	ETV6-RUNX1 vs. other subtypes	Ghazavi et al. 2016
lnc-ZIC5-3	ENSG00000274605	up	ETV6-RUNX1 vs. other subtypes	Ghazavi et al. 2016
lnc-CCDC53-2	ENSG00000257202	up	ETV6-RUNX1 vs. other subtypes	Ghazavi et al. 2016
lnc-THADA-1	ENSG00000230587	up	ETV6-RUNX1 vs. other subtypes	Ghazavi et al. 2016
lnc-DYM-1		up	ETV6-RUNX1 vs. other subtypes	Ghazavi et al. 2016
lnc-C1orf86-1	ENSG00000182873	up	ETV6-RUNX1 vs. other subtypes	Ghazavi et al. 2016
lnc-PXDC1-2	ENSG00000228793	up	ETV6-RUNX1 vs. other subtypes	Ghazavi et al. 2016
lnc-AC005003.1-1	ENSG00000228839	up	ETV6-RUNX1 vs. other subtypes	Ghazavi et al. 2016
lnc-VPS13D-1	ENSG00000229484	up	ETV6-RUNX1 vs. other subtypes	Ghazavi et al. 2016
lnc-DYDC1-1	ENSG00000226659	up	ETV6-RUNX1 vs. other subtypes	Ghazavi et al. 2016
lnc-ZNF827-7		up	ETV6-RUNX1 vs. other subtypes	Ghazavi et al. 2016
lnc-NLRP12-2	ENSG00000232220	up	ETV6-RUNX1 vs. other subtypes	Ghazavi et al. 2016
lnc-ARFGEF2-2	ENSG00000281365	up	ETV6-RUNX1 vs. other subtypes	Ghazavi et al. 2016
lnc-SOX11-2	ENSG00000236106	up	ETV6-RUNX1 vs. other subtypes	Ghazavi et al. 2016
lnc-C9orf104-2	ENSG00000223795	up	ETV6-RUNX1 vs. other subtypes	Ghazavi et al. 2016
lnc-ATP6V1H-2		up	ETV6-RUNX1 vs. other subtypes	Ghazavi et al. 2016
lnc-GRHL2-2	ENSG00000254024	up	ETV6-RUNX1 vs. other subtypes	Ghazavi et al. 2016
lnc-SCCPDH-1	ENSG00000227953	up	ETV6-RUNX1 vs. other subtypes	Ghazavi et al. 2016
lnc-TSPAN10-1		up	ETV6-RUNX1 vs. other subtypes	Ghazavi et al. 2016
lnc-PCDH20-5	ENSG00000227564	up	ETV6-RUNX1 vs. other subtypes	Ghazavi et al. 2016
lnc-NMUR2-1	ENSG00000249484	up	ETV6-RUNX1 vs. other subtypes	Ghazavi et al. 2016
lnc-ELMOD2-1	ENSG00000248335	up	ETV6-RUNX1 vs. other subtypes	Ghazavi et al. 2016
lnc-ZNF366-5	ENSG00000249085	up	ETV6-RUNX1 vs. other subtypes	Ghazavi et al. 2016
lnc-ZNF33B-2	ENSG00000259869	up	ETV6-RUNX1 vs. other subtypes	Ghazavi et al. 2016
lnc-ERGIC1-2	ENSG00000253736	up	ETV6-RUNX1 vs. other subtypes	Ghazavi et al. 2016
lnc-FCGR3B-4	ENSG00000226889	up	ETV6-RUNX1 vs. other subtypes	Ghazavi et al. 2016
lnc-FNBP1L-2	ENSG00000260464	up	ETV6-RUNX1 vs. other subtypes	Ghazavi et al. 2016
lnc-C7orf62-1	ENSG00000238358	up	ETV6-RUNX1 vs. other subtypes	Ghazavi et al. 2016
lnc-PHOX2A-1	ENSG00000204971	up	ETV6-RUNX1 vs. other subtypes	Ghazavi et al. 2016
lnc-C10orf26-1		up	ETV6-RUNX1 vs. other subtypes	Ghazavi et al. 2016
lnc-SH3BGRL2-1		up	ETV6-RUNX1 vs. other subtypes	Ghazavi et al. 2016
lnc-SYK-5	ENSG00000229694	up	ETV6-RUNX1 vs. other subtypes	Ghazavi et al. 2016
lnc-DLX2-4	ENSG00000225205	up	ETV6-RUNX1 vs. other subtypes	Ghazavi et al. 2016
lnc-ELF2-2	ENSG00000250195	up	ETV6-RUNX1 vs. other subtypes	Ghazavi et al. 2016
lnc-TPTE2-2	ENSG00000230057	up	ETV6-RUNX1 vs. other subtypes	Ghazavi et al. 2016
lnc-KIDINS220-6	ENSG00000236790	up	ETV6-RUNX1 vs. other subtypes	Ghazavi et al. 2016
lnc-MKLN1-1	ENSG00000233559	up	ETV6-RUNX1 vs. other subtypes	Ghazavi et al. 2016
lnc-RPS29-2	ENSG00000258868	up	ETV6-RUNX1 vs. other subtypes	Ghazavi et al. 2016
lnc-LAMA2-2		up	ETV6-RUNX1 vs. other subtypes	Ghazavi et al. 2016
lnc-B9D1-2	ENSG00000235397	up	ETV6-RUNX1 vs. other subtypes	Ghazavi et al. 2016
lnc-KB-1507C5.2.1-2	ENSG00000253320	up	ETV6-RUNX1 vs. other subtypes	Ghazavi et al. 2016
lnc-PPP1R3G-2	ENSG00000272142	up	ETV6-RUNX1 vs. other subtypes	Ghazavi et al. 2016
lnc-DFFB-2	ENSG00000233304	up	ETV6-RUNX1 vs. other subtypes	Ghazavi et al. 2016
lnc-RRAS2-2	ENSG00000254438	up	ETV6-RUNX1 vs. other subtypes	Ghazavi et al. 2016
lnc-MAP3K9-3	ENSG00000259146	up	ETV6-RUNX1 vs. other subtypes	Ghazavi et al. 2016
lnc-AC022148.1-1	ENSG00000180458	up	ETV6-RUNX1 vs. other subtypes	Ghazavi et al. 2016
lnc-IRX3-4	ENSG00000245694	up	ETV6-RUNX1 vs. other subtypes	Ghazavi et al. 2016
lnc-RP11-90M5.1.1-3	ENSG00000232643	up	ETV6-RUNX1 vs. other subtypes	Ghazavi et al. 2016
lnc-WHAMM-2	ENSG00000250988	up	ETV6-RUNX1 vs. other subtypes	Ghazavi et al. 2016
lnc-GAS2-2	ENSG00000255418	up	ETV6-RUNX1 vs. other subtypes	Ghazavi et al. 2016
lnc-FAM192A-1	ENSG00000260148	up	ETV6-RUNX1 vs. other subtypes	Ghazavi et al. 2016
lnc-AL117340.1-2	ENSG00000237036	up	ETV6-RUNX1 vs. other subtypes	Ghazavi et al. 2016
lnc-TSC22D1-2		up	ETV6-RUNX1 vs. other subtypes	Ghazavi et al. 2016
lnc-ERP44-3	ENSG00000237461	up	ETV6-RUNX1 vs. other subtypes	Ghazavi et al. 2016
lnc-COL1A1-4	ENSG00000251179	up	ETV6-RUNX1 vs. other subtypes	Ghazavi et al. 2016
lnc-RRAS2-1	ENSG00000254418	up	ETV6-RUNX1 vs. other subtypes	Ghazavi et al. 2016
lnc-FRG2-3	ENSG00000224807	up	ETV6-RUNX1 vs. other subtypes	Ghazavi et al. 2016
lnc-KLF6-5	ENSG00000228353	up	ETV6-RUNX1 vs. other subtypes	Ghazavi et al. 2016
lnc-VAPA-1	ENSG00000223138	up	ETV6-RUNX1 vs. other subtypes	Ghazavi et al. 2016
lnc-ZNF675-1		up	ETV6-RUNX1 vs. other subtypes	Ghazavi et al. 2016
lnc-ENAH-1	ENSG00000226349	up	ETV6-RUNX1 vs. other subtypes	Ghazavi et al. 2016
lnc-YSK4-1	ENSG00000224043	up	ETV6-RUNX1 vs. other subtypes	Ghazavi et al. 2016
lnc-GPR55-2	ENSG00000226125	up	ETV6-RUNX1 vs. other subtypes	Ghazavi et al. 2016
lnc-ACVR1-1	ENSG00000234584	up	ETV6-RUNX1 vs. other subtypes	Ghazavi et al. 2016
lnc-DUSP4-4	ENSG00000251191	up	ETV6-RUNX1 vs. other subtypes	Ghazavi et al. 2016
lnc-ANGPT2-1	ENSG00000249898	up	ETV6-RUNX1 vs. other subtypes	Ghazavi et al. 2016
lnc-THUMPD3-1	ENSG00000235830	up	ETV6-RUNX1 vs. other subtypes	Ghazavi et al. 2016
lnc-CHD2-3	ENSG00000258888	up	ETV6-RUNX1 vs. other subtypes	Ghazavi et al. 2016
lnc-AC006372.1-1	ENSG00000223872	up	ETV6-RUNX1 vs. other subtypes	Ghazavi et al. 2016
lnc-GIP-1	ENSG00000250838	up	ETV6-RUNX1 vs. other subtypes	Ghazavi et al. 2016
lnc-MPV17L2-1	ENSG00000268650	up	ETV6-RUNX1 vs. other subtypes	Ghazavi et al. 2016
lnc-NRIP2-6	ENSG00000256271	up	ETV6-RUNX1 vs. other subtypes	Ghazavi et al. 2016
lnc-MPP7-2	ENSG00000237128	up	ETV6-RUNX1 vs. other subtypes	Ghazavi et al. 2016
lnc-FAM54B-1	ENSG00000236528	up	ETV6-RUNX1 vs. other subtypes	Ghazavi et al. 2016
lnc-AL353997.5.1-2	ENSG00000220161	up	ETV6-RUNX1 vs. other subtypes	Ghazavi et al. 2016
lnc-MYC-2	ENSG00000249859	up	ETV6-RUNX1 vs. other subtypes	Ghazavi et al. 2016
lnc-ZNF705A-2	ENSG00000215241	up	ETV6-RUNX1 vs. other subtypes	Ghazavi et al. 2016
lnc-ZNF479-1	ENSG00000234089	up	ETV6-RUNX1 vs. other subtypes	Ghazavi et al. 2016
lnc-BHLHE23-1	ENSG00000125514	up	ETV6-RUNX1 vs. other subtypes	Ghazavi et al. 2016
lnc-C16orf58-1	ENSG00000260740	up	ETV6-RUNX1 vs. other subtypes	Ghazavi et al. 2016
lnc-SEMA5A-1		up	ETV6-RUNX1 vs. other subtypes	Ghazavi et al. 2016
lnc-AJAP1-4	ENSG00000235054	up	ETV6-RUNX1 vs. other subtypes	Ghazavi et al. 2016
lnc-DSCAM-1	ENSG00000226496	up	ETV6-RUNX1 vs. other subtypes	Ghazavi et al. 2016
lnc-MRPL48-1	ENSG00000256034	up	ETV6-RUNX1 vs. other subtypes	Ghazavi et al. 2016
lnc-NUDCD2-2	ENSG00000254186	up	ETV6-RUNX1 vs. other subtypes	Ghazavi et al. 2016
lnc-FOXG1-6	ENSG00000257842	up	ETV6-RUNX1 vs. other subtypes	Ghazavi et al. 2016
lnc-IDH3B-1	ENSG00000228293	up	ETV6-RUNX1 vs. other subtypes	Ghazavi et al. 2016
lnc-EVX1-10	ENSG00000253552	up	ETV6-RUNX1 vs. other subtypes	Ghazavi et al. 2016
lnc-ZBED2-1	ENSG00000240766	up	ETV6-RUNX1 vs. other subtypes	Ghazavi et al. 2016
lnc-ATF3-1	ENSG00000260805	up	ETV6-RUNX1 vs. other subtypes	Ghazavi et al. 2016
lnc-TXLNB-2	ENSG00000231329	up	ETV6-RUNX1 vs. other subtypes	Ghazavi et al. 2016
lnc-MYO16-4	ENSG00000234854	up	ETV6-RUNX1 vs. other subtypes	Ghazavi et al. 2016
lnc-PTCD2-1		up	ETV6-RUNX1 vs. other subtypes	Ghazavi et al. 2016
lnc-SNURF-1	ENSG00000224078	up	ETV6-RUNX1 vs. other subtypes	Ghazavi et al. 2016
lnc-ZNF705D-1	ENSG00000255052	up	ETV6-RUNX1 vs. other subtypes	Ghazavi et al. 2016
lnc-PSMB4-1	ENSG00000237976	up	ETV6-RUNX1 vs. other subtypes	Ghazavi et al. 2016
lnc-SETD8-1	ENSG00000256092	up	ETV6-RUNX1 vs. other subtypes	Ghazavi et al. 2016
lnc-ATP8A1-1	ENSG00000250781	up	ETV6-RUNX1 vs. other subtypes	Ghazavi et al. 2016
lnc-DHX37-9	ENSG00000256732	up	ETV6-RUNX1 vs. other subtypes	Ghazavi et al. 2016
lnc-HIST2H3PS2-1	ENSG00000234571	up	ETV6-RUNX1 vs. other subtypes	Ghazavi et al. 2016
lnc-ATMIN-4	ENSG00000245059	up	ETV6-RUNX1 vs. other subtypes	Ghazavi et al. 2016
lnc-CTD-2134A5.2.1-2	ENSG00000287346	up	ETV6-RUNX1 vs. other subtypes	Ghazavi et al. 2016
lnc-ZBTB37-1	ENSG00000224977	up	ETV6-RUNX1 vs. other subtypes	Ghazavi et al. 2016
lnc-PDZD9-1	ENSG00000260277	up	ETV6-RUNX1 vs. other subtypes	Ghazavi et al. 2016
lnc-HMG20A-2	ENSG00000259420	up	ETV6-RUNX1 vs. other subtypes	Ghazavi et al. 2016
lnc-THADA-4	ENSG00000224739	up	ETV6-RUNX1 vs. other subtypes	Ghazavi et al. 2016
lnc-LYPLAL1-1	ENSG00000228063	up	ETV6-RUNX1 vs. other subtypes	Ghazavi et al. 2016
lnc-NCOA3-6	ENSG00000234967	up	ETV6-RUNX1 vs. other subtypes	Ghazavi et al. 2016
lnc-KIAA0232-1		up	ETV6-RUNX1 vs. other subtypes	Ghazavi et al. 2016
lnc-COG5-2	ENSG00000243193	up	ETV6-RUNX1 vs. other subtypes	Ghazavi et al. 2016
lnc-HES4-1	ENSG00000224969	up	ETV6-RUNX1 vs. other subtypes	Ghazavi et al. 2016
lnc-AC092329.1-1	ENSG00000269416	up	ETV6-RUNX1 vs. other subtypes	Ghazavi et al. 2016
lnc-NR1I2-1	ENSG00000242622	up	ETV6-RUNX1 vs. other subtypes	Ghazavi et al. 2016
lnc-MTRR-5	ENSG00000250198	up	ETV6-RUNX1 vs. other subtypes	Ghazavi et al. 2016
lnc-RPLP1-1	ENSG00000245750	up	ETV6-RUNX1 vs. other subtypes	Ghazavi et al. 2016
lnc-PADI1-1	ENSG00000204362	up	ETV6-RUNX1 vs. other subtypes	Ghazavi et al. 2016
lnc-SHARPIN-2	ENSG00000255224	up	ETV6-RUNX1 vs. other subtypes	Ghazavi et al. 2016
lnc-ZNF827-5	ENSG00000250902	up	ETV6-RUNX1 vs. other subtypes	Ghazavi et al. 2016
lnc-HDDC2-3	ENSG00000146373	up	ETV6-RUNX1 vs. other subtypes	Ghazavi et al. 2016
lnc-LRCH4-1	ENSG00000224729	up	ETV6-RUNX1 vs. other subtypes	Ghazavi et al. 2016
lnc-DNAJC11-2	ENSG00000237365	up	ETV6-RUNX1 vs. other subtypes	Ghazavi et al. 2016
lnc-LRP5L-4	ENSG00000231933	up	ETV6-RUNX1 vs. other subtypes	Ghazavi et al. 2016
lnc-TMEM105-2	ENSG00000262223	up	ETV6-RUNX1 vs. other subtypes	Ghazavi et al. 2016
lnc-GBE1-3	ENSG00000241593	up	ETV6-RUNX1 vs. other subtypes	Ghazavi et al. 2016
lnc-ASF1A-3	ENSG00000287100	up	ETV6-RUNX1 vs. other subtypes	Ghazavi et al. 2016
lnc-FASTKD3-1	ENSG00000245729	up	ETV6-RUNX1 vs. other subtypes	Ghazavi et al. 2016
lnc-OR10AB1P-2	ENSG00000254707	up	ETV6-RUNX1 vs. other subtypes	Ghazavi et al. 2016
lnc-RASGRP3-1	ENSG00000228262	up	ETV6-RUNX1 vs. other subtypes	Ghazavi et al. 2016
lnc-UPP2-2	ENSG00000270557	up	ETV6-RUNX1 vs. other subtypes	Ghazavi et al. 2016
lnc-ERI1-3		up	ETV6-RUNX1 vs. other subtypes	Ghazavi et al. 2016
lnc-MTRR-4	ENSG00000249782	up	ETV6-RUNX1 vs. other subtypes	Ghazavi et al. 2016
lnc-DNAJC8-1	ENSG00000270605	up	ETV6-RUNX1 vs. other subtypes	Ghazavi et al. 2016
lnc-CRYBA4-9	ENSG00000230051	up	ETV6-RUNX1 vs. other subtypes	Ghazavi et al. 2016
lnc-AC091801.1.1-3	ENSG00000231892	up	ETV6-RUNX1 vs. other subtypes	Ghazavi et al. 2016
lnc-FAM19A5-1	ENSG00000287225	up	ETV6-RUNX1 vs. other subtypes	Ghazavi et al. 2016
lnc-RP11-579D7.1.1-1	ENSG00000257653	up	ETV6-RUNX1 vs. other subtypes	Ghazavi et al. 2016
lnc-ITPR3-1	ENSG00000233183	up	ETV6-RUNX1 vs. other subtypes	Ghazavi et al. 2016
lnc-COPG2-2	ENSG00000259920	up	ETV6-RUNX1 vs. other subtypes	Ghazavi et al. 2016
lnc-C2CD4A-1	ENSG00000259251	up	ETV6-RUNX1 vs. other subtypes	Ghazavi et al. 2016
lnc-LUZP2-1	ENSG00000255193	up	ETV6-RUNX1 vs. other subtypes	Ghazavi et al. 2016
lnc-ZNF831-1		up	ETV6-RUNX1 vs. other subtypes	Ghazavi et al. 2016
lnc-TMEM109-1	ENSG00000257052	up	ETV6-RUNX1 vs. other subtypes	Ghazavi et al. 2016
lnc-MBD2-1	ENSG00000260433	up	ETV6-RUNX1 vs. other subtypes	Ghazavi et al. 2016
lnc-SIRT1-1	ENSG00000272892	up	ETV6-RUNX1 vs. other subtypes	Ghazavi et al. 2016
lnc-NPR2-1	ENSG00000227388	up	ETV6-RUNX1 vs. other subtypes	Ghazavi et al. 2016
lnc-BASP1-6	ENSG00000246214	up	ETV6-RUNX1 vs. other subtypes	Ghazavi et al. 2016
lnc-CACNB3-1	ENSG00000257660	up	ETV6-RUNX1 vs. other subtypes	Ghazavi et al. 2016
lnc-CMC1-1	ENSG00000225548	up	ETV6-RUNX1 vs. other subtypes	Ghazavi et al. 2016
lnc-GMDS-4		up	ETV6-RUNX1 vs. other subtypes	Ghazavi et al. 2016
lnc-GPR3-2	ENSG00000237429	up	ETV6-RUNX1 vs. other subtypes	Ghazavi et al. 2016
lnc-LGALSL-1	ENSG00000223935	up	ETV6-RUNX1 vs. other subtypes	Ghazavi et al. 2016
lnc-TLR5-1		up	ETV6-RUNX1 vs. other subtypes	Ghazavi et al. 2016
lnc-SCN2A-1	ENSG00000236283	up	ETV6-RUNX1 vs. other subtypes	Ghazavi et al. 2016
lnc-NLRP12-1	ENSG00000228323	up	ETV6-RUNX1 vs. other subtypes	Ghazavi et al. 2016
lnc-FGGY-4	ENSG00000237352	up	ETV6-RUNX1 vs. other subtypes	Ghazavi et al. 2016
lnc-C6orf123-1	ENSG00000198221	up	ETV6-RUNX1 vs. other subtypes	Ghazavi et al. 2016
lnc-FAM103A1-2	ENSG00000260608	up	ETV6-RUNX1 vs. other subtypes	Ghazavi et al. 2016
lnc-CMPK2-4	ENSG00000236172	up	ETV6-RUNX1 vs. other subtypes	Ghazavi et al. 2016
lnc-CNTN1-1	ENSG00000258167	up	ETV6-RUNX1 vs. other subtypes	Ghazavi et al. 2016
lnc-CENPP-2	ENSG00000236115	up	ETV6-RUNX1 vs. other subtypes	Ghazavi et al. 2016
lnc-TDRD9-AS1-1	ENSG00000258748	up	ETV6-RUNX1 vs. other subtypes	Ghazavi et al. 2016
lnc-TCF4-1	ENSG00000267325	up	ETV6-RUNX1 vs. other subtypes	Ghazavi et al. 2016
lnc-BASP1-5	ENSG00000250415	up	ETV6-RUNX1 vs. other subtypes	Ghazavi et al. 2016
lnc-PKHD1-1	ENSG00000225613	up	ETV6-RUNX1 vs. other subtypes	Ghazavi et al. 2016
lnc-CNN1-1		up	ETV6-RUNX1 vs. other subtypes	Ghazavi et al. 2016
lnc-COG3-1	ENSG00000251015	up	ETV6-RUNX1 vs. other subtypes	Ghazavi et al. 2016
lnc-URI1-1	ENSG00000267258	up	ETV6-RUNX1 vs. other subtypes	Ghazavi et al. 2016
lnc-RAC3-1	ENSG00000264569	up	ETV6-RUNX1 vs. other subtypes	Ghazavi et al. 2016
lnc-KIDINS220-2	ENSG00000235092	up	ETV6-RUNX1 vs. other subtypes	Ghazavi et al. 2016
lnc-PCSK9-1	ENSG00000231090	up	ETV6-RUNX1 vs. other subtypes	Ghazavi et al. 2016
lnc-CLCNKB-1	ENSG00000227959	up	ETV6-RUNX1 vs. other subtypes	Ghazavi et al. 2016
lnc-AKTIP-1		up	ETV6-RUNX1 vs. other subtypes	Ghazavi et al. 2016
lnc-NR1D1-1		up	ETV6-RUNX1 vs. other subtypes	Ghazavi et al. 2016
lnc-M6PR-2	ENSG00000256904	up	ETV6-RUNX1 vs. other subtypes	Ghazavi et al. 2016
lnc-AC090186.1-3	ENSG00000254314	up	ETV6-RUNX1 vs. other subtypes	Ghazavi et al. 2016
lnc-WDR7-6	ENSG00000267327	up	ETV6-RUNX1 vs. other subtypes	Ghazavi et al. 2016
lnc-PHKB-2	ENSG00000261231	up	ETV6-RUNX1 vs. other subtypes	Ghazavi et al. 2016
lnc-TSN-2	ENSG00000236859	up	ETV6-RUNX1 vs. other subtypes	Ghazavi et al. 2016
lnc-BCL2L13-1	ENSG00000269220	up	ETV6-RUNX1 vs. other subtypes	Ghazavi et al. 2016
lnc-CHADL-1	ENSG00000235513	up	ETV6-RUNX1 vs. other subtypes	Ghazavi et al. 2016
lnc-ASB1-1	ENSG00000274346	up	ETV6-RUNX1 vs. other subtypes	Ghazavi et al. 2016
lnc-FES-2	ENSG00000214432	up	ETV6-RUNX1 vs. other subtypes	Ghazavi et al. 2016
lnc-TMEM132C-6	ENSG00000278266	up	ETV6-RUNX1 vs. other subtypes	Ghazavi et al. 2016
lnc-PAX5-2	ENSG00000260100	up	ETV6-RUNX1 vs. other subtypes	Ghazavi et al. 2016
lnc-PARN-1	ENSG00000263257	up	ETV6-RUNX1 vs. other subtypes	Ghazavi et al. 2016
lnc-TIFA-1	ENSG00000260526	up	ETV6-RUNX1 vs. other subtypes	Ghazavi et al. 2016
lnc-CYP4V2-1		up	ETV6-RUNX1 vs. other subtypes	Ghazavi et al. 2016
lnc-SLC5A2-1	ENSG00000260625	up	ETV6-RUNX1 vs. other subtypes	Ghazavi et al. 2016
lnc-FGF3-1	ENSG00000254605	up	ETV6-RUNX1 vs. other subtypes	Ghazavi et al. 2016
lnc-FOXJ1-1	ENSG00000267128	up	ETV6-RUNX1 vs. other subtypes	Ghazavi et al. 2016
lnc-CDH4-1		up	ETV6-RUNX1 vs. other subtypes	Ghazavi et al. 2016
lnc-HMG20A-1	ENSG00000259362	up	ETV6-RUNX1 vs. other subtypes	Ghazavi et al. 2016
lnc-ZNF793-1	ENSG00000267470	up	ETV6-RUNX1 vs. other subtypes	Ghazavi et al. 2016
lnc-FMN1-2		up	ETV6-RUNX1 vs. other subtypes	Ghazavi et al. 2016
lnc-LRIG1-1		up	ETV6-RUNX1 vs. other subtypes	Ghazavi et al. 2016
lnc-NRIP2-5	ENSG00000246627	up	ETV6-RUNX1 vs. other subtypes	Ghazavi et al. 2016
lnc-FOXO4-1		up	ETV6-RUNX1 vs. other subtypes	Ghazavi et al. 2016
lnc-C3orf23-1	ENSG00000283036	up	ETV6-RUNX1 vs. other subtypes	Ghazavi et al. 2016
lnc-KCTD10-1	ENSG00000224666	up	ETV6-RUNX1 vs. other subtypes	Ghazavi et al. 2016
lnc-ATP10B-1	ENSG00000253417	up	ETV6-RUNX1 vs. other subtypes	Ghazavi et al. 2016
lnc-CTTNBP2-1	ENSG00000083622	up	ETV6-RUNX1 vs. other subtypes	Ghazavi et al. 2016
lnc-SCRIB-1	ENSG00000254973	up	ETV6-RUNX1 vs. other subtypes	Ghazavi et al. 2016
lnc-ZHX3-1	ENSG00000226648	up	ETV6-RUNX1 vs. other subtypes	Ghazavi et al. 2016
lnc-EPDR1-1		up	ETV6-RUNX1 vs. other subtypes	Ghazavi et al. 2016
lnc-AC007663.1-1		up	ETV6-RUNX1 vs. other subtypes	Ghazavi et al. 2016
lnc-PRSS22-1	ENSG00000263280	up	ETV6-RUNX1 vs. other subtypes	Ghazavi et al. 2016
lnc-SEL1L-7	ENSG00000258532	up	ETV6-RUNX1 vs. other subtypes	Ghazavi et al. 2016
lnc-AL592284.1-1		up	ETV6-RUNX1 vs. other subtypes	Ghazavi et al. 2016
lnc-RASGRF1-1	ENSG00000259234	up	ETV6-RUNX1 vs. other subtypes	Ghazavi et al. 2016
lnc-FAM131B-1	ENSG00000234056	up	ETV6-RUNX1 vs. other subtypes	Ghazavi et al. 2016
lnc-SLC3A2-1	ENSG00000256690	up	ETV6-RUNX1 vs. other subtypes	Ghazavi et al. 2016
lnc-ZFP90-2		up	ETV6-RUNX1 vs. other subtypes	Ghazavi et al. 2016
lnc-FGF3-2	ENSG00000248844	up	ETV6-RUNX1 vs. other subtypes	Ghazavi et al. 2016
lnc-DZIP1-1	ENSG00000247400	up	ETV6-RUNX1 vs. other subtypes	Ghazavi et al. 2016
lnc-SMCR7-1	ENSG00000260647	up	ETV6-RUNX1 vs. other subtypes	Ghazavi et al. 2016
lnc-TMEM106C-1	ENSG00000257985	up	ETV6-RUNX1 vs. other subtypes	Ghazavi et al. 2016
lnc-PTHLH-1	ENSG00000247934	up	ETV6-RUNX1 vs. other subtypes	Ghazavi et al. 2016
lnc-TRA2A-1	ENSG00000234286	up	ETV6-RUNX1 vs. other subtypes	Ghazavi et al. 2016
lnc-COL5A1-3	ENSG00000227150	up	ETV6-RUNX1 vs. other subtypes	Ghazavi et al. 2016
lnc-POU3F3-6	ENSG00000256637	up	ETV6-RUNX1 vs. other subtypes	Ghazavi et al. 2016
lnc-VSTM2B-6	ENSG00000267339	up	ETV6-RUNX1 vs. other subtypes	Ghazavi et al. 2016
lnc-NPVF-4		up	ETV6-RUNX1 vs. other subtypes	Ghazavi et al. 2016
lnc-WDR27-2	ENSG00000226194	up	ETV6-RUNX1 vs. other subtypes	Ghazavi et al. 2016
lnc-AKIRIN1-1	ENSG00000228436	up	ETV6-RUNX1 vs. other subtypes	Ghazavi et al. 2016
lnc-SETD6-8		up	ETV6-RUNX1 vs. other subtypes	Ghazavi et al. 2016
lnc-TMPRSS15-9	ENSG00000224924	down	ETV6-RUNX1 vs. other subtypes	Ghazavi et al. 2016
lnc-AC009113.1-2	ENSG00000261253	down	ETV6-RUNX1 vs. other subtypes	Ghazavi et al. 2016
lnc-ZNF492-1	ENSG00000269364	down	ETV6-RUNX1 vs. other subtypes	Ghazavi et al. 2016
lnc-CAND2-1		down	ETV6-RUNX1 vs. other subtypes	Ghazavi et al. 2016
lnc-CXXC5-1	ENSG00000249526	down	ETV6-RUNX1 vs. other subtypes	Ghazavi et al. 2016
lnc-SMARCC2-5	ENSG00000257553	down	ETV6-RUNX1 vs. other subtypes	Ghazavi et al. 2016
lnc-CYP4A22-2	ENSG00000224805	down	ETV6-RUNX1 vs. other subtypes	Ghazavi et al. 2016
lnc-RCCD1-1	ENSG00000258725	down	ETV6-RUNX1 vs. other subtypes	Ghazavi et al. 2016
lnc-NOC2L-1	ENSG00000223764	down	ETV6-RUNX1 vs. other subtypes	Ghazavi et al. 2016
lnc-ICOSLG-6	ENSG00000225331	down	ETV6-RUNX1 vs. other subtypes	Ghazavi et al. 2016
lnc-MEIS1-3	ENSG00000232046	down	ETV6-RUNX1 vs. other subtypes	Ghazavi et al. 2016
lnc-HES3-1	ENSG00000225077	down	ETV6-RUNX1 vs. other subtypes	Ghazavi et al. 2016
lnc-RP11-82I10.1.1-6	ENSG00000259611	down	ETV6-RUNX1 vs. other subtypes	Ghazavi et al. 2016
lnc-VN1R2-1		down	ETV6-RUNX1 vs. other subtypes	Ghazavi et al. 2016
lnc-EPHB4-1	ENSG00000236305	down	ETV6-RUNX1 vs. other subtypes	Ghazavi et al. 2016
lnc-ALOX12B-1	ENSG00000214999;	down	ETV6-RUNX1 vs. other subtypes	Ghazavi et al. 2016
lnc-TRMT61B-4		down	ETV6-RUNX1 vs. other subtypes	Ghazavi et al. 2016
lnc-GEMIN8-1	ENSG00000212663	down	ETV6-RUNX1 vs. other subtypes	Ghazavi et al. 2016
lnc-TAF12-3	ENSG00000233427	down	ETV6-RUNX1 vs. other subtypes	Ghazavi et al. 2016
lnc-EMP3-1		down	ETV6-RUNX1 vs. other subtypes	Ghazavi et al. 2016
lnc-CPEB4-1		down	ETV6-RUNX1 vs. other subtypes	Ghazavi et al. 2016
lnc-RAB40A-1		down	ETV6-RUNX1 vs. other subtypes	Ghazavi et al. 2016
lnc-BOLA2B-1	ENSG00000261416	down	ETV6-RUNX1 vs. other subtypes	Ghazavi et al. 2016
lnc-C2orf76-1		down	ETV6-RUNX1 vs. other subtypes	Ghazavi et al. 2016
lnc-SCN8A-3	ENSG00000260473	down	ETV6-RUNX1 vs. other subtypes	Ghazavi et al. 2016
lnc-NNAT-1	ENSG00000274469	down	ETV6-RUNX1 vs. other subtypes	Ghazavi et al. 2016
lnc-PGBD5-2	ENSG00000227006	down	ETV6-RUNX1 vs. other subtypes	Ghazavi et al. 2016
lnc-SYT4-2	ENSG00000267337	down	ETV6-RUNX1 vs. other subtypes	Ghazavi et al. 2016
lnc-CLSTN2-2	ENSG00000251471	down	ETV6-RUNX1 vs. other subtypes	Ghazavi et al. 2016
lnc-BOLA2B-1	ENSG00000261416	down	ETV6-RUNX1 vs. other subtypes	Ghazavi et al. 2016
lnc-TP53TG3-3		down	ETV6-RUNX1 vs. other subtypes	Ghazavi et al. 2016
lnc-PKLR-1		down	ETV6-RUNX1 vs. other subtypes	Ghazavi et al. 2016
lnc-C14orf79-2	ENSG00000257556	down	ETV6-RUNX1 vs. other subtypes	Ghazavi et al. 2016
lnc-C15orf57-1	ENSG00000259211	down	ETV6-RUNX1 vs. other subtypes	Ghazavi et al. 2016
lnc-NKD1-1		down	ETV6-RUNX1 vs. other subtypes	Ghazavi et al. 2016
lnc-SERTAD2-2	ENSG00000234572	down	ETV6-RUNX1 vs. other subtypes	Ghazavi et al. 2016
lnc-LDLRAP1-1	ENSG00000225643	down	ETV6-RUNX1 vs. other subtypes	Ghazavi et al. 2016
lnc-UCHL3-6	ENSG00000281167	down	ETV6-RUNX1 vs. other subtypes	Ghazavi et al. 2016
lnc-SSTR5-1	ENSG00000261720	down	ETV6-RUNX1 vs. other subtypes	Ghazavi et al. 2016
lnc-SPRED2-7	ENSG00000237179	down	ETV6-RUNX1 vs. other subtypes	Ghazavi et al. 2016
lnc-FBXW7-1	ENSG00000251377	down	ETV6-RUNX1 vs. other subtypes	Ghazavi et al. 2016
lnc-FGFBP3-1	ENSG00000228701	down	ETV6-RUNX1 vs. other subtypes	Ghazavi et al. 2016
lnc-ANKRD65-3	ENSG00000225285	down	ETV6-RUNX1 vs. other subtypes	Ghazavi et al. 2016
lnc-KATNAL2-4		down	ETV6-RUNX1 vs. other subtypes	Ghazavi et al. 2016
lnc-LINC00273-8	ENSG00000256642	down	ETV6-RUNX1 vs. other subtypes	Ghazavi et al. 2016
lnc-CPN2-1	ENSG00000214145	down	ETV6-RUNX1 vs. other subtypes	Ghazavi et al. 2016
lnc-SMC1A-2		down	ETV6-RUNX1 vs. other subtypes	Ghazavi et al. 2016
lnc-SIK1-4	ENSG00000185186	down	ETV6-RUNX1 vs. other subtypes	Ghazavi et al. 2016
lnc-PPARGC1B-1		down	ETV6-RUNX1 vs. other subtypes	Ghazavi et al. 2016
lnc-CLOCK-1	ENSG00000249700	down	ETV6-RUNX1 vs. other subtypes	Ghazavi et al. 2016
lnc-C4orf42-3	ENSG00000227189	down	ETV6-RUNX1 vs. other subtypes	Ghazavi et al. 2016
lnc-C17orf77-1	ENSG00000261222	down	ETV6-RUNX1 vs. other subtypes	Ghazavi et al. 2016
lnc-TMEM179-2	ENSG00000258736	down	ETV6-RUNX1 vs. other subtypes	Ghazavi et al. 2016
lnc-FAM53A-2		down	ETV6-RUNX1 vs. other subtypes	Ghazavi et al. 2016
lnc-SFTPB-1		down	ETV6-RUNX1 vs. other subtypes	Ghazavi et al. 2016
lnc-LSM11-2	ENSG00000253673	down	ETV6-RUNX1 vs. other subtypes	Ghazavi et al. 2016
lnc-PTGES2-1	ENSG00000234771	down	ETV6-RUNX1 vs. other subtypes	Ghazavi et al. 2016
lnc-ZDHHC2-1	ENSG00000249258	down	ETV6-RUNX1 vs. other subtypes	Ghazavi et al. 2016
lnc-ANO2-2	ENSG00000256115	down	ETV6-RUNX1 vs. other subtypes	Ghazavi et al. 2016
lnc-ZDHHC6-1	ENSG00000232934	down	ETV6-RUNX1 vs. other subtypes	Ghazavi et al. 2016
lnc-STAP1-4	ENSG00000251527	down	ETV6-RUNX1 vs. other subtypes	Ghazavi et al. 2016
lnc-RP11-150O12.6.1-1	ENSG00000253161	down	ETV6-RUNX1 vs. other subtypes	Ghazavi et al. 2016
lnc-YY1-1	ENSG00000258504	down	ETV6-RUNX1 vs. other subtypes	Ghazavi et al. 2016
lnc-TBC1D19-4		down	ETV6-RUNX1 vs. other subtypes	Ghazavi et al. 2016
lnc-CAST-2	ENSG00000248734	down	ETV6-RUNX1 vs. other subtypes	Ghazavi et al. 2016
lnc-LTBP3-2		down	ETV6-RUNX1 vs. other subtypes	Ghazavi et al. 2016
lnc-QRSL1-1	ENSG00000229654	down	ETV6-RUNX1 vs. other subtypes	Ghazavi et al. 2016
lnc-RAB9A-1		down	ETV6-RUNX1 vs. other subtypes	Ghazavi et al. 2016
lnc-LRRC32-6	ENSG00000255100	down	ETV6-RUNX1 vs. other subtypes	Ghazavi et al. 2016
lnc-RP11-315O6.2.1-1	ENSG00000255337	down	ETV6-RUNX1 vs. other subtypes	Ghazavi et al. 2016
lnc-SPTBN5-1	ENSG00000250379	down	ETV6-RUNX1 vs. other subtypes	Ghazavi et al. 2016
lnc-SOCS6-1	ENSG00000266258	down	ETV6-RUNX1 vs. other subtypes	Ghazavi et al. 2016
lnc-TFRC-1	ENSG00000223783	down	ETV6-RUNX1 vs. other subtypes	Ghazavi et al. 2016
lnc-EDAR-4	ENSG00000214184	down	ETV6-RUNX1 vs. other subtypes	Ghazavi et al. 2016
lnc-TMEM55B-1	ENSG00000258908	down	ETV6-RUNX1 vs. other subtypes	Ghazavi et al. 2016
lnc-CLINT1-1	ENSG00000253792	down	ETV6-RUNX1 vs. other subtypes	Ghazavi et al. 2016
lnc-ARHGAP17-2	ENSG00000260448	down	ETV6-RUNX1 vs. other subtypes	Ghazavi et al. 2016
lnc-IL16-1	ENSG00000259343	down	ETV6-RUNX1 vs. other subtypes	Ghazavi et al. 2016
lnc-ANKRD26-3	ENSG00000283709	down	ETV6-RUNX1 vs. other subtypes	Ghazavi et al. 2016
lnc-KATNAL2-1	ENSG00000270112	down	ETV6-RUNX1 vs. other subtypes	Ghazavi et al. 2016
lnc-KLF7-1	ENSG00000234902	down	ETV6-RUNX1 vs. other subtypes	Ghazavi et al. 2016
lnc-SPI1-1	ENSG00000255197	down	ETV6-RUNX1 vs. other subtypes	Ghazavi et al. 2016
lnc-PHACTR4-2	ENSG00000242125	down	ETV6-RUNX1 vs. other subtypes	Ghazavi et al. 2016
lnc-CLEC18B-1	ENSG00000261170	down	ETV6-RUNX1 vs. other subtypes	Ghazavi et al. 2016
lnc-AP1B1-1	ENSG00000225465	down	ETV6-RUNX1 vs. other subtypes	Ghazavi et al. 2016
lnc-GJA10-2	ENSG00000226455	down	ETV6-RUNX1 vs. other subtypes	Ghazavi et al. 2016
lnc-CHST12-1		down	ETV6-RUNX1 vs. other subtypes	Ghazavi et al. 2016
lnc-TERF1-1	ENSG00000253636	down	ETV6-RUNX1 vs. other subtypes	Ghazavi et al. 2016
lnc-RP11-181C3.1.1-1	ENSG00000245017	down	ETV6-RUNX1 vs. other subtypes	Ghazavi et al. 2016
lnc-RPS21-1	ENSG00000228812	down	ETV6-RUNX1 vs. other subtypes	Ghazavi et al. 2016
lnc-ZNHIT1-2	ENSG00000232445	down	ETV6-RUNX1 vs. other subtypes	Ghazavi et al. 2016
lnc-DHRS7B-2	ENSG00000236819	down	ETV6-RUNX1 vs. other subtypes	Ghazavi et al. 2016
lnc-IRF2-2		down	ETV6-RUNX1 vs. other subtypes	Ghazavi et al. 2016
lnc-WNT1-2	ENSG00000257913	down	ETV6-RUNX1 vs. other subtypes	Ghazavi et al. 2016
lnc-SPINK4-1	ENSG00000233554	down	ETV6-RUNX1 vs. other subtypes	Ghazavi et al. 2016
lnc-TNK2-2	ENSG00000260261	down	ETV6-RUNX1 vs. other subtypes	Ghazavi et al. 2016
lnc-VEZF1-1	ENSG00000264112	down	ETV6-RUNX1 vs. other subtypes	Ghazavi et al. 2016
lnc-CLEC2D-1	ENSG00000256582	down	ETV6-RUNX1 vs. other subtypes	Ghazavi et al. 2016
lnc-AL355149.1-1	ENSG00000224174	down	ETV6-RUNX1 vs. other subtypes	Ghazavi et al. 2016
lnc-ARL15-1	ENSG00000250447	down	ETV6-RUNX1 vs. other subtypes	Ghazavi et al. 2016
lnc-ZNF276-1	ENSG00000261373	down	ETV6-RUNX1 vs. other subtypes	Ghazavi et al. 2016
lnc-FRG1-5	ENSG00000245685	down	ETV6-RUNX1 vs. other subtypes	Ghazavi et al. 2016
lnc-ESRP2-1	ENSG00000260891	down	ETV6-RUNX1 vs. other subtypes	Ghazavi et al. 2016
lnc-NT5DC3-1	ENSG00000257681	down	ETV6-RUNX1 vs. other subtypes	Ghazavi et al. 2016
lnc-AC069257.9.1-4	ENSG00000242086	down	ETV6-RUNX1 vs. other subtypes	Ghazavi et al. 2016
lnc-PTPRC-1	ENSG00000225172	down	ETV6-RUNX1 vs. other subtypes	Ghazavi et al. 2016
lnc-NPIP-1	ENSG00000260735	down	ETV6-RUNX1 vs. other subtypes	Ghazavi et al. 2016
lnc-BX284668.1-1	ENSG00000238142	down	ETV6-RUNX1 vs. other subtypes	Ghazavi et al. 2016
lnc-PLA2G2C-1	ENSG00000187980	down	ETV6-RUNX1 vs. other subtypes	Ghazavi et al. 2016
lnc-TMED7-2	ENSG00000249021	down	ETV6-RUNX1 vs. other subtypes	Ghazavi et al. 2016
lnc-MDM1-1	ENSG00000251301	down	ETV6-RUNX1 vs. other subtypes	Ghazavi et al. 2016
lnc-KIAA0226-1	ENSG00000236833	down	ETV6-RUNX1 vs. other subtypes	Ghazavi et al. 2016
lnc-TSSC1-1	ENSG00000236760	down	ETV6-RUNX1 vs. other subtypes	Ghazavi et al. 2016
lnc-ANKRD27-1	ENSG00000267475	down	ETV6-RUNX1 vs. other subtypes	Ghazavi et al. 2016
lnc-AC069257.9.1-5	ENSG00000272792	down	ETV6-RUNX1 vs. other subtypes	Ghazavi et al. 2016
lnc-C3orf32-3	ENSG00000231401	down	ETV6-RUNX1 vs. other subtypes	Ghazavi et al. 2016
lnc-HRH4-4	ENSG00000265485	down	ETV6-RUNX1 vs. other subtypes	Ghazavi et al. 2016
lnc-AC069257.9.1-6		down	ETV6-RUNX1 vs. other subtypes	Ghazavi et al. 2016
lnc-RHPN1-3	ENSG00000254338	down	ETV6-RUNX1 vs. other subtypes	Ghazavi et al. 2016
lnc-CD83-5		down	ETV6-RUNX1 vs. other subtypes	Ghazavi et al. 2016
lnc-KRT80-6	ENSG00000260122	down	ETV6-RUNX1 vs. other subtypes	Ghazavi et al. 2016
lnc-CLINT1-2	ENSG00000253449	down	ETV6-RUNX1 vs. other subtypes	Ghazavi et al. 2016
lnc-TFEB-1	ENSG00000234753	down	ETV6-RUNX1 vs. other subtypes	Ghazavi et al. 2016
lnc-GPSM2-1	ENSG00000203897	down	ETV6-RUNX1 vs. other subtypes	Ghazavi et al. 2016
lnc-LAMA5-1	ENSG00000226332	down	ETV6-RUNX1 vs. other subtypes	Ghazavi et al. 2016
lnc-KIAA0226-2	ENSG00000287286	down	ETV6-RUNX1 vs. other subtypes	Ghazavi et al. 2016
lnc-CCDC69-1	ENSG00000285420	down	ETV6-RUNX1 vs. other subtypes	Ghazavi et al. 2016
lnc-HEATR2-3	ENSG00000223855	down	ETV6-RUNX1 vs. other subtypes	Ghazavi et al. 2016
lnc-CASC1-1	ENSG00000258449	down	ETV6-RUNX1 vs. other subtypes	Ghazavi et al. 2016
lnc-PRSS23-3	ENSG00000254731	down	ETV6-RUNX1 vs. other subtypes	Ghazavi et al. 2016
lnc-CXXC11-1	ENSG00000235151	down	ETV6-RUNX1 vs. other subtypes	Ghazavi et al. 2016
lnc-LRMP-1	ENSG00000258879	down	ETV6-RUNX1 vs. other subtypes	Ghazavi et al. 2016
lnc-LSM11-3	ENSG00000253424	down	ETV6-RUNX1 vs. other subtypes	Ghazavi et al. 2016
lnc-CSTB-1	ENSG00000215458	down	ETV6-RUNX1 vs. other subtypes	Ghazavi et al. 2016
lnc-NDRG4-1	ENSG00000260186	down	ETV6-RUNX1 vs. other subtypes	Ghazavi et al. 2016
lnc-CD300C-1	ENSG00000236770	down	ETV6-RUNX1 vs. other subtypes	Ghazavi et al. 2016
lnc-IMPACT-1	ENSG00000273321	down	ETV6-RUNX1 vs. other subtypes	Ghazavi et al. 2016
lnc-ISCU-1	ENSG00000257221	down	ETV6-RUNX1 vs. other subtypes	Ghazavi et al. 2016
lnc-ATP6V1G3-3	ENSG00000233410	down	ETV6-RUNX1 vs. other subtypes	Ghazavi et al. 2016
lnc-PWWP2B-1	ENSG00000231705	down	ETV6-RUNX1 vs. other subtypes	Ghazavi et al. 2016
lnc-SEPT9-3	ENSG00000267506	down	ETV6-RUNX1 vs. other subtypes	Ghazavi et al. 2016
lnc-SARDH-1	ENSG00000225756	down	ETV6-RUNX1 vs. other subtypes	Ghazavi et al. 2016
lnc-EPHA7-2		down	ETV6-RUNX1 vs. other subtypes	Ghazavi et al. 2016
lnc-C2orf55-1	ENSG00000226791	down	ETV6-RUNX1 vs. other subtypes	Ghazavi et al. 2016
lnc-EPHA7-3	ENSG00000261038	down	ETV6-RUNX1 vs. other subtypes	Ghazavi et al. 2016
lnc-C21orf67-2	ENSG00000234880	down	ETV6-RUNX1 vs. other subtypes	Ghazavi et al. 2016
lnc-FAM27B-2	ENSG00000225411	down	ETV6-RUNX1 vs. other subtypes	Ghazavi et al. 2016
lnc-SERINC2-1		down	ETV6-RUNX1 vs. other subtypes	Ghazavi et al. 2016
lnc-NDUFS6-5	ENSG00000248994	down	ETV6-RUNX1 vs. other subtypes	Ghazavi et al. 2016
lnc-QSOX2-1	ENSG00000283769	down	ETV6-RUNX1 vs. other subtypes	Ghazavi et al. 2016
lnc-ASPH-5	ENSG00000254802	down	ETV6-RUNX1 vs. other subtypes	Ghazavi et al. 2016
lnc-KCNA3-1	ENSG00000259834	down	ETV6-RUNX1 vs. other subtypes	Ghazavi et al. 2016
lnc-MS4A6A-1	ENSG00000254952	down	ETV6-RUNX1 vs. other subtypes	Ghazavi et al. 2016
lnc-MBL2-3	ENSG00000231131	down	ETV6-RUNX1 vs. other subtypes	Ghazavi et al. 2016
lnc-BCL11A-2	ENSG00000228590	down	ETV6-RUNX1 vs. other subtypes	Ghazavi et al. 2016
lnc-C21orf67-2	ENST00000439088;	down	ETV6-RUNX1 vs. other subtypes	Ghazavi et al. 2016
lnc-TINAGL1-1		down	ETV6-RUNX1 vs. other subtypes	Ghazavi et al. 2016
lnc-ATP6V1G3-1	ENSG00000223881	down	ETV6-RUNX1 vs. other subtypes	Ghazavi et al. 2016
lnc-GSDMC-1	ENSG00000229140	down	ETV6-RUNX1 vs. other subtypes	Ghazavi et al. 2016
RP11-426L16.8	ENSG00000215866	up	DUX4 like vs. other subtypes	James et al. 2019 (36)
RP11-429E11.2	ENSG00000225106	up	DUX4 like vs. other subtypes	James et al. 2019
RP3-512E2.2	ENSG00000226455	up	DUX4 like vs. other subtypes	James et al. 2019
RP11-1078H9.5	ENSG00000259163	up	DUX4 like vs. other subtypes	James et al. 2019
RP11-659G9.3	ENSG00000254698	up	DUX4 like vs. other subtypes	James et al. 2019
SPTY2D1-AS1	ENSG00000247595	up	DUX4 like vs. other subtypes	James et al. 2019
RP11-379B8.1	ENSG00000226453	up	DUX4 like vs. other subtypes	James et al. 2019
RP11-23E10.3	ENSG00000260626	up	DUX4 like vs. other subtypes	James et al. 2019
SEMA3B	ENSG00000012171	up	DUX4 like vs. other subtypes	James et al. 2019
LINC00238	ENSG00000196553	up	DUX4 like vs. other subtypes	James et al. 2019
RP11-677M14.2	ENSG00000255045	up	DUX4 like vs. other subtypes	James et al. 2019
RP11-65J21.3	ENSG00000262454	up	DUX4 like vs. other subtypes	James et al. 2019
WT1-AS	ENSG00000183242	up	DUX4 like vs. other subtypes	James et al. 2019
RP11-25G10.2	ENSG00000232739	up	DUX4 like vs. other subtypes	James et al. 2019
CTD-2568A17.1	ENSG00000261341	up	DUX4 like vs. other subtypes	James et al. 2019
AC007319.1	ENSG00000224063	up	DUX4 like vs. other subtypes	James et al. 2019
CTC-296K1.4	ENSG00000267405	up	DUX4 like vs. other subtypes	James et al. 2019
RP11-619L19.2	ENSG00000267402	up	DUX4 like vs. other subtypes	James et al. 2019
RP11-211N8.7	ENSG00000232827	up	DUX4 like vs. other subtypes	James et al. 2019
KCNQ5-AS1	ENSG00000229154	up	DUX4 like vs. other subtypes	James et al. 2019
RP11-534L6.2	ENSG00000236800	up	DUX4 like vs. other subtypes	James et al. 2019
RP11-196E1.3	ENSG00000254561	up	DUX4 like vs. other subtypes	James et al. 2019
RP11-855A2.3	ENSG00000266717	up	DUX4 like vs. other subtypes	James et al. 2019
CTD-3216D2.5	ENSG00000272945	up	DUX4 like vs. other subtypes	James et al. 2019
GS1-393G12.14	ENSG00000272115	up	DUX4 like vs. other subtypes	James et al. 2019
RP11-382A20.4	ENSG00000259986	up	DUX4 like vs. other subtypes	James et al. 2019
RP11-386G11.5	ENSG00000257913	up	DUX4 like vs. other subtypes	James et al. 2019
NBPF18P	ENSG00000229021	up	DUX4 like vs. other subtypes	James et al. 2019
RP11-91I20.3	ENSG00000228862	up	DUX4 like vs. other subtypes	James et al. 2019
RP3-525N10.2	ENSG00000230910	up	DUX4 like vs. other subtypes	James et al. 2019
RP11-147N17.1	ENSG00000242428	up	DUX4 like vs. other subtypes	James et al. 2019
RP11-732A19.6	ENSG00000255410	up	DUX4 like vs. other subtypes	James et al. 2019
CTD-2516F10.2	ENSG00000251364	up	DUX4 like vs. other subtypes	James et al. 2019
LINC01096	ENSG00000246095	up	DUX4 like vs. other subtypes	James et al. 2019
PTPRG-AS1	ENSG00000241472	up	DUX4 like vs. other subtypes	James et al. 2019
A1BG-AS1	ENSG00000268895	up	DUX4 like vs. other subtypes	James et al. 2019
RP11-523O18.5	ENSG00000233665	up	DUX4 like vs. other subtypes	James et al. 2019
RP11-38L15.8	ENSG00000272430	up	DUX4 like vs. other subtypes	James et al. 2019
RP11-72M17.1	ENSG00000258561	up	DUX4 like vs. other subtypes	James et al. 2019
CTD-2621I17.6	ENSG00000267522	up	DUX4 like vs. other subtypes	James et al. 2019
RP11-436M15.3	ENSG00000258693	up	DUX4 like vs. other subtypes	James et al. 2019
SENCR	ENSG00000254703	up	DUX4 like vs. other subtypes	James et al. 2019
RP11-57A19.2	ENSG00000246465	up	DUX4 like vs. other subtypes	James et al. 2019
RP11-417E7.2	ENSG00000261039	up	DUX4 like vs. other subtypes	James et al. 2019
RP11-141M1.1	ENSG00000227911	up	DUX4 like vs. other subtypes	James et al. 2019
AC093818.1	ENSG00000225205	up	DUX4 like vs. other subtypes	James et al. 2019
LINC01121	ENSG00000205054	up	DUX4 like vs. other subtypes	James et al. 2019
RP11-204M4.2	ENSG00000204837	up	DUX4 like vs. other subtypes	James et al. 2019
RP11-366M4.3	ENSG00000248329	up	DUX4 like vs. other subtypes	James et al. 2019
INHBA-AS1	ENSG00000224116	up	DUX4 like vs. other subtypes	James et al. 2019
RP11-583F2.5	ENSG00000266598	up	DUX4 like vs. other subtypes	James et al. 2019
RP11-661G16.2	ENSG00000258716	up	DUX4 like vs. other subtypes	James et al. 2019
AC107218.3	ENSG00000197585	up	DUX4 like vs. other subtypes	James et al. 2019
RP11-304F15.3	ENSG00000204584	up	DUX4 like vs. other subtypes	James et al. 2019
CTD-2231H16.1	ENSG00000249430	up	DUX4 like vs. other subtypes	James et al. 2019
RP11-305F18.1	ENSG00000233928	up	DUX4 like vs. other subtypes	James et al. 2019
RP11-672A2.5	ENSG00000255363	up	DUX4 like vs. other subtypes	James et al. 2019
CRYM-AS1	ENSG00000189149	up	DUX4 like vs. other subtypes	James et al. 2019
RP11-332H18.5	ENSG00000267131	up	DUX4 like vs. other subtypes	James et al. 2019
MIR29A	ENSG00000226380	up	DUX4 like vs. other subtypes	James et al. 2019
RP11-182J1.5	ENSG00000256278	up	DUX4 like vs. other subtypes	James et al. 2019
RP11-16L9.4	ENSG00000235492	up	DUX4 like vs. other subtypes	James et al. 2019
RP11-753A21.1	ENSG00000259478	up	DUX4 like vs. other subtypes	James et al. 2019
RP11-654A16.3	ENSG00000259475	up	DUX4 like vs. other subtypes	James et al. 2019
CTD-2187J20.1	ENSG00000251206	up	DUX4 like vs. other subtypes	James et al. 2019
RP11-486L19.2	ENSG00000250685	up	DUX4 like vs. other subtypes	James et al. 2019
LINC00689	ENSG00000231419	up	DUX4 like vs. other subtypes	James et al. 2019
AC133785.1	ENSG00000233221	up	DUX4 like vs. other subtypes	James et al. 2019
AC116609.2	ENSG00000223751	up	DUX4 like vs. other subtypes	James et al. 2019
CASK-AS1	ENSG00000233033	up	DUX4 like vs. other subtypes	James et al. 2019
RP11-611O2.5	ENSG00000257181	up	DUX4 like vs. other subtypes	James et al. 2019
RP11-481J2.2	ENSG00000260186	up	DUX4 like vs. other subtypes	James et al. 2019
RP11-396C23.2	ENSG00000225518	up	DUX4 like vs. other subtypes	James et al. 2019
RP11-158M2.2	ENSG00000259544	up	DUX4 like vs. other subtypes	James et al. 2019
RP4-742J24.2	ENSG00000236526	up	DUX4 like vs. other subtypes	James et al. 2019
CTC-523E23.4	ENSG00000267767	up	DUX4 like vs. other subtypes	James et al. 2019
RP11-735G4.1	ENSG00000226409	up	DUX4 like vs. other subtypes	James et al. 2019
RP4-738P15.1	ENSG00000230725	up	DUX4 like vs. other subtypes	James et al. 2019
PCAT6	ENSG00000228288	up	DUX4 like vs. other subtypes	James et al. 2019
RP4-583P15.11	ENSG00000231208	up	DUX4 like vs. other subtypes	James et al. 2019
AC093326.2	ENSG00000225942	up	DUX4 like vs. other subtypes	James et al. 2019
RP11-480D4.2	ENSG00000249159	up	DUX4 like vs. other subtypes	James et al. 2019
RP11-264E18.1	ENSG00000234640	up	DUX4 like vs. other subtypes	James et al. 2019
LINC00511	ENSG00000227036	up	DUX4 like vs. other subtypes	James et al. 2019
CTD-3032H12.1	ENSG00000259725	up	DUX4 like vs. other subtypes	James et al. 2019
APCDD1L-AS1	ENSG00000231290	up	DUX4 like vs. other subtypes	James et al. 2019
RP11-68I3.4	ENSG00000264290	up	DUX4 like vs. other subtypes	James et al. 2019
LARGE-AS1	ENSG00000224973	up	DUX4 like vs. other subtypes	James et al. 2019
RP11-82O18.2	ENSG00000261523	up	DUX4 like vs. other subtypes	James et al. 2019
SNHG18	ENSG00000250786	up	DUX4 like vs. other subtypes	James et al. 2019
LA16c-349E10.1	ENSG00000262528	up	DUX4 like vs. other subtypes	James et al. 2019
RP11-266O8.1	ENSG00000257060	up	DUX4 like vs. other subtypes	James et al. 2019
TPTEP1	ENSG00000100181	up	DUX4 like vs. other subtypes	James et al. 2019
RP11-91I20.2	ENSG00000254869	up	DUX4 like vs. other subtypes	James et al. 2019
RP11-141M3.5	ENSG00000273328	up	DUX4 like vs. other subtypes	James et al. 2019
FARP1-AS1	ENSG00000231194	up	DUX4 like vs. other subtypes	James et al. 2019
RP3-470B24.5	ENSG00000235994	up	DUX4 like vs. other subtypes	James et al. 2019
LINC00954	ENSG00000228784	up	DUX4 like vs. other subtypes	James et al. 2019
NADK2-AS1	ENSG00000245711	up	DUX4 like vs. other subtypes	James et al. 2019
RP11-382A20.2	ENSG00000260579	up	DUX4 like vs. other subtypes	James et al. 2019
CTD-2223O18.1	ENSG00000258748	up	DUX4 like vs. other subtypes	James et al. 2019
CTD-2234B20.1	ENSG00000249404	up	DUX4 like vs. other subtypes	James et al. 2019
RP11-80H8.4	ENSG00000241679	up	DUX4 like vs. other subtypes	James et al. 2019
AC062029.1	ENSG00000234028	up	DUX4 like vs. other subtypes	James et al. 2019
SPATA41	ENSG00000189419	up	DUX4 like vs. other subtypes	James et al. 2019
LINC00676	ENSG00000234854	up	DUX4 like vs. other subtypes	James et al. 2019
RP11-100K18.1	ENSG00000266213	up	DUX4 like vs. other subtypes	James et al. 2019
IGF2-AS	ENSG00000099869	up	DUX4 like vs. other subtypes	James et al. 2019
CTC-529G1.1	ENSG00000254391	up	DUX4 like vs. other subtypes	James et al. 2019
ISM1-AS1	ENSG00000226263	up	DUX4 like vs. other subtypes	James et al. 2019
WASIR1	ENSG00000185203	up	DUX4 like vs. other subtypes	James et al. 2019
RP11-35O15.1	ENSG00000259424	up	DUX4 like vs. other subtypes	James et al. 2019
RP11-863P13.2	ENSG00000261816	up	DUX4 like vs. other subtypes	James et al. 2019
AC005264.2	ENSG00000267551	up	DUX4 like vs. other subtypes	James et al. 2019
RP1-90L6.2	ENSG00000223704	up	DUX4 like vs. other subtypes	James et al. 2019
AC116614.1	ENSG00000235688	up	DUX4 like vs. other subtypes	James et al. 2019
RP11-134O21.1	ENSG00000254319	up	DUX4 like vs. other subtypes	James et al. 2019
LINC00617	ENSG00000250366	up	DUX4 like vs. other subtypes	James et al. 2019
RP11-897M7.1	ENSG00000256209	up	DUX4 like vs. other subtypes	James et al. 2019
CTB-35F21.1	ENSG00000249526	up	DUX4 like vs. other subtypes	James et al. 2019
RP11-292F22.5	ENSG00000226667	up	DUX4 like vs. other subtypes	James et al. 2019
RP11-545D19.1	ENSG00000233571	up	DUX4 like vs. other subtypes	James et al. 2019
RP3-402G11.26	ENSG00000273253	up	DUX4 like vs. other subtypes	James et al. 2019
RP11-73C9.1	ENSG00000260978	up	DUX4 like vs. other subtypes	James et al. 2019
RP11-332H18.4	ENSG00000267280	up	DUX4 like vs. other subtypes	James et al. 2019
AC002398.5	ENSG00000225872	up	DUX4 like vs. other subtypes	James et al. 2019
RP11-38J22.3	ENSG00000226780	up	DUX4 like vs. other subtypes	James et al. 2019
RP1-167F1.2	ENSG00000226786	up	DUX4 like vs. other subtypes	James et al. 2019
AP003068.9	ENSG00000254501	up	DUX4 like vs. other subtypes	James et al. 2019
RP11-399E6.4	ENSG00000229901	up	DUX4 like vs. other subtypes	James et al. 2019
RP3-337O18.9	ENSG00000271984	up	DUX4 like vs. other subtypes	James et al. 2019
RP11-525G13.2	ENSG00000236364	up	DUX4 like vs. other subtypes	James et al. 2019
RP11-440G5.2	ENSG00000233081	up	DUX4 like vs. other subtypes	James et al. 2019
ZMIZ1-AS1	ENSG00000224596	up	DUX4 like vs. other subtypes	James et al. 2019
RP4-651E10.4	ENSG00000236915	up	DUX4 like vs. other subtypes	James et al. 2019
RP11-164J13.1	ENSG00000258461	up	DUX4 like vs. other subtypes	James et al. 2019
RP11-359D14.2	ENSG00000233860	up	DUX4 like vs. other subtypes	James et al. 2019
CTD-2313P7.1	ENSG00000253236	up	DUX4 like vs. other subtypes	James et al. 2019
CTD-2134A5.3	ENSG00000258914	up	DUX4 like vs. other subtypes	James et al. 2019
RP11-1079H9.1	ENSG00000258912	up	DUX4 like vs. other subtypes	James et al. 2019
AC113607.3	ENSG00000234796	up	DUX4 like vs. other subtypes	James et al. 2019
RP11-528G1.2	ENSG00000234425	up	DUX4 like vs. other subtypes	James et al. 2019
SMAD1-AS2	ENSG00000250582	up	DUX4 like vs. other subtypes	James et al. 2019
RP11-75C9.1	ENSG00000225706	up	DUX4 like vs. other subtypes	James et al. 2019
RP11-815J21.3	ENSG00000259276	up	DUX4 like vs. other subtypes	James et al. 2019
RP11-725G5.2	ENSG00000258630	up	DUX4 like vs. other subtypes	James et al. 2019
ACVR2B-AS1	ENSG00000229589	up	DUX4 like vs. other subtypes	James et al. 2019
U62631.5	ENSG00000269553	up	DUX4 like vs. other subtypes	James et al. 2019
PCDH9-AS2	ENSG00000228842	up	DUX4 like vs. other subtypes	James et al. 2019
RP11-696N14.1	ENSG00000246090	up	DUX4 like vs. other subtypes	James et al. 2019
CTD-2267D19.2	ENSG00000265666	up	DUX4 like vs. other subtypes	James et al. 2019
PART1	ENSG00000152931	up	DUX4 like vs. other subtypes	James et al. 2019
MIR1302-11	ENSG00000259553	up	DUX4 like vs. other subtypes	James et al. 2019
GATA3-AS1	ENSG00000197308	up	DUX4 like vs. other subtypes	James et al. 2019
RP11-638F5.1	ENSG00000204603	up	DUX4 like vs. other subtypes	James et al. 2019
AF127936.3	ENSG00000232884	up	DUX4 like vs. other subtypes	James et al. 2019
RP11-462G22.1	ENSG00000250739	up	DUX4 like vs. other subtypes	James et al. 2019
RP11-13K12.1	ENSG00000267506	up	DUX4 like vs. other subtypes	James et al. 2019
SPANXA2-OT1	ENSG00000226574	up	DUX4 like vs. other subtypes	James et al. 2019
AF127936.5	ENSG00000226751	up	DUX4 like vs. other subtypes	James et al. 2019
AP000487.6	ENSG00000254604	up	DUX4 like vs. other subtypes	James et al. 2019
CTB-66B24.1	ENSG00000267299	up	DUX4 like vs. other subtypes	James et al. 2019
AC114730.5	ENSG00000215023	up	DUX4 like vs. other subtypes	James et al. 2019
RP13-507P19.2	ENSG00000230294	up	DUX4 like vs. other subtypes	James et al. 2019
RP11-624M8.1	ENSG00000237742	up	DUX4 like vs. other subtypes	James et al. 2019
XXbac-B444P24.8	ENSG00000249923	up	DUX4 like vs. other subtypes	James et al. 2019
RP11-378A12.1	ENSG00000249694	up	DUX4 like vs. other subtypes	James et al. 2019
RP11-214O1.1	ENSG00000262786	up	DUX4 like vs. other subtypes	James et al. 2019
CTB-25B13.9	ENSG00000267092	up	DUX4 like vs. other subtypes	James et al. 2019
AC104134.2	ENSG00000225420	up	DUX4 like vs. other subtypes	James et al. 2019
RGMB-AS1	ENSG00000246763	up	DUX4 like vs. other subtypes	James et al. 2019
SMAD1-AS1	ENSG00000250902	up	DUX4 like vs. other subtypes	James et al. 2019
LINC00652	ENSG00000179935	up	DUX4 like vs. other subtypes	James et al. 2019
RP11-830F9.5	ENSG00000259881	up	DUX4 like vs. other subtypes	James et al. 2019
RP11-438N16.1	ENSG00000249550	up	DUX4 like vs. other subtypes	James et al. 2019
AC002467.7	ENSG00000241764	up	DUX4 like vs. other subtypes	James et al. 2019
RP11-57H14.2	ENSG00000233547	up	DUX4 like vs. other subtypes	James et al. 2019
AC073316.1	ENSG00000236708	up	DUX4 like vs. other subtypes	James et al. 2019
AP001172.2	ENSG00000270071	up	DUX4 like vs. other subtypes	James et al. 2019
RP11-815J21.1	ENSG00000259453	up	DUX4 like vs. other subtypes	James et al. 2019
RP11-470P21.2	ENSG00000229312	up	DUX4 like vs. other subtypes	James et al. 2019
RP11-162D9.3	ENSG00000254687	up	DUX4 like vs. other subtypes	James et al. 2019
AL132709.1	ENSG00000230805	up	DUX4 like vs. other subtypes	James et al. 2019
RP11-111F5.3	ENSG00000231212	up	DUX4 like vs. other subtypes	James et al. 2019
RP11-87C12.5	ENSG00000255856	up	DUX4 like vs. other subtypes	James et al. 2019
AC131097.3	ENSG00000233806	up	DUX4 like vs. other subtypes	James et al. 2019
CTD-2571L23.8	ENSG00000268746	up	DUX4 like vs. other subtypes	James et al. 2019
RP11-305L7.1	ENSG00000230537	up	DUX4 like vs. other subtypes	James et al. 2019
CTB-35F21.2	ENSG00000249131	up	DUX4 like vs. other subtypes	James et al. 2019
CTD-2528A14.1	ENSG00000268985	up	DUX4 like vs. other subtypes	James et al. 2019
SNHG14	ENSG00000224078	up	DUX4 like vs. other subtypes	James et al. 2019
RP11-20G13.1	ENSG00000259341	up	DUX4 like vs. other subtypes	James et al. 2019
RP1-122P22.2	ENSG00000233895	up	DUX4 like vs. other subtypes	James et al. 2019
EZR-AS1	ENSG00000233893	up	DUX4 like vs. other subtypes	James et al. 2019
AC007285.7	ENSG00000231519	up	DUX4 like vs. other subtypes	James et al. 2019
RP11-338C15.3	ENSG00000237980	up	DUX4 like vs. other subtypes	James et al. 2019
AC093642.4	ENSG00000226423	up	DUX4 like vs. other subtypes	James et al. 2019
AP001063.1	ENSG00000260256	up	DUX4 like vs. other subtypes	James et al. 2019
AKT3-IT1	ENSG00000228939	up	DUX4 like vs. other subtypes	James et al. 2019
CTD-2540L5.6	ENSG00000245466	up	DUX4 like vs. other subtypes	James et al. 2019
LINC00266-1	ENSG00000149656	up	DUX4 like vs. other subtypes	James et al. 2019
RP11-569G13.2	ENSG00000237212	up	DUX4 like vs. other subtypes	James et al. 2019
RP11-326J18.1	ENSG00000241596	up	DUX4 like vs. other subtypes	James et al. 2019
RP11-326E22.1	ENSG00000254031	up	DUX4 like vs. other subtypes	James et al. 2019
RP11-508N22.8	ENSG00000224761	up	DUX4 like vs. other subtypes	James et al. 2019
AC099754.1	ENSG00000225386	up	DUX4 like vs. other subtypes	James et al. 2019
RP11-166A12.1	ENSG00000251538	up	DUX4 like vs. other subtypes	James et al. 2019
RP4-607I7.1	ENSG00000255521	up	DUX4 like vs. other subtypes	James et al. 2019
AC114808.2	ENSG00000236665	up	DUX4 like vs. other subtypes	James et al. 2019
AC078883.3	ENSG00000232788	up	DUX4 like vs. other subtypes	James et al. 2019
CTC-523E23.11	ENSG00000271109	up	DUX4 like vs. other subtypes	James et al. 2019
RP11-79N23.1	ENSG00000227885	up	DUX4 like vs. other subtypes	James et al. 2019
PVT1	ENSG00000249859	up	DUX4 like vs. other subtypes	James et al. 2019
RP11-328D5.1	ENSG00000226202	up	DUX4 like vs. other subtypes	James et al. 2019
RP11-1033H12.1	ENSG00000258694	up	DUX4 like vs. other subtypes	James et al. 2019
CCND2-AS2	ENSG00000255920	up	DUX4 like vs. other subtypes	James et al. 2019
RP11-111F5.4	ENSG00000204802	up	DUX4 like vs. other subtypes	James et al. 2019
RP11-382E9.1	ENSG00000231718	up	DUX4 like vs. other subtypes	James et al. 2019
RP11-713M15.1	ENSG00000248318	up	DUX4 like vs. other subtypes	James et al. 2019
RP11-320G24.1	ENSG00000236393	up	DUX4 like vs. other subtypes	James et al. 2019
RP11-186F10.2	ENSG00000257761	up	DUX4 like vs. other subtypes	James et al. 2019
SLC9A9-AS2	ENSG00000244493	up	DUX4 like vs. other subtypes	James et al. 2019
RP13-635I23.3	ENSG00000240888	up	DUX4 like vs. other subtypes	James et al. 2019
AGAP1-IT1	ENSG00000235529	up	DUX4 like vs. other subtypes	James et al. 2019
BHLHE40-AS1	ENSG00000235831	up	DUX4 like vs. other subtypes	James et al. 2019
AC073333.8	ENSG00000235837	up	DUX4 like vs. other subtypes	James et al. 2019
STARD13-AS	ENSG00000236581	up	DUX4 like vs. other subtypes	James et al. 2019
RP11-298A8.2	ENSG00000229269	up	DUX4 like vs. other subtypes	James et al. 2019
RAI1-AS1	ENSG00000237328	up	DUX4 like vs. other subtypes	James et al. 2019
RP11-17M16.2	ENSG00000265778	up	DUX4 like vs. other subtypes	James et al. 2019
RP11-158M2.3	ENSG00000259407	up	DUX4 like vs. other subtypes	James et al. 2019
CTA-221G9.11	ENSG00000203280	up	DUX4 like vs. other subtypes	James et al. 2019
CTD-2023M8.1	ENSG00000248693	up	DUX4 like vs. other subtypes	James et al. 2019
CTB-43E15.3	ENSG00000253686	up	DUX4 like vs. other subtypes	James et al. 2019
AC010894.5	ENSG00000237798	up	DUX4 like vs. other subtypes	James et al. 2019
RP11-145E17.2	ENSG00000223729	up	DUX4 like vs. other subtypes	James et al. 2019
RP11-367F23.1	ENSG00000228216	up	DUX4 like vs. other subtypes	James et al. 2019
SRRM2-AS1	ENSG00000205913	up	DUX4 like vs. other subtypes	James et al. 2019
RP11-250B2.3	ENSG00000233967	up	DUX4 like vs. other subtypes	James et al. 2019
SERTAD4-AS1	ENSG00000203706	up	DUX4 like vs. other subtypes	James et al. 2019
ANKRD10-IT1	ENSG00000229152	up	DUX4 like vs. other subtypes	James et al. 2019
RP11-21L23.3	ENSG00000255100	up	DUX4 like vs. other subtypes	James et al. 2019
AC114877.3	ENSG00000234165	up	DUX4 like vs. other subtypes	James et al. 2019
RP11-100E13.1	ENSG00000233384	up	DUX4 like vs. other subtypes	James et al. 2019
RBMS3-AS3	ENSG00000235904	up	DUX4 like vs. other subtypes	James et al. 2019
CPB2-AS1	ENSG00000235903	up	DUX4 like vs. other subtypes	James et al. 2019
RP5-1077I2.3	ENSG00000225956	up	DUX4 like vs. other subtypes	James et al. 2019
SATB2-AS1	ENSG00000225953	up	DUX4 like vs. other subtypes	James et al. 2019
RP11-181K12.2	ENSG00000251687	up	DUX4 like vs. other subtypes	James et al. 2019
RP11-689B22.2	ENSG00000257221	up	DUX4 like vs. other subtypes	James et al. 2019
AC078883.4	ENSG00000226963	up	DUX4 like vs. other subtypes	James et al. 2019
KCNQ5-IT1	ENSG00000233844	up	DUX4 like vs. other subtypes	James et al. 2019
PCDH9-AS4	ENSG00000233840	up	DUX4 like vs. other subtypes	James et al. 2019
FGF13-AS1	ENSG00000226031	up	DUX4 like vs. other subtypes	James et al. 2019
LLNLF-65H9.1	ENSG00000272635	up	DUX4 like vs. other subtypes	James et al. 2019
RP11-503E24.2	ENSG00000254165	up	DUX4 like vs. other subtypes	James et al. 2019
RP11-462G2.2	ENSG00000224349	up	DUX4 like vs. other subtypes	James et al. 2019
RP11-723O4.2	ENSG00000231305	up	DUX4 like vs. other subtypes	James et al. 2019
GDNF-AS1	ENSG00000248587	up	DUX4 like vs. other subtypes	James et al. 2019
LINC00694	ENSG00000225873	up	DUX4 like vs. other subtypes	James et al. 2019
RP11-314O13.1	ENSG00000260896	up	DUX4 like vs. other subtypes	James et al. 2019
RP1-283K11.2	ENSG00000234567	up	DUX4 like vs. other subtypes	James et al. 2019
LINC00399	ENSG00000229792	up	DUX4 like vs. other subtypes	James et al. 2019
RP11-219B4.3	ENSG00000254208	up	DUX4 like vs. other subtypes	James et al. 2019
CTB-49A3.5	ENSG00000249478	up	DUX4 like vs. other subtypes	James et al. 2019
RP3-455J7.4	ENSG00000241666	up	DUX4 like vs. other subtypes	James et al. 2019
RP11-290H9.4	ENSG00000263293	up	DUX4 like vs. other subtypes	James et al. 2019
RP11-398B16.2	ENSG00000233052	up	DUX4 like vs. other subtypes	James et al. 2019
RP11-358M11.3	ENSG00000260172	up	DUX4 like vs. other subtypes	James et al. 2019
STARD4-AS1	ENSG00000246859	up	DUX4 like vs. other subtypes	James et al. 2019
RP11-98D18.9	ENSG00000203288	up	DUX4 like vs. other subtypes	James et al. 2019
RP5-1184F4.5	ENSG00000236772	up	DUX4 like vs. other subtypes	James et al. 2019
RP11-482M8.1	ENSG00000260750	up	DUX4 like vs. other subtypes	James et al. 2019
RP11-125B21.2	ENSG00000236404	up	DUX4 like vs. other subtypes	James et al. 2019
RP3-323P13.2	ENSG00000227954	up	DUX4 like vs. other subtypes	James et al. 2019
RP11-367F23.2	ENSG00000260454	up	DUX4 like vs. other subtypes	James et al. 2019
RP11-43N5.1	ENSG00000255970	up	DUX4 like vs. other subtypes	James et al. 2019
RP11-390F4.6	ENSG00000236924	up	DUX4 like vs. other subtypes	James et al. 2019
RP11-525K10.3	ENSG00000259867	up	DUX4 like vs. other subtypes	James et al. 2019
SLC9A9-AS1	ENSG00000240012	up	DUX4 like vs. other subtypes	James et al. 2019
SNHG7	ENSG00000233016	up	DUX4 like vs. other subtypes	James et al. 2019
RP11-138I1.4	ENSG00000265401	up	DUX4 like vs. other subtypes	James et al. 2019
DIO3OS	ENSG00000258498	up	DUX4 like vs. other subtypes	James et al. 2019
AC002056.5	ENSG00000254499	up	DUX4 like vs. other subtypes	James et al. 2019
SMCR2	ENSG00000223979	up	DUX4 like vs. other subtypes	James et al. 2019
CTB-32O4.2	ENSG00000267498	up	DUX4 like vs. other subtypes	James et al. 2019
KIF25-AS1	ENSG00000229921	up	DUX4 like vs. other subtypes	James et al. 2019
LINC00883	ENSG00000243701	up	DUX4 like vs. other subtypes	James et al. 2019
RP4-803J11.2	ENSG00000237481	up	DUX4 like vs. other subtypes	James et al. 2019
RP11-17J14.2	ENSG00000266495	up	DUX4 like vs. other subtypes	James et al. 2019
RP11-393J16.4	ENSG00000226447	up	DUX4 like vs. other subtypes	James et al. 2019
RP11-527H14.4	ENSG00000263618	up	DUX4 like vs. other subtypes	James et al. 2019
RP11-619L19.1	ENSG00000267028	up	DUX4 like vs. other subtypes	James et al. 2019
LINC00882	ENSG00000242759	up	DUX4 like vs. other subtypes	James et al. 2019
AC144521.1	ENSG00000228956	up	DUX4 like vs. other subtypes	James et al. 2019
RP3-395M20.2	ENSG00000224387	up	DUX4 like vs. other subtypes	James et al. 2019
RP11-63K6.7	ENSG00000232532	up	DUX4 like vs. other subtypes	James et al. 2019
RP5-1139B12.4	ENSG00000270110	up	DUX4 like vs. other subtypes	James et al. 2019
RP11-728K20.2	ENSG00000260555	up	DUX4 like vs. other subtypes	James et al. 2019
GAS5	ENSG00000234741	up	DUX4 like vs. other subtypes	James et al. 2019
RP11-673P17.4	ENSG00000261045	up	DUX4 like vs. other subtypes	James et al. 2019
CTB-49A3.2	ENSG00000248245	up	DUX4 like vs. other subtypes	James et al. 2019
AC139100.3	ENSG00000267251	up	DUX4 like vs. other subtypes	James et al. 2019
AC135048.13	ENSG00000261487	up	DUX4 like vs. other subtypes	James et al. 2019
RP11-678G15.2	ENSG00000266767	up	DUX4 like vs. other subtypes	James et al. 2019
RP11-508N22.9	ENSG00000241125	up	DUX4 like vs. other subtypes	James et al. 2019
CTD-2619J13.8	ENSG00000268230	up	DUX4 like vs. other subtypes	James et al. 2019
AC091814.3	ENSG00000231560	up	DUX4 like vs. other subtypes	James et al. 2019
RP5-1024N4.4	ENSG00000272491	up	DUX4 like vs. other subtypes	James et al. 2019
RP11-38J22.6	ENSG00000240754	up	DUX4 like vs. other subtypes	James et al. 2019
RP11-224O19.2	ENSG00000232480	up	DUX4 like vs. other subtypes	James et al. 2019
RP11-789C17.3	ENSG00000266149	up	DUX4 like vs. other subtypes	James et al. 2019
RP11-719K4.6	ENSG00000261695	up	DUX4 like vs. other subtypes	James et al. 2019
SPACA6P	ENSG00000182310	up	DUX4 like vs. other subtypes	James et al. 2019
SMARCA5-AS1	ENSG00000245112	up	DUX4 like vs. other subtypes	James et al. 2019
RP11-543C4.3	ENSG00000258672	up	DUX4 like vs. other subtypes	James et al. 2019
RP11-1078H9.1	ENSG00000258678	up	DUX4 like vs. other subtypes	James et al. 2019
CTD-2555K7.4	ENSG00000228313	up	DUX4 like vs. other subtypes	James et al. 2019
CTC-523E23.8	ENSG00000270876	up	DUX4 like vs. other subtypes	James et al. 2019
AC010884.1	ENSG00000224509	up	DUX4 like vs. other subtypes	James et al. 2019
RP1-293L8.2	ENSG00000224506	up	DUX4 like vs. other subtypes	James et al. 2019
LINC00643	ENSG00000186369	up	DUX4 like vs. other subtypes	James et al. 2019
AC004837.5	ENSG00000228554	up	DUX4 like vs. other subtypes	James et al. 2019
RP11-264E20.1	ENSG00000255465	up	DUX4 like vs. other subtypes	James et al. 2019
RP3-393E18.2	ENSG00000237927	up	DUX4 like vs. other subtypes	James et al. 2019
NAMA	ENSG00000271086	up	DUX4 like vs. other subtypes	James et al. 2019
LINC00487	ENSG00000205837	up	DUX4 like vs. other subtypes	James et al. 2019
RP11-809C18.3	ENSG00000225140	up	DUX4 like vs. other subtypes	James et al. 2019
RP11-328J6.1	ENSG00000257703	up	DUX4 like vs. other subtypes	James et al. 2019
RP11-982M15.5	ENSG00000258858	up	DUX4 like vs. other subtypes	James et al. 2019
HLA-DQB1-AS1	ENSG00000223534	up	DUX4 like vs. other subtypes	James et al. 2019
CTD-2357A8.3	ENSG00000267123	up	DUX4 like vs. other subtypes	James et al. 2019
RP11-628E19.2	ENSG00000254357	up	DUX4 like vs. other subtypes	James et al. 2019
RP11-277P12.20	ENSG00000245648	up	DUX4 like vs. other subtypes	James et al. 2019
RP11-80H8.3	ENSG00000243733	up	DUX4 like vs. other subtypes	James et al. 2019
RP1-90L6.3	ENSG00000235271	up	DUX4 like vs. other subtypes	James et al. 2019
MIR17HG	ENSG00000215417	up	DUX4 like vs. other subtypes	James et al. 2019
CTB-25B13.6	ENSG00000267715	up	DUX4 like vs. other subtypes	James et al. 2019
RP1-261D10.2	ENSG00000259146	up	DUX4 like vs. other subtypes	James et al. 2019
RP11-262H14.4	ENSG00000170161	up	DUX4 like vs. other subtypes	James et al. 2019
RP11-883A18.3	ENSG00000265728	up	DUX4 like vs. other subtypes	James et al. 2019
RP11-676J12.8	ENSG00000262434	up	DUX4 like vs. other subtypes	James et al. 2019
TMCC1-AS1	ENSG00000271270	up	DUX4 like vs. other subtypes	James et al. 2019
MYLK-AS2	ENSG00000250174	up	DUX4 like vs. other subtypes	James et al. 2019
RP11-435B5.3	ENSG00000242569	up	DUX4 like vs. other subtypes	James et al. 2019
RP11-260O18.1	ENSG00000239440	up	DUX4 like vs. other subtypes	James et al. 2019
GS1-57L11.1	ENSG00000253853	up	DUX4 like vs. other subtypes	James et al. 2019
RP11-82L18.2	ENSG00000224945	up	DUX4 like vs. other subtypes	James et al. 2019
AC006378.2	ENSG00000236861	up	DUX4 like vs. other subtypes	James et al. 2019
RP11-486O13.2	ENSG00000258422	up	DUX4 like vs. other subtypes	James et al. 2019
RP11-312B8.1	ENSG00000237436	up	DUX4 like vs. other subtypes	James et al. 2019
RP11-685M7.5	ENSG00000255125	up	DUX4 like vs. other subtypes	James et al. 2019
JARID2-AS1	ENSG00000235488	up	DUX4 like vs. other subtypes	James et al. 2019
RP11-62C7.2	ENSG00000259278	up	DUX4 like vs. other subtypes	James et al. 2019
RP11-345M22.1	ENSG00000260876	up	DUX4 like vs. other subtypes	James et al. 2019
RP11-649G15.2	ENSG00000253582	up	DUX4 like vs. other subtypes	James et al. 2019
RP11-15H20.6	ENSG00000213971	up	DUX4 like vs. other subtypes	James et al. 2019
CTD-3224K15.2	ENSG00000250635	up	DUX4 like vs. other subtypes	James et al. 2019
RP11-13K12.5	ENSG00000267466	up	DUX4 like vs. other subtypes	James et al. 2019
ZEB2-AS1	ENSG00000238057	up	DUX4 like vs. other subtypes	James et al. 2019
RP11-81H14.2	ENSG00000251301	up	DUX4 like vs. other subtypes	James et al. 2019
RP1-232L24.3	ENSG00000231533	up	DUX4 like vs. other subtypes	James et al. 2019
RP11-446J8.1	ENSG00000248138	up	DUX4 like vs. other subtypes	James et al. 2019
RP1-140A9.1	ENSG00000231050	up	DUX4 like vs. other subtypes	James et al. 2019
RP11-676J15.1	ENSG00000263958	up	DUX4 like vs. other subtypes	James et al. 2019
RP11-480D4.1	ENSG00000245729	up	DUX4 like vs. other subtypes	James et al. 2019
RP5-1063M23.1	ENSG00000250770	up	DUX4 like vs. other subtypes	James et al. 2019
LINC01006	ENSG00000182648	up	DUX4 like vs. other subtypes	James et al. 2019
AC011284.3	ENSG00000236510	up	DUX4 like vs. other subtypes	James et al. 2019
PCDH9-AS3	ENSG00000225263	up	DUX4 like vs. other subtypes	James et al. 2019
RP13-895J2.7	ENSG00000255916	up	DUX4 like vs. other subtypes	James et al. 2019
CTD-2651B20.7	ENSG00000259932	up	DUX4 like vs. other subtypes	James et al. 2019
RP11-171A24.3	ENSG00000224825	up	DUX4 like vs. other subtypes	James et al. 2019
RP11-575A19.2	ENSG00000238246	up	DUX4 like vs. other subtypes	James et al. 2019
RP11-1260E13.1	ENSG00000262920	up	DUX4 like vs. other subtypes	James et al. 2019
CTD-2341M24.1	ENSG00000258733	up	DUX4 like vs. other subtypes	James et al. 2019
LINC00637	ENSG00000258735	up	DUX4 like vs. other subtypes	James et al. 2019
RP11-712B9.2	ENSG00000245552	up	DUX4 like vs. other subtypes	James et al. 2019
RP11-1191J2.2	ENSG00000242686	up	DUX4 like vs. other subtypes	James et al. 2019
AC006129.1	ENSG00000268355	up	DUX4 like vs. other subtypes	James et al. 2019
AP001422.3	ENSG00000231231	up	DUX4 like vs. other subtypes	James et al. 2019
RP11-963H4.3	ENSG00000263508	up	DUX4 like vs. other subtypes	James et al. 2019
CTB-35F21.3	ENSG00000251387	up	DUX4 like vs. other subtypes	James et al. 2019
AC104655.3	ENSG00000226508	up	DUX4 like vs. other subtypes	James et al. 2019
RP11-446H18.5	ENSG00000239828	up	DUX4 like vs. other subtypes	James et al. 2019
LINC01059	ENSG00000255414	up	DUX4 like vs. other subtypes	James et al. 2019
RP11-385J1.2	ENSG00000237978	up	DUX4 like vs. other subtypes	James et al. 2019
RP11-475I24.3	ENSG00000237357	up	DUX4 like vs. other subtypes	James et al. 2019
CTC-523E23.5	ENSG00000269086	up	DUX4 like vs. other subtypes	James et al. 2019
RP11-85B7.2	ENSG00000262966	up	DUX4 like vs. other subtypes	James et al. 2019
RP11-527H14.6	ENSG00000265786	up	DUX4 like vs. other subtypes	James et al. 2019
RP11-563N6.6	ENSG00000228403	up	DUX4 like vs. other subtypes	James et al. 2019
RP11-251M1.1	ENSG00000228401	up	DUX4 like vs. other subtypes	James et al. 2019
RP11-465M18.1	ENSG00000232920	up	DUX4 like vs. other subtypes	James et al. 2019
GFOD1-AS1	ENSG00000237786	up	DUX4 like vs. other subtypes	James et al. 2019
RP11-278A23.2	ENSG00000260671	up	DUX4 like vs. other subtypes	James et al. 2019
RP11-744N12.3	ENSG00000245008	up	DUX4 like vs. other subtypes	James et al. 2019
RP11-13K12.2	ENSG00000267665	up	DUX4 like vs. other subtypes	James et al. 2019
AF131215.3	ENSG00000254936	up	DUX4 like vs. other subtypes	James et al. 2019
ADARB2-AS1	ENSG00000205696	up	DUX4 like vs. other subtypes	James et al. 2019
RP4-760C5.3	ENSG00000231081	up	DUX4 like vs. other subtypes	James et al. 2019
LINC01115	ENSG00000237667	up	DUX4 like vs. other subtypes	James et al. 2019
SLIT2-IT1	ENSG00000248228	up	DUX4 like vs. other subtypes	James et al. 2019
AC003090.1	ENSG00000223561	up	DUX4 like vs. other subtypes	James et al. 2019
AC015977.6	ENSG00000225378	up	DUX4 like vs. other subtypes	James et al. 2019
RP11-554F20.1	ENSG00000237461	up	DUX4 like vs. other subtypes	James et al. 2019
AC009499.1	ENSG00000203386	up	DUX4 like vs. other subtypes	James et al. 2019
RP11-854K16.3	ENSG00000260986	up	DUX4 like vs. other subtypes	James et al. 2019
LINC00930	ENSG00000258647	up	DUX4 like vs. other subtypes	James et al. 2019
RP11-484L8.1	ENSG00000267764	up	DUX4 like vs. other subtypes	James et al. 2019
RP11-369K17.1	ENSG00000253619	up	DUX4 like vs. other subtypes	James et al. 2019
MIR1302-10	ENSG00000243485	up	DUX4 like vs. other subtypes	James et al. 2019
LINC01088	ENSG00000249307	up	DUX4 like vs. other subtypes	James et al. 2019
C9orf106	ENSG00000179082	up	DUX4 like vs. other subtypes	James et al. 2019
AC079776.1	ENSG00000229536	up	DUX4 like vs. other subtypes	James et al. 2019
RP11-677M14.3	ENSG00000250073	up	DUX4 like vs. other subtypes	James et al. 2019
LINC00176	ENSG00000196421	up	DUX4 like vs. other subtypes	James et al. 2019
RP11-335K5.2	ENSG00000259555	up	DUX4 like vs. other subtypes	James et al. 2019
RP11-211N8.2	ENSG00000226007	up	DUX4 like vs. other subtypes	James et al. 2019
CTC-340A15.2	ENSG00000241956	up	DUX4 like vs. other subtypes	James et al. 2019
RP11-395N3.2	ENSG00000272622	up	DUX4 like vs. other subtypes	James et al. 2019
CTD-2619J13.9	ENSG00000268049	up	DUX4 like vs. other subtypes	James et al. 2019
AC000036.4	ENSG00000225929	up	DUX4 like vs. other subtypes	James et al. 2019
AC107072.2	ENSG00000231335	up	DUX4 like vs. other subtypes	James et al. 2019
AF064858.6	ENSG00000205622	up	DUX4 like vs. other subtypes	James et al. 2019
LINC01091	ENSG00000249464	up	DUX4 like vs. other subtypes	James et al. 2019
CTB-3M24.3	ENSG00000250409	up	DUX4 like vs. other subtypes	James et al. 2019
RP1-30E17.2	ENSG00000225689	up	DUX4 like vs. other subtypes	James et al. 2019
AC004870.3	ENSG00000229192	up	DUX4 like vs. other subtypes	James et al. 2019
AC074212.5	ENSG00000259605	up	DUX4 like vs. other subtypes	James et al. 2019
LA16c-444G7.2	ENSG00000260420	up	DUX4 like vs. other subtypes	James et al. 2019
AC093642.3	ENSG00000237940	up	DUX4 like vs. other subtypes	James et al. 2019
CTD-2134A5.4	ENSG00000258534	up	DUX4 like vs. other subtypes	James et al. 2019
RP11-267C16.1	ENSG00000227115	up	DUX4 like vs. other subtypes	James et al. 2019
CTA-85E5.10	ENSG00000227117	up	DUX4 like vs. other subtypes	James et al. 2019
CTD-2587H24.5	ENSG00000267577	up	DUX4 like vs. other subtypes	James et al. 2019
RP11-1055B8.4	ENSG00000262877	up	DUX4 like vs. other subtypes	James et al. 2019
CTD-2561B21.11	ENSG00000262873	up	DUX4 like vs. other subtypes	James et al. 2019
SNORD116-20	ENSG00000261069	up	DUX4 like vs. other subtypes	James et al. 2019
AC091814.2	ENSG00000225231	up	DUX4 like vs. other subtypes	James et al. 2019
RP11-395G23.3	ENSG00000254615	up	DUX4 like vs. other subtypes	James et al. 2019
AC145110.1	ENSG00000253490	up	DUX4 like vs. other subtypes	James et al. 2019
RP11-1157N2__B.2	ENSG00000265737	up	DUX4 like vs. other subtypes	James et al. 2019
AC068499.10	ENSG00000268650	up	DUX4 like vs. other subtypes	James et al. 2019
RP11-138M12.1	ENSG00000228704	up	DUX4 like vs. other subtypes	James et al. 2019
RP11-1081L13.4	ENSG00000254966	up	DUX4 like vs. other subtypes	James et al. 2019
STARD13-IT1	ENSG00000230300	up	DUX4 like vs. other subtypes	James et al. 2019
SRD5A3-AS1	ENSG00000249700	up	DUX4 like vs. other subtypes	James et al. 2019
WI2-85898F10.1	ENSG00000235091	up	DUX4 like vs. other subtypes	James et al. 2019
RP11-308N19.1	ENSG00000234323	up	DUX4 like vs. other subtypes	James et al. 2019
RP11-849H4.4	ENSG00000251143	up	DUX4 like vs. other subtypes	James et al. 2019
RP11-565A3.2	ENSG00000250590	up	DUX4 like vs. other subtypes	James et al. 2019
AC108462.1	ENSG00000233553	up	DUX4 like vs. other subtypes	James et al. 2019
RP1-266L20.2	ENSG00000232640	up	DUX4 like vs. other subtypes	James et al. 2019
LINC01138	ENSG00000215863	down	DUX4 like vs. other subtypes	James et al. 2019
AC061992.2	ENSG00000267737	down	DUX4 like vs. other subtypes	James et al. 2019
RP11-327P2.5	ENSG00000231856	down	DUX4 like vs. other subtypes	James et al. 2019
RP4-794H19.4	ENSG00000230812	down	DUX4 like vs. other subtypes	James et al. 2019
EGOT	ENSG00000235947	down	DUX4 like vs. other subtypes	James et al. 2019
RP11-1197K16.2	ENSG00000262339	down	DUX4 like vs. other subtypes	James et al. 2019
RP11-335I12.2	ENSG00000256072	down	DUX4 like vs. other subtypes	James et al. 2019
CTD-2006K23.2	ENSG00000264659	down	DUX4 like vs. other subtypes	James et al. 2019
RP11-1094M14.5	ENSG00000267074	down	DUX4 like vs. other subtypes	James et al. 2019
RP11-461F16.3	ENSG00000257910	down	DUX4 like vs. other subtypes	James et al. 2019
RP11-96H19.1	ENSG00000257261	down	DUX4 like vs. other subtypes	James et al. 2019
LINC00877	ENSG00000241163	down	DUX4 like vs. other subtypes	James et al. 2019
RP11-168K11.2	ENSG00000237073	down	DUX4 like vs. other subtypes	James et al. 2019
CTD-2012J19.3	ENSG00000271119	down	DUX4 like vs. other subtypes	James et al. 2019
ST7-AS1	ENSG00000227199	down	DUX4 like vs. other subtypes	James et al. 2019
RP13-16H11.5	ENSG00000235843	down	DUX4 like vs. other subtypes	James et al. 2019
AC093901.1	ENSG00000226856	down	DUX4 like vs. other subtypes	James et al. 2019
RP11-228B15.4	ENSG00000225032	down	DUX4 like vs. other subtypes	James et al. 2019
NAV2-AS2	ENSG00000254453	down	DUX4 like vs. other subtypes	James et al. 2019
RP11-63E5.6	ENSG00000249868	down	DUX4 like vs. other subtypes	James et al. 2019
AC011513.4	ENSG00000268833	down	DUX4 like vs. other subtypes	James et al. 2019
RP13-494C23.1	ENSG00000251009	down	DUX4 like vs. other subtypes	James et al. 2019
CTB-39G8.3	ENSG00000267344	down	DUX4 like vs. other subtypes	James et al. 2019
RP11-353N4.4	ENSG00000223759	down	DUX4 like vs. other subtypes	James et al. 2019
RP11-127B16.1	ENSG00000220908	down	DUX4 like vs. other subtypes	James et al. 2019
RP11-160E2.16	ENSG00000236022	down	DUX4 like vs. other subtypes	James et al. 2019
AC106900.6	ENSG00000224638	down	DUX4 like vs. other subtypes	James et al. 2019
RP11-53B2.3	ENSG00000267136	down	DUX4 like vs. other subtypes	James et al. 2019
CACNA1C-AS2	ENSG00000256271	down	DUX4 like vs. other subtypes	James et al. 2019
KB-1460A1.3	ENSG00000253737	down	DUX4 like vs. other subtypes	James et al. 2019
RP11-13N13.2	ENSG00000263350	down	DUX4 like vs. other subtypes	James et al. 2019
DIAPH2-AS1	ENSG00000236256	down	DUX4 like vs. other subtypes	James et al. 2019
RP5-901A4.1	ENSG00000255306	down	DUX4 like vs. other subtypes	James et al. 2019
RP11-126K15.1	ENSG00000265380	down	DUX4 like vs. other subtypes	James et al. 2019
TNRC6C-AS1	ENSG00000204282	down	DUX4 like vs. other subtypes	James et al. 2019
AC016735.3	ENSG00000233978	down	DUX4 like vs. other subtypes	James et al. 2019
RP1-197B17.3	ENSG00000257433	down	DUX4 like vs. other subtypes	James et al. 2019
AF064858.10	ENSG00000237609	down	DUX4 like vs. other subtypes	James et al. 2019
LINC00630	ENSG00000223546	down	DUX4 like vs. other subtypes	James et al. 2019
VPS9D1-AS1	ENSG00000261373	down	DUX4 like vs. other subtypes	James et al. 2019
CCDC26	ENSG00000229140	down	DUX4 like vs. other subtypes	James et al. 2019
RP11-75L1.1	ENSG00000256582	down	DUX4 like vs. other subtypes	James et al. 2019
TRBV11-2	ENSG00000241657	down	DUX4 like vs. other subtypes	James et al. 2019
PHKA2-AS1	ENSG00000237836	down	DUX4 like vs. other subtypes	James et al. 2019
RP11-149I23.3	ENSG00000232110	down	DUX4 like vs. other subtypes	James et al. 2019
IFNG-AS1	ENSG00000255733	down	DUX4 like vs. other subtypes	James et al. 2019
LINC01001	ENSG00000230724	down	DUX4 like vs. other subtypes	James et al. 2019
RP3-475N16.1	ENSG00000231113	down	DUX4 like vs. other subtypes	James et al. 2019
E2F3-IT1	ENSG00000224707	down	DUX4 like vs. other subtypes	James et al. 2019
AP001065.15	ENSG00000228709	down	DUX4 like vs. other subtypes	James et al. 2019
LINC00869	ENSG00000226067	down	DUX4 like vs. other subtypes	James et al. 2019
RP11-433A10.2	ENSG00000242618	down	DUX4 like vs. other subtypes	James et al. 2019
RP11-206L10.4	ENSG00000229905	down	DUX4 like vs. other subtypes	James et al. 2019
RP11-297C4.3	ENSG00000260487	down	DUX4 like vs. other subtypes	James et al. 2019
ITGB2-AS1	ENSG00000227039	down	DUX4 like vs. other subtypes	James et al. 2019
CELF2-AS1	ENSG00000181800	down	DUX4 like vs. other subtypes	James et al. 2019
RP11-430C7.4	ENSG00000240710	down	DUX4 like vs. other subtypes	James et al. 2019
RP11-58E21.3	ENSG00000258929	down	DUX4 like vs. other subtypes	James et al. 2019
RP11-47I22.1	ENSG00000258926	down	DUX4 like vs. other subtypes	James et al. 2019
RP3-327A19.5	ENSG00000227285	down	DUX4 like vs. other subtypes	James et al. 2019
CTC-297N7.10	ENSG00000263388	down	DUX4 like vs. other subtypes	James et al. 2019
RP11-582J16.4	ENSG00000251034	down	DUX4 like vs. other subtypes	James et al. 2019
RP11-97E7.2	ENSG00000249297	down	DUX4 like vs. other subtypes	James et al. 2019
LINC00707	ENSG00000238266	down	DUX4 like vs. other subtypes	James et al. 2019
RP1-62O9.3	ENSG00000177369	down	DUX4 like vs. other subtypes	James et al. 2019
RP11-497G19.1	ENSG00000257883	down	DUX4 like vs. other subtypes	James et al. 2019
VIPR1-AS1	ENSG00000232354	down	DUX4 like vs. other subtypes	James et al. 2019
RP11-403I13.8	ENSG00000235999	down	DUX4 like vs. other subtypes	James et al. 2019
RP11-298E2.2	ENSG00000237734	down	DUX4 like vs. other subtypes	James et al. 2019
LINC00266-4P	ENSG00000228786	down	DUX4 like vs. other subtypes	James et al. 2019
RP11-326C3.12	ENSG00000255328	down	DUX4 like vs. other subtypes	James et al. 2019
RP11-18H21.1	ENSG00000245954	down	DUX4 like vs. other subtypes	James et al. 2019
RP11-206L10.3	ENSG00000235373	down	DUX4 like vs. other subtypes	James et al. 2019
CTD-2023N9.1	ENSG00000250961	down	DUX4 like vs. other subtypes	James et al. 2019
RP11-691H4.4	ENSG00000267694	down	DUX4 like vs. other subtypes	James et al. 2019
RP11-30P6.6	ENSG00000234155	down	DUX4 like vs. other subtypes	James et al. 2019
LL0XNC01-237H1.2	ENSG00000239407	down	DUX4 like vs. other subtypes	James et al. 2019
RP11-318M2.2	ENSG00000247081	down	DUX4 like vs. other subtypes	James et al. 2019
CTD-2281E23.1	ENSG00000253640	down	DUX4 like vs. other subtypes	James et al. 2019
RP11-20D14.3	ENSG00000255829	down	DUX4 like vs. other subtypes	James et al. 2019
RP3-323N1.2	ENSG00000230322	down	DUX4 like vs. other subtypes	James et al. 2019
AC034220.3	ENSG00000233006	down	DUX4 like vs. other subtypes	James et al. 2019
RP11-455F5.5	ENSG00000261416	down	DUX4 like vs. other subtypes	James et al. 2019
RP11-114N19.3	ENSG00000258999	down	DUX4 like vs. other subtypes	James et al. 2019
AC015969.3	ENSG00000203395	down	DUX4 like vs. other subtypes	James et al. 2019
RP11-421F16.3	ENSG00000247903	down	DUX4 like vs. other subtypes	James et al. 2019
MIAT	ENSG00000225783	down	DUX4 like vs. other subtypes	James et al. 2019
RP3-416J7.4	ENSG00000263667	down	DUX4 like vs. other subtypes	James et al. 2019
RP11-497G19.2	ENSG00000257654	down	DUX4 like vs. other subtypes	James et al. 2019
AF129075.5	ENSG00000231125	down	DUX4 like vs. other subtypes	James et al. 2019
RP11-282K24.3	ENSG00000253284	down	DUX4 like vs. other subtypes	James et al. 2019
NPPA-AS1	ENSG00000242349	down	DUX4 like vs. other subtypes	James et al. 2019
CTB-26E19.1	ENSG00000245688	down	DUX4 like vs. other subtypes	James et al. 2019
RP11-1259L22.1	ENSG00000253698	down	DUX4 like vs. other subtypes	James et al. 2019
LINC00299	ENSG00000236790	down	DUX4 like vs. other subtypes	James et al. 2019
RP11-269F21.1	ENSG00000250855	down	DUX4 like vs. other subtypes	James et al. 2019
RP11-403A21.2	ENSG00000264745	down	DUX4 like vs. other subtypes	James et al. 2019
LINC00114	ENSG00000223806	down	DUX4 like vs. other subtypes	James et al. 2019
RP11-211G3.2	ENSG00000223401	down	DUX4 like vs. other subtypes	James et al. 2019
CTD-2281E23.2	ENSG00000254269	down	DUX4 like vs. other subtypes	James et al. 2019
AC093609.1	ENSG00000230587	down	DUX4 like vs. other subtypes	James et al. 2019
CTC-506B8.1	ENSG00000249180	down	DUX4 like vs. other subtypes	James et al. 2019
CTB-118N6.3	ENSG00000248445	down	DUX4 like vs. other subtypes	James et al. 2019
RP11-53B2.4	ENSG00000267503	down	DUX4 like vs. other subtypes	James et al. 2019
PSMD5-AS1	ENSG00000226752	down	DUX4 like vs. other subtypes	James et al. 2019
RP11-379C10.4	ENSG00000230536	down	DUX4 like vs. other subtypes	James et al. 2019
LYST-AS1	ENSG00000229463	down	DUX4 like vs. other subtypes	James et al. 2019
RP11-174G6.1	ENSG00000214772	down	DUX4 like vs. other subtypes	James et al. 2019
RP11-26E5.1	ENSG00000253926	down	DUX4 like vs. other subtypes	James et al. 2019
AP000253.1	ENSG00000234509	down	DUX4 like vs. other subtypes	James et al. 2019
AC109826.1	ENSG00000226791	down	DUX4 like vs. other subtypes	James et al. 2019
RP11-53B2.5	ENSG00000267366	down	DUX4 like vs. other subtypes	James et al. 2019
RP11-161I2.1	ENSG00000187229	down	DUX4 like vs. other subtypes	James et al. 2019
RP11-403A21.3	ENSG00000265204	down	DUX4 like vs. other subtypes	James et al. 2019
AC007255.8	ENSG00000223813	down	DUX4 like vs. other subtypes	James et al. 2019
CTD-3064H18.1	ENSG00000266916	down	DUX4 like vs. other subtypes	James et al. 2019
LEF1-AS1	ENSG00000232021	down	DUX4 like vs. other subtypes	James et al. 2019
AC011747.4	ENSG00000236008	down	DUX4 like vs. other subtypes	James et al. 2019
RP3-477O4.14	ENSG00000230155	down	DUX4 like vs. other subtypes	James et al. 2019
RP11-68I3.5	ENSG00000263370	down	DUX4 like vs. other subtypes	James et al. 2019
AC006369.2	ENSG00000236213	down	DUX4 like vs. other subtypes	James et al. 2019
RP11-403I13.4	ENSG00000223779	down	DUX4 like vs. other subtypes	James et al. 2019
RP11-439E19.1	ENSG00000225300	down	DUX4 like vs. other subtypes	James et al. 2019
LINC00623	ENSG00000235398	down	DUX4 like vs. other subtypes	James et al. 2019
AC007879.7	ENSG00000229647	down	DUX4 like vs. other subtypes	James et al. 2019
XX-C283C717.1	ENSG00000227484	down	DUX4 like vs. other subtypes	James et al. 2019
AC021188.4	ENSG00000230747	down	DUX4 like vs. other subtypes	James et al. 2019
AC016735.2	ENSG00000231826	down	DUX4 like vs. other subtypes	James et al. 2019
LINC00677	ENSG00000259717	down	DUX4 like vs. other subtypes	James et al. 2019
AC004593.3	ENSG00000235669	down	DUX4 like vs. other subtypes	James et al. 2019
RP5-1028K7.2	ENSG00000266088	down	DUX4 like vs. other subtypes	James et al. 2019
CTD-2358C21.4	ENSG00000261731	down	DUX4 like vs. other subtypes	James et al. 2019
RP11-446N19.1	ENSG00000272369	down	DUX4 like vs. other subtypes	James et al. 2019
RP11-585P4.5	ENSG00000257497	down	DUX4 like vs. other subtypes	James et al. 2019
ZNF571-AS1	ENSG00000267470	down	DUX4 like vs. other subtypes	James et al. 2019
RP11-160E2.21	ENSG00000266664	down	DUX4 like vs. other subtypes	James et al. 2019
RP11-53B2.1	ENSG00000267529	down	DUX4 like vs. other subtypes	James et al. 2019
RP3-510H16.3	ENSG00000273176	down	DUX4 like vs. other subtypes	James et al. 2019
ANKRD44-IT1	ENSG00000236977	down	DUX4 like vs. other subtypes	James et al. 2019
RP11-269F21.2	ENSG00000248432	down	DUX4 like vs. other subtypes	James et al. 2019
RP11-20B24.7	ENSG00000264304	down	DUX4 like vs. other subtypes	James et al. 2019
RP11-713N11.5	ENSG00000258879	down	DUX4 like vs. other subtypes	James et al. 2019
RP11-473E2.3	ENSG00000227150	down	DUX4 like vs. other subtypes	James et al. 2019
RP11-216B9.6	ENSG00000228395	down	DUX4 like vs. other subtypes	James et al. 2019
AC138035.2	ENSG00000238035	down	DUX4 like vs. other subtypes	James et al. 2019
RP11-1036E20.9	ENSG00000214797	down	DUX4 like vs. other subtypes	James et al. 2019
RP11-54O7.1	ENSG00000230699	down	DUX4 like vs. other subtypes	James et al. 2019
RP11-540O11.1	ENSG00000251161	down	DUX4 like vs. other subtypes	James et al. 2019
PSMD6-AS2	ENSG00000239653	down	DUX4 like vs. other subtypes	James et al. 2019
RP11-367G6.3	ENSG00000272053	down	DUX4 like vs. other subtypes	James et al. 2019
RP11-517O13.3	ENSG00000258658	down	DUX4 like vs. other subtypes	James et al. 2019
RP11-521D12.5	ENSG00000243491	down	DUX4 like vs. other subtypes	James et al. 2019
RP11-59D5__B.2	ENSG00000236345	down	DUX4 like vs. other subtypes	James et al. 2019
AC016735.1	ENSG00000224739	down	DUX4 like vs. other subtypes	James et al. 2019
AC102953.6	ENSG00000231927	down	DUX4 like vs. other subtypes	James et al. 2019
KB-1460A1.1	ENSG00000253395	down	DUX4 like vs. other subtypes	James et al. 2019
CTD-2313F11.1	ENSG00000240535	down	DUX4 like vs. other subtypes	James et al. 2019
RP11-713N11.4	ENSG00000258449	down	DUX4 like vs. other subtypes	James et al. 2019
RP11-400L8.2	ENSG00000239300	down	DUX4 like vs. other subtypes	James et al. 2019
RP11-809O17.1	ENSG00000253210	down	DUX4 like vs. other subtypes	James et al. 2019
RP11-17G12.2	ENSG00000256897	down	DUX4 like vs. other subtypes	James et al. 2019
CTD-2201I18.1	ENSG00000249825	down	DUX4 like vs. other subtypes	James et al. 2019
OR2A1-AS1	ENSG00000244479	down	DUX4 like vs. other subtypes	James et al. 2019
RP11-563J2.2	ENSG00000215244	down	DUX4 like vs. other subtypes	James et al. 2019
RP11-473M20.9	ENSG00000262370	down	DUX4 like vs. other subtypes	James et al. 2019
RP11-206L10.2	ENSG00000228327	down	DUX4 like vs. other subtypes	James et al. 2019
RP11-38L15.3	ENSG00000231187	down	DUX4 like vs. other subtypes	James et al. 2019
RP11-148B3.1	ENSG00000258018	down	DUX4 like vs. other subtypes	James et al. 2019
AC018462.2	ENSG00000229839	down	DUX4 like vs. other subtypes	James et al. 2019
RP11-229P13.19	ENSG00000238268	down	DUX4 like vs. other subtypes	James et al. 2019
RP11-473E2.2	ENSG00000223795	down	DUX4 like vs. other subtypes	James et al. 2019
CTD-2616J11.10	ENSG00000268520	down	DUX4 like vs. other subtypes	James et al. 2019
LINC00880	ENSG00000243629	down	DUX4 like vs. other subtypes	James et al. 2019
RP11-134G8.7	ENSG00000224536	down	DUX4 like vs. other subtypes	James et al. 2019
MIR155HG	ENSG00000234883	down	DUX4 like vs. other subtypes	James et al. 2019
PRR7-AS1	ENSG00000246334	down	DUX4 like vs. other subtypes	James et al. 2019
ACTA2-AS1	ENSG00000180139	down	DUX4 like vs. other subtypes	James et al. 2019
LINC00996	ENSG00000242258	down	DUX4 like vs. other subtypes	James et al. 2019
RP11-353N4.5	ENSG00000234232	down	DUX4 like vs. other subtypes	James et al. 2019
IGBP1-AS1	ENSG00000203588	down	DUX4 like vs. other subtypes	James et al. 2019
RP11-403I13.9	ENSG00000233430	down	DUX4 like vs. other subtypes	James et al. 2019
RP3-510O8.4	ENSG00000232909	down	DUX4 like vs. other subtypes	James et al. 2019
RP5-1029K10.2	ENSG00000249906	down	DUX4 like vs. other subtypes	James et al. 2019
RP11-403P17.2	ENSG00000260650	down	DUX4 like vs. other subtypes	James et al. 2019
RP11-326C3.7	ENSG00000254910	down	DUX4 like vs. other subtypes	James et al. 2019
AC104984.4	ENSG00000265289	down	DUX4 like vs. other subtypes	James et al. 2019
HLCS-IT1	ENSG00000237646	down	DUX4 like vs. other subtypes	James et al. 2019
ERICH1-AS1	ENSG00000237647	down	DUX4 like vs. other subtypes	James et al. 2019
AC008697.1	ENSG00000249738	down	DUX4 like vs. other subtypes	James et al. 2019
LINC00444	ENSG00000234689	down	DUX4 like vs. other subtypes	James et al. 2019
RP11-96D1.7	ENSG00000260441	down	DUX4 like vs. other subtypes	James et al. 2019
CTC-458I2.2	ENSG00000251675	down	DUX4 like vs. other subtypes	James et al. 2019
RP11-361F15.2	ENSG00000225135	down	DUX4 like vs. other subtypes	James et al. 2019
LINC00032	ENSG00000231459	down	DUX4 like vs. other subtypes	James et al. 2019
SBF2-AS1	ENSG00000246273	down	DUX4 like vs. other subtypes	James et al. 2019
AC093673.5	ENSG00000232533	down	DUX4 like vs. other subtypes	James et al. 2019
AC123768.4	ENSG00000262728	down	DUX4 like vs. other subtypes	James et al. 2019
RP11-16E12.2	ENSG00000259772	down	DUX4 like vs. other subtypes	James et al. 2019
RP11-231E4.2	ENSG00000259779	down	DUX4 like vs. other subtypes	James et al. 2019
RP11-69I8.3	ENSG00000227220	down	DUX4 like vs. other subtypes	James et al. 2019
CTD-2017C7.1	ENSG00000256705	down	DUX4 like vs. other subtypes	James et al. 2019
PCED1B-AS1	ENSG00000247774	down	DUX4 like vs. other subtypes	James et al. 2019
LINC00892	ENSG00000233093	down	DUX4 like vs. other subtypes	James et al. 2019
AC156455.1	ENSG00000256546	down	DUX4 like vs. other subtypes	James et al. 2019
B4GALT4-AS1	ENSG00000240254	down	DUX4 like vs. other subtypes	James et al. 2019
RP11-588L15.2	ENSG00000250893	down	DUX4 like vs. other subtypes	James et al. 2019
RP11-377G16.2	ENSG00000248719	down	DUX4 like vs. other subtypes	James et al. 2019
RP11-443B7.1	ENSG00000238005	down	DUX4 like vs. other subtypes	James et al. 2019
RP11-144G7.2	ENSG00000255467	down	DUX4 like vs. other subtypes	James et al. 2019
CHRM3-AS2	ENSG00000233355	down	DUX4 like vs. other subtypes	James et al. 2019
RP11-128B16.3	ENSG00000236894	down	DUX4 like vs. other subtypes	James et al. 2019
RP11-661A12.9	ENSG00000255050	down	DUX4 like vs. other subtypes	James et al. 2019
AC003075.4	ENSG00000237773	down	DUX4 like vs. other subtypes	James et al. 2019
AC069363.1	ENSG00000224298	down	DUX4 like vs. other subtypes	James et al. 2019
LINC00669	ENSG00000267374	down	DUX4 like vs. other subtypes	James et al. 2019
ASB16-AS1	ENSG00000267080	down	DUX4 like vs. other subtypes	James et al. 2019
RP6-206I17.1	ENSG00000223804	down	DUX4 like vs. other subtypes	James et al. 2019
AC007381.3	ENSG00000228590	down	DUX4 like vs. other subtypes	James et al. 2019
LINC00582	ENSG00000229228	down	DUX4 like vs. other subtypes	James et al. 2019
RP11-809C9.2	ENSG00000258102	down	DUX4 like vs. other subtypes	James et al. 2019
ZNF883	ENSG00000228623	down	DUX4 like vs. other subtypes	James et al. 2019
RP11-542M13.3	ENSG00000268804	down	DUX4 like vs. other subtypes	James et al. 2019
LINC00202-2	ENSG00000231976	down	DUX4 like vs. other subtypes	James et al. 2019
RP11-403A21.1	ENSG00000265752	down	DUX4 like vs. other subtypes	James et al. 2019
XXbac-BPG299F13.14	ENSG00000271821	down	DUX4 like vs. other subtypes	James et al. 2019
LINC00426	ENSG00000238121	down	DUX4 like vs. other subtypes	James et al. 2019
AC007381.2	ENSG00000223929	down	DUX4 like vs. other subtypes	James et al. 2019
RP3-460G2.2	ENSG00000234147	down	DUX4 like vs. other subtypes	James et al. 2019
LA16c-390H2.4	ENSG00000262312	down	DUX4 like vs. other subtypes	James et al. 2019
C1RL-AS1	ENSG00000205885	down	DUX4 like vs. other subtypes	James et al. 2019
ACTN1-AS1	ENSG00000259062	down	DUX4 like vs. other subtypes	James et al. 2019
LINC00102	ENSG00000230542	down	DUX4 like vs. other subtypes	James et al. 2019
LL22NC03-86G7.1	ENSG00000224086	down	DUX4 like vs. other subtypes	James et al. 2019
RP11-59O6.3	ENSG00000235880	down	DUX4 like vs. other subtypes	James et al. 2019
RP1-67K17.4	ENSG00000237851	down	DUX4 like vs. other subtypes	James et al. 2019
RP11-468D11.1	ENSG00000248137	down	DUX4 like vs. other subtypes	James et al. 2019
RP11-277L2.3	ENSG00000233368	down	DUX4 like vs. other subtypes	James et al. 2019
LINC00415	ENSG00000231983	down	DUX4 like vs. other subtypes	James et al. 2019
AC009495.2	ENSG00000235192	down	DUX4 like vs. other subtypes	James et al. 2019
RP11-1149O23.2	ENSG00000253930	down	DUX4 like vs. other subtypes	James et al. 2019
RP4-669H2.1	ENSG00000231703	down	DUX4 like vs. other subtypes	James et al. 2019
RP11-640M9.1	ENSG00000236943	down	DUX4 like vs. other subtypes	James et al. 2019
LINC01146	ENSG00000258867	down	DUX4 like vs. other subtypes	James et al. 2019
LINC00264	ENSG00000233261	down	DUX4 like vs. other subtypes	James et al. 2019
RP11-797A18.3	ENSG00000259652	down	DUX4 like vs. other subtypes	James et al. 2019
CTD-3060P21.1	ENSG00000262884	down	DUX4 like vs. other subtypes	James et al. 2019
RP4-728D4.2	ENSG00000239636	down	DUX4 like vs. other subtypes	James et al. 2019
IQCJ-SCHIP1-AS1	ENSG00000241211	down	DUX4 like vs. other subtypes	James et al. 2019
RP4-545C24.1	ENSG00000244198	down	DUX4 like vs. other subtypes	James et al. 2019
KBTBD11-OT1	ENSG00000253696	down	DUX4 like vs. other subtypes	James et al. 2019
CTB-113P19.1	ENSG00000249035	down	DUX4 like vs. other subtypes	James et al. 2019
RP11-478K7.2	ENSG00000226159	down	DUX4 like vs. other subtypes	James et al. 2019
AC079630.4	ENSG00000225342	down	DUX4 like vs. other subtypes	James et al. 2019
LINC01071	ENSG00000237361	down	DUX4 like vs. other subtypes	James et al. 2019
RP11-353N4.1	ENSG00000229801	down	DUX4 like vs. other subtypes	James et al. 2019
AC073130.3	ENSG00000243243	down	DUX4 like vs. other subtypes	James et al. 2019
RP11-405F3.5	ENSG00000261633	down	DUX4 like vs. other subtypes	James et al. 2019
RP11-346D6.6	ENSG00000231131	down	DUX4 like vs. other subtypes	James et al. 2019
RP11-950C14.7	ENSG00000259138	down	DUX4 like vs. other subtypes	James et al. 2019
AC104820.2	ENSG00000234663	down	DUX4 like vs. other subtypes	James et al. 2019
RP13-297E16.4	ENSG00000223511	down	DUX4 like vs. other subtypes	James et al. 2019
RP11-269F21.3	ENSG00000249815	down	DUX4 like vs. other subtypes	James et al. 2019
LA16c-380H5.2	ENSG00000262362	down	DUX4 like vs. other subtypes	James et al. 2019
RP11-473M20.11	ENSG00000263011	down	DUX4 like vs. other subtypes	James et al. 2019
RP11-802E16.3	ENSG00000255031	down	DUX4 like vs. other subtypes	James et al. 2019
AC006042.7	ENSG00000233108	down	DUX4 like vs. other subtypes	James et al. 2019
AC007879.5	ENSG00000223725	down	DUX4 like vs. other subtypes	James et al. 2019
LINC00494	ENSG00000235621	down	DUX4 like vs. other subtypes	James et al. 2019
AC007880.1	ENSG00000234572	down	DUX4 like vs. other subtypes	James et al. 2019
RP11-478C19.2	ENSG00000258210	down	DUX4 like vs. other subtypes	James et al. 2019
AC017074.2	ENSG00000227359	down	DUX4 like vs. other subtypes	James et al. 2019
RP11-732A19.8	ENSG00000254400	down	DUX4 like vs. other subtypes	James et al. 2019
AC069257.8	ENSG00000228028	down	DUX4 like vs. other subtypes	James et al. 2019
RP11-329J18.3	ENSG00000260744	down	DUX4 like vs. other subtypes	James et al. 2019
RP11-1000B6.3	ENSG00000261064	down	DUX4 like vs. other subtypes	James et al. 2019
CACNA1C-AS1	ENSG00000246627	down	DUX4 like vs. other subtypes	James et al. 2019
AC007952.4	ENSG00000266311	down	DUX4 like vs. other subtypes	James et al. 2019
AC026150.8	ENSG00000260693	down	DUX4 like vs. other subtypes	James et al. 2019
RP4-583P15.10	ENSG00000229299	down	DUX4 like vs. other subtypes	James et al. 2019
RP11-667M19.10	ENSG00000256452	down	DUX4 like vs. other subtypes	James et al. 2019
RP11-439C15.4	ENSG00000253764	down	DUX4 like vs. other subtypes	James et al. 2019
RP11-426C22.6	ENSG00000260953	down	DUX4 like vs. other subtypes	James et al. 2019
CTB-31O20.4	ENSG00000267244	up	BCR-ABL like vs. other subtypes	James et al. 2019
RP11-1094M14.5	ENSG00000267074	up	BCR-ABL like vs. other subtypes	James et al. 2019
CTB-26E19.1	ENSG00000245688	up	BCR-ABL like vs. other subtypes	James et al. 2019
RP11-536K7.5	ENSG00000229664	up	BCR-ABL like vs. other subtypes	James et al. 2019
LINC00114	ENSG00000223806	up	BCR-ABL like vs. other subtypes	James et al. 2019
RP11-1023P17.2	ENSG00000253924	up	BCR-ABL like vs. other subtypes	James et al. 2019
RP11-18H21.1	ENSG00000245954	up	BCR-ABL like vs. other subtypes	James et al. 2019
AC004593.3	ENSG00000235669	up	BCR-ABL like vs. other subtypes	James et al. 2019
CCDC26	ENSG00000229140	up	BCR-ABL like vs. other subtypes	James et al. 2019
LINC00958	ENSG00000251381	up	BCR-ABL like vs. other subtypes	James et al. 2019
LINC01071	ENSG00000237361	up	BCR-ABL like vs. other subtypes	James et al. 2019
RP11-234B24.4	ENSG00000256988	up	BCR-ABL like vs. other subtypes	James et al. 2019
RP11-1259L22.1	ENSG00000253698	up	BCR-ABL like vs. other subtypes	James et al. 2019
RP11-497G19.2	ENSG00000257654	up	BCR-ABL like vs. other subtypes	James et al. 2019
RP11-497G19.1	ENSG00000257883	up	BCR-ABL like vs. other subtypes	James et al. 2019
RP11-526N18.1	ENSG00000258416	up	BCR-ABL like vs. other subtypes	James et al. 2019
RP11-809O17.1	ENSG00000253210	up	BCR-ABL like vs. other subtypes	James et al. 2019
LINC00880	ENSG00000243629	up	BCR-ABL like vs. other subtypes	James et al. 2019
RP11-332E19.2	ENSG00000258723	up	BCR-ABL like vs. other subtypes	James et al. 2019
RP11-347C18.3	ENSG00000253878	up	BCR-ABL like vs. other subtypes	James et al. 2019
ERICH1-AS1	ENSG00000237647	up	BCR-ABL like vs. other subtypes	James et al. 2019
RP11-377G16.2	ENSG00000248719	up	BCR-ABL like vs. other subtypes	James et al. 2019
RP11-293M10.6	ENSG00000259319	up	BCR-ABL like vs. other subtypes	James et al. 2019
WDR86-AS1	ENSG00000243836	up	BCR-ABL like vs. other subtypes	James et al. 2019
RP11-318M2.2	ENSG00000247081	up	BCR-ABL like vs. other subtypes	James et al. 2019
RP1-223B1.1	ENSG00000228793	up	BCR-ABL like vs. other subtypes	James et al. 2019
LINC00996	ENSG00000242258	up	BCR-ABL like vs. other subtypes	James et al. 2019
RP11-800A3.7	ENSG00000257038	up	BCR-ABL like vs. other subtypes	James et al. 2019
RP11-456O19.4	ENSG00000267712	up	BCR-ABL like vs. other subtypes	James et al. 2019
CTD-2008L17.2	ENSG00000206129	up	BCR-ABL like vs. other subtypes	James et al. 2019
RP11-20D14.3	ENSG00000255829	up	BCR-ABL like vs. other subtypes	James et al. 2019
RP11-588L15.2	ENSG00000250893	up	BCR-ABL like vs. other subtypes	James et al. 2019
MME-AS1	ENSG00000240666	up	BCR-ABL like vs. other subtypes	James et al. 2019
RP11-26E5.1	ENSG00000253926	up	BCR-ABL like vs. other subtypes	James et al. 2019
RP11-269F21.3	ENSG00000249815	up	BCR-ABL like vs. other subtypes	James et al. 2019
RP11-54O7.1	ENSG00000230699	up	BCR-ABL like vs. other subtypes	James et al. 2019
RP11-405F3.5	ENSG00000261633	up	BCR-ABL like vs. other subtypes	James et al. 2019
CTB-118N6.3	ENSG00000248445	up	BCR-ABL like vs. other subtypes	James et al. 2019
RP1-111D6.3	ENSG00000228408	up	BCR-ABL like vs. other subtypes	James et al. 2019
LINC00960	ENSG00000242516	up	BCR-ABL like vs. other subtypes	James et al. 2019
CTD-2509G16.5	ENSG00000258760	up	BCR-ABL like vs. other subtypes	James et al. 2019
GAS6-AS1	ENSG00000233695	up	BCR-ABL like vs. other subtypes	James et al. 2019
RP11-75C9.1	ENSG00000225706	up	BCR-ABL like vs. other subtypes	James et al. 2019
RP11-473M20.9	ENSG00000262370	up	BCR-ABL like vs. other subtypes	James et al. 2019
RP11-114M1.1	ENSG00000228561	up	BCR-ABL like vs. other subtypes	James et al. 2019
AF131215.9	ENSG00000269918	up	BCR-ABL like vs. other subtypes	James et al. 2019
AC007463.2	ENSG00000226506	up	BCR-ABL like vs. other subtypes	James et al. 2019
AC093326.1	ENSG00000223985	up	BCR-ABL like vs. other subtypes	James et al. 2019
KBTBD11-OT1	ENSG00000253696	up	BCR-ABL like vs. other subtypes	James et al. 2019
CTD-2313F11.1	ENSG00000240535	up	BCR-ABL like vs. other subtypes	James et al. 2019
AC005780.1	ENSG00000267320	up	BCR-ABL like vs. other subtypes	James et al. 2019
AC020571.3	ENSG00000229056	up	BCR-ABL like vs. other subtypes	James et al. 2019
RP11-231E6.1	ENSG00000243081	up	BCR-ABL like vs. other subtypes	James et al. 2019
SNAP47-AS1	ENSG00000230005	up	BCR-ABL like vs. other subtypes	James et al. 2019
KB-1460A1.1	ENSG00000253395	up	BCR-ABL like vs. other subtypes	James et al. 2019
RP1-168L15.5	ENSG00000261420	up	BCR-ABL like vs. other subtypes	James et al. 2019
AC061992.2	ENSG00000267737	up	BCR-ABL like vs. other subtypes	James et al. 2019
RP4-794H19.4	ENSG00000230812	up	BCR-ABL like vs. other subtypes	James et al. 2019
LINC00426	ENSG00000238121	up	BCR-ABL like vs. other subtypes	James et al. 2019
AC002454.1	ENSG00000237819	up	BCR-ABL like vs. other subtypes	James et al. 2019
RP11-211G3.2	ENSG00000223401	up	BCR-ABL like vs. other subtypes	James et al. 2019
SPON1	ENSG00000152268	up	BCR-ABL like vs. other subtypes	James et al. 2019
RP11-403N16.2	ENSG00000232494	up	BCR-ABL like vs. other subtypes	James et al. 2019
RP11-69I8.3	ENSG00000227220	up	BCR-ABL like vs. other subtypes	James et al. 2019
RP11-387D10.3	ENSG00000245479	up	BCR-ABL like vs. other subtypes	James et al. 2019
LINC00869	ENSG00000226067	up	BCR-ABL like vs. other subtypes	James et al. 2019
MIAT	ENSG00000225783	up	BCR-ABL like vs. other subtypes	James et al. 2019
CTD-3064M3.7	ENSG00000271959	up	BCR-ABL like vs. other subtypes	James et al. 2019
LINC00977	ENSG00000250400	up	BCR-ABL like vs. other subtypes	James et al. 2019
RP13-395E19.3	ENSG00000215304	up	BCR-ABL like vs. other subtypes	James et al. 2019
RP11-420G6.4	ENSG00000230438	up	BCR-ABL like vs. other subtypes	James et al. 2019
RP11-691H4.4	ENSG00000267694	up	BCR-ABL like vs. other subtypes	James et al. 2019
RP11-588P7.2	ENSG00000258662	up	BCR-ABL like vs. other subtypes	James et al. 2019
RP11-666A8.7	ENSG00000267543	up	BCR-ABL like vs. other subtypes	James et al. 2019
RP4-758J18.10	ENSG00000225285	up	BCR-ABL like vs. other subtypes	James et al. 2019
RP11-468D11.1	ENSG00000248137	up	BCR-ABL like vs. other subtypes	James et al. 2019
NAV2-AS2	ENSG00000254453	up	BCR-ABL like vs. other subtypes	James et al. 2019
RP3-425P12.5	ENSG00000229313	up	BCR-ABL like vs. other subtypes	James et al. 2019
AC099684.1	ENSG00000228133	up	BCR-ABL like vs. other subtypes	James et al. 2019
RNF157-AS1	ENSG00000267128	up	BCR-ABL like vs. other subtypes	James et al. 2019
RP1-63G5.5	ENSG00000243902	up	BCR-ABL like vs. other subtypes	James et al. 2019
RP11-269F21.2	ENSG00000248432	up	BCR-ABL like vs. other subtypes	James et al. 2019
RP11-403I13.8	ENSG00000235999	up	BCR-ABL like vs. other subtypes	James et al. 2019
ZEB1-AS1	ENSG00000237036	up	BCR-ABL like vs. other subtypes	James et al. 2019
AC092614.2	ENSG00000227542	up	BCR-ABL like vs. other subtypes	James et al. 2019
AC007036.6	ENSG00000227017	up	BCR-ABL like vs. other subtypes	James et al. 2019
IFNG-AS1	ENSG00000255733	up	BCR-ABL like vs. other subtypes	James et al. 2019
RP11-53B2.5	ENSG00000267366	up	BCR-ABL like vs. other subtypes	James et al. 2019
RP11-316P17.2	ENSG00000237372	up	BCR-ABL like vs. other subtypes	James et al. 2019
RP11-439C15.4	ENSG00000253764	up	BCR-ABL like vs. other subtypes	James et al. 2019
AC109826.1	ENSG00000226791	up	BCR-ABL like vs. other subtypes	James et al. 2019
CTB-70G10.1	ENSG00000266928	up	BCR-ABL like vs. other subtypes	James et al. 2019
AC018890.6	ENSG00000236449	up	BCR-ABL like vs. other subtypes	James et al. 2019
RP1-249F5.3	ENSG00000236823	up	BCR-ABL like vs. other subtypes	James et al. 2019
RP11-94C24.8	ENSG00000250286	up	BCR-ABL like vs. other subtypes	James et al. 2019
RP11-887P2.6	ENSG00000258303	up	BCR-ABL like vs. other subtypes	James et al. 2019
RP5-884M6.1	ENSG00000228742	up	BCR-ABL like vs. other subtypes	James et al. 2019
RP11-337N6.1	ENSG00000271996	up	BCR-ABL like vs. other subtypes	James et al. 2019
RP11-228B15.4	ENSG00000225032	up	BCR-ABL like vs. other subtypes	James et al. 2019
CTB-55O6.4	ENSG00000267670	up	BCR-ABL like vs. other subtypes	James et al. 2019
GAS6-AS2	ENSG00000272695	up	BCR-ABL like vs. other subtypes	James et al. 2019
RP11-326C3.7	ENSG00000254910	up	BCR-ABL like vs. other subtypes	James et al. 2019
RP11-168K11.2	ENSG00000237073	up	BCR-ABL like vs. other subtypes	James et al. 2019
RP3-523C21.2	ENSG00000236166	up	BCR-ABL like vs. other subtypes	James et al. 2019
AC016735.1	ENSG00000224739	up	BCR-ABL like vs. other subtypes	James et al. 2019
HHIP-AS1	ENSG00000248890	up	BCR-ABL like vs. other subtypes	James et al. 2019
RP11-89F3.2	ENSG00000236140	up	BCR-ABL like vs. other subtypes	James et al. 2019
RP11-403A21.3	ENSG00000265204	up	BCR-ABL like vs. other subtypes	James et al. 2019
CTD-2281E23.2	ENSG00000254269	up	BCR-ABL like vs. other subtypes	James et al. 2019
AC096559.1	ENSG00000224184	up	BCR-ABL like vs. other subtypes	James et al. 2019
ACTN1-AS1	ENSG00000259062	up	BCR-ABL like vs. other subtypes	James et al. 2019
RP11-353N4.4	ENSG00000223759	up	BCR-ABL like vs. other subtypes	James et al. 2019
AC092580.4	ENSG00000235576	up	BCR-ABL like vs. other subtypes	James et al. 2019
CTA-292E10.6	ENSG00000226471	up	BCR-ABL like vs. other subtypes	James et al. 2019
AC068610.3	ENSG00000225535	up	BCR-ABL like vs. other subtypes	James et al. 2019
CTD-2561B21.10	ENSG00000262098	up	BCR-ABL like vs. other subtypes	James et al. 2019
LINC00102	ENSG00000230542	up	BCR-ABL like vs. other subtypes	James et al. 2019
RP11-53B2.1	ENSG00000267529	up	BCR-ABL like vs. other subtypes	James et al. 2019
RP11-148B3.1	ENSG00000258018	up	BCR-ABL like vs. other subtypes	James et al. 2019
LINC00427	ENSG00000236463	up	BCR-ABL like vs. other subtypes	James et al. 2019
RP11-298E2.2	ENSG00000237734	up	BCR-ABL like vs. other subtypes	James et al. 2019
RP11-753H16.3	ENSG00000258137	up	BCR-ABL like vs. other subtypes	James et al. 2019
RP11-353N4.5	ENSG00000234232	up	BCR-ABL like vs. other subtypes	James et al. 2019
AF064858.8	ENSG00000235888	up	BCR-ABL like vs. other subtypes	James et al. 2019
RP1-16A9.1	ENSG00000253983	up	BCR-ABL like vs. other subtypes	James et al. 2019
SLC8A1-AS1	ENSG00000227028	up	BCR-ABL like vs. other subtypes	James et al. 2019
CTC-506B8.1	ENSG00000249180	up	BCR-ABL like vs. other subtypes	James et al. 2019
RP11-553A21.3	ENSG00000231652	up	BCR-ABL like vs. other subtypes	James et al. 2019
LINC00578	ENSG00000228221	up	BCR-ABL like vs. other subtypes	James et al. 2019
RP11-542B15.1	ENSG00000203585	up	BCR-ABL like vs. other subtypes	James et al. 2019
RP11-809C9.2	ENSG00000258102	up	BCR-ABL like vs. other subtypes	James et al. 2019
EGOT	ENSG00000235947	up	BCR-ABL like vs. other subtypes	James et al. 2019
RP11-326C3.2	ENSG00000255026	up	BCR-ABL like vs. other subtypes	James et al. 2019
IGFBP7-AS1	ENSG00000245067	up	BCR-ABL like vs. other subtypes	James et al. 2019
RP11-449D8.1	ENSG00000265485	up	BCR-ABL like vs. other subtypes	James et al. 2019
RP11-1293J14.1	ENSG00000271868	up	BCR-ABL like vs. other subtypes	James et al. 2019
RP11-498M5.2	ENSG00000251309	up	BCR-ABL like vs. other subtypes	James et al. 2019
RP11-53B2.3	ENSG00000267136	up	BCR-ABL like vs. other subtypes	James et al. 2019
RP11-229P13.20	ENSG00000235117	up	BCR-ABL like vs. other subtypes	James et al. 2019
RP11-579D7.4	ENSG00000257660	up	BCR-ABL like vs. other subtypes	James et al. 2019
AC021188.4	ENSG00000230747	up	BCR-ABL like vs. other subtypes	James et al. 2019
RP11-867G23.13	ENSG00000254458	up	BCR-ABL like vs. other subtypes	James et al. 2019
RP11-367G6.3	ENSG00000272053	up	BCR-ABL like vs. other subtypes	James et al. 2019
RP11-277L2.3	ENSG00000233368	up	BCR-ABL like vs. other subtypes	James et al. 2019
CTB-79E8.2	ENSG00000253445	up	BCR-ABL like vs. other subtypes	James et al. 2019
LINC00984	ENSG00000259330	up	BCR-ABL like vs. other subtypes	James et al. 2019
RP11-461F16.3	ENSG00000257910	up	BCR-ABL like vs. other subtypes	James et al. 2019
RP11-661A12.12	ENSG00000254812	up	BCR-ABL like vs. other subtypes	James et al. 2019
AC010746.3	ENSG00000225979	up	BCR-ABL like vs. other subtypes	James et al. 2019
RP13-735L24.1	ENSG00000260423	up	BCR-ABL like vs. other subtypes	James et al. 2019
RP11-799B12.2	ENSG00000264924	up	BCR-ABL like vs. other subtypes	James et al. 2019
AC074286.1	ENSG00000213963	up	BCR-ABL like vs. other subtypes	James et al. 2019
RP11-461L13.2	ENSG00000270751	up	BCR-ABL like vs. other subtypes	James et al. 2019
AC017116.11	ENSG00000239775	up	BCR-ABL like vs. other subtypes	James et al. 2019
AC006129.2	ENSG00000268027	up	BCR-ABL like vs. other subtypes	James et al. 2019
RP11-473M20.11	ENSG00000263011	up	BCR-ABL like vs. other subtypes	James et al. 2019
AC093609.1	ENSG00000230587	up	BCR-ABL like vs. other subtypes	James et al. 2019
LINC00623	ENSG00000235398	up	BCR-ABL like vs. other subtypes	James et al. 2019
RP1-67K17.4	ENSG00000237851	up	BCR-ABL like vs. other subtypes	James et al. 2019
RP1-159A19.4	ENSG00000237429	up	BCR-ABL like vs. other subtypes	James et al. 2019
LINC01154	ENSG00000257477	up	BCR-ABL like vs. other subtypes	James et al. 2019
RP11-617D20.1	ENSG00000231160	up	BCR-ABL like vs. other subtypes	James et al. 2019
RP11-514F3.5	ENSG00000255186	up	BCR-ABL like vs. other subtypes	James et al. 2019
RP11-47J17.2	ENSG00000203258	up	BCR-ABL like vs. other subtypes	James et al. 2019
AC007036.4	ENSG00000230751	up	BCR-ABL like vs. other subtypes	James et al. 2019
AC024084.1	ENSG00000230649	up	BCR-ABL like vs. other subtypes	James et al. 2019
RP11-678G14.2	ENSG00000268081	up	BCR-ABL like vs. other subtypes	James et al. 2019
AP000253.1	ENSG00000234509	up	BCR-ABL like vs. other subtypes	James et al. 2019
RP11-446N19.1	ENSG00000272369	up	BCR-ABL like vs. other subtypes	James et al. 2019
RP11-53B2.4	ENSG00000267503	up	BCR-ABL like vs. other subtypes	James et al. 2019
SOCS2-AS1	ENSG00000246985	up	BCR-ABL like vs. other subtypes	James et al. 2019
LA16c-390H2.4	ENSG00000262312	up	BCR-ABL like vs. other subtypes	James et al. 2019
RP11-207C16.4	ENSG00000225408	up	BCR-ABL like vs. other subtypes	James et al. 2019
RP11-333E1.2	ENSG00000263164	up	BCR-ABL like vs. other subtypes	James et al. 2019
RP6-206I17.1	ENSG00000223804	up	BCR-ABL like vs. other subtypes	James et al. 2019
AC012309.5	ENSG00000226686	up	BCR-ABL like vs. other subtypes	James et al. 2019
AC009784.3	ENSG00000232053	up	BCR-ABL like vs. other subtypes	James et al. 2019
RP11-21L19.1	ENSG00000254418	up	BCR-ABL like vs. other subtypes	James et al. 2019
AC123768.4	ENSG00000262728	up	BCR-ABL like vs. other subtypes	James et al. 2019
RP11-232C2.1	ENSG00000258478	up	BCR-ABL like vs. other subtypes	James et al. 2019
TNRC6C-AS1	ENSG00000204282	up	BCR-ABL like vs. other subtypes	James et al. 2019
AC034228.4	ENSG00000234758	up	BCR-ABL like vs. other subtypes	James et al. 2019
RP11-520A21.1	ENSG00000233096	up	BCR-ABL like vs. other subtypes	James et al. 2019
RP11-640M9.1	ENSG00000236943	up	BCR-ABL like vs. other subtypes	James et al. 2019
RP5-823G15.5	ENSG00000259723	up	BCR-ABL like vs. other subtypes	James et al. 2019
RP11-54O15.3	ENSG00000224764	up	BCR-ABL like vs. other subtypes	James et al. 2019
RP4-728D4.2	ENSG00000239636	up	BCR-ABL like vs. other subtypes	James et al. 2019
RP11-63B13.1	ENSG00000261501	up	BCR-ABL like vs. other subtypes	James et al. 2019
EAF1-AS1	ENSG00000249786	up	BCR-ABL like vs. other subtypes	James et al. 2019
RP11-473M20.7	ENSG00000261971	up	BCR-ABL like vs. other subtypes	James et al. 2019
AC009970.1	ENSG00000233953	up	BCR-ABL like vs. other subtypes	James et al. 2019
RP11-242P2.1	ENSG00000258637	up	BCR-ABL like vs. other subtypes	James et al. 2019
RP11-439L18.1	ENSG00000232618	up	BCR-ABL like vs. other subtypes	James et al. 2019
RP11-47I22.1	ENSG00000258926	up	BCR-ABL like vs. other subtypes	James et al. 2019
RP11-563J2.2	ENSG00000215244	up	BCR-ABL like vs. other subtypes	James et al. 2019
MIR4435-1HG	ENSG00000172965	up	BCR-ABL like vs. other subtypes	James et al. 2019
AC007163.3	ENSG00000237166	up	BCR-ABL like vs. other subtypes	James et al. 2019
CTC-458I2.2	ENSG00000251675	up	BCR-ABL like vs. other subtypes	James et al. 2019
RP11-96H19.1	ENSG00000257261	up	BCR-ABL like vs. other subtypes	James et al. 2019
LINC00422	ENSG00000224429	up	BCR-ABL like vs. other subtypes	James et al. 2019
RP11-91P24.5	ENSG00000254691	up	BCR-ABL like vs. other subtypes	James et al. 2019
CTD-3184A7.4	ENSG00000232442	up	BCR-ABL like vs. other subtypes	James et al. 2019
LINC01138	ENSG00000215863	up	BCR-ABL like vs. other subtypes	James et al. 2019
CTD-3037G24.3	ENSG00000259899	up	BCR-ABL like vs. other subtypes	James et al. 2019
RP11-582J16.4	ENSG00000251034	up	BCR-ABL like vs. other subtypes	James et al. 2019
RP11-75C10.9	ENSG00000267016	up	BCR-ABL like vs. other subtypes	James et al. 2019
FLNB-AS1	ENSG00000244161	up	BCR-ABL like vs. other subtypes	James et al. 2019
RP11-191G24.1	ENSG00000227070	up	BCR-ABL like vs. other subtypes	James et al. 2019
RP11-46F15.2	ENSG00000238260	up	BCR-ABL like vs. other subtypes	James et al. 2019
RP11-358B23.5	ENSG00000267758	up	BCR-ABL like vs. other subtypes	James et al. 2019
CTB-39G8.3	ENSG00000267344	up	BCR-ABL like vs. other subtypes	James et al. 2019
RP11-326C3.11	ENSG00000251661	up	BCR-ABL like vs. other subtypes	James et al. 2019
RP11-439L18.2	ENSG00000224460	up	BCR-ABL like vs. other subtypes	James et al. 2019
RP11-753H16.5	ENSG00000258086	up	BCR-ABL like vs. other subtypes	James et al. 2019
RP11-103G8.2	ENSG00000240137	up	BCR-ABL like vs. other subtypes	James et al. 2019
RP1-197B17.3	ENSG00000257433	up	BCR-ABL like vs. other subtypes	James et al. 2019
RP11-403A21.2	ENSG00000264745	up	BCR-ABL like vs. other subtypes	James et al. 2019
RP11-1000B6.3	ENSG00000261064	up	BCR-ABL like vs. other subtypes	James et al. 2019
FAM85B	ENSG00000253893	up	BCR-ABL like vs. other subtypes	James et al. 2019
ASB16-AS1	ENSG00000267080	up	BCR-ABL like vs. other subtypes	James et al. 2019
C1RL-AS1	ENSG00000205885	up	BCR-ABL like vs. other subtypes	James et al. 2019
RP4-584D14.5	ENSG00000240449	up	BCR-ABL like vs. other subtypes	James et al. 2019
RP11-273B20.1	ENSG00000256967	up	BCR-ABL like vs. other subtypes	James et al. 2019
RP11-25K19.1	ENSG00000167912	up	BCR-ABL like vs. other subtypes	James et al. 2019
RP11-413E1.4	ENSG00000230735	up	BCR-ABL like vs. other subtypes	James et al. 2019
ANKRD44-IT1	ENSG00000236977	up	BCR-ABL like vs. other subtypes	James et al. 2019
RP11-285F7.2	ENSG00000242861	up	BCR-ABL like vs. other subtypes	James et al. 2019
PSMD5-AS1	ENSG00000226752	up	BCR-ABL like vs. other subtypes	James et al. 2019
RP11-37B2.1	ENSG00000251136	up	BCR-ABL like vs. other subtypes	James et al. 2019
RP11-439E19.1	ENSG00000225300	up	BCR-ABL like vs. other subtypes	James et al. 2019
AC026202.3	ENSG00000233912	up	BCR-ABL like vs. other subtypes	James et al. 2019
RP11-495P10.1	ENSG00000231551	up	BCR-ABL like vs. other subtypes	James et al. 2019
RP11-85F14.5	ENSG00000239213	up	BCR-ABL like vs. other subtypes	James et al. 2019
H1FX-AS1	ENSG00000206417	up	BCR-ABL like vs. other subtypes	James et al. 2019
AGBL5-IT1	ENSG00000229122	up	BCR-ABL like vs. other subtypes	James et al. 2019
RP11-197P3.5	ENSG00000229587	down	BCR-ABL like vs. other subtypes	James et al. 2019
AC073333.8	ENSG00000235837	down	BCR-ABL like vs. other subtypes	James et al. 2019
RP11-363E6.3	ENSG00000254027	down	BCR-ABL like vs. other subtypes	James et al. 2019
AP000487.5	ENSG00000246889	down	BCR-ABL like vs. other subtypes	James et al. 2019
RP4-676J13.2	ENSG00000228679	down	BCR-ABL like vs. other subtypes	James et al. 2019
RP11-262H14.4	ENSG00000170161	down	BCR-ABL like vs. other subtypes	James et al. 2019
GFOD1-AS1	ENSG00000237786	down	BCR-ABL like vs. other subtypes	James et al. 2019
CTD-2616J11.3	ENSG00000254760	down	BCR-ABL like vs. other subtypes	James et al. 2019
ZEB2-AS1	ENSG00000238057	down	BCR-ABL like vs. other subtypes	James et al. 2019
RP1-261D10.2	ENSG00000259146	down	BCR-ABL like vs. other subtypes	James et al. 2019
RP11-665G4.1	ENSG00000249252	down	BCR-ABL like vs. other subtypes	James et al. 2019
CTD-3032H12.1	ENSG00000259725	down	BCR-ABL like vs. other subtypes	James et al. 2019
CRNDE	ENSG00000245694	down	BCR-ABL like vs. other subtypes	James et al. 2019
UHRF1	ENSG00000034063	down	BCR-ABL like vs. other subtypes	James et al. 2019
CTA-833B7.2	ENSG00000183822	down	BCR-ABL like vs. other subtypes	James et al. 2019
LINC00238	ENSG00000196553	down	BCR-ABL like vs. other subtypes	James et al. 2019
CTB-33O18.3	ENSG00000253955	down	BCR-ABL like vs. other subtypes	James et al. 2019
RP1-50J22.4	ENSG00000224666	down	BCR-ABL like vs. other subtypes	James et al. 2019
RP11-436M15.3	ENSG00000258693	down	BCR-ABL like vs. other subtypes	James et al. 2019
AF038458.3	ENSG00000267786	down	BCR-ABL like vs. other subtypes	James et al. 2019
ATP11A-AS1	ENSG00000232684	down	BCR-ABL like vs. other subtypes	James et al. 2019
CTD-2523D13.2	ENSG00000254854	down	BCR-ABL like vs. other subtypes	James et al. 2019
RP11-123O10.4	ENSG00000256248	down	BCR-ABL like vs. other subtypes	James et al. 2019
RP11-187C18.2	ENSG00000232116	down	BCR-ABL like vs. other subtypes	James et al. 2019
SENCR	ENSG00000254703	down	BCR-ABL like vs. other subtypes	James et al. 2019
RP11-286H14.8	ENSG00000243230	down	BCR-ABL like vs. other subtypes	James et al. 2019
AP001469.5	ENSG00000223901	down	BCR-ABL like vs. other subtypes	James et al. 2019
RP11-21A7A.2	ENSG00000256824	down	BCR-ABL like vs. other subtypes	James et al. 2019
SMARCA5-AS1	ENSG00000245112	down	BCR-ABL like vs. other subtypes	James et al. 2019
PCDH9-AS3	ENSG00000225263	down	BCR-ABL like vs. other subtypes	James et al. 2019
AP000640.2	ENSG00000255355	down	BCR-ABL like vs. other subtypes	James et al. 2019
DLG5-AS1	ENSG00000233871	down	BCR-ABL like vs. other subtypes	James et al. 2019
COL5A1-AS1	ENSG00000204011	down	BCR-ABL like vs. other subtypes	James et al. 2019
MLK7-AS1	ENSG00000238133	down	BCR-ABL like vs. other subtypes	James et al. 2019
RP11-789C17.3	ENSG00000266149	down	BCR-ABL like vs. other subtypes	James et al. 2019
CTD-2134A5.3	ENSG00000258914	down	BCR-ABL like vs. other subtypes	James et al. 2019
CTD-2568A17.1	ENSG00000261341	down	BCR-ABL like vs. other subtypes	James et al. 2019
RP11-166B2.5	ENSG00000261216	down	BCR-ABL like vs. other subtypes	James et al. 2019
RP11-145E17.2	ENSG00000223729	down	BCR-ABL like vs. other subtypes	James et al. 2019
CTD-2350C19.2	ENSG00000265254	down	BCR-ABL like vs. other subtypes	James et al. 2019
CTD-2382E5.1	ENSG00000246740	down	BCR-ABL like vs. other subtypes	James et al. 2019
CTD-2135J3.3	ENSG00000248896	down	BCR-ABL like vs. other subtypes	James et al. 2019
RP11-672A2.5	ENSG00000255363	down	BCR-ABL like vs. other subtypes	James et al. 2019
RP11-1078H9.2	ENSG00000258935	down	BCR-ABL like vs. other subtypes	James et al. 2019
AKT3-IT1	ENSG00000228939	down	BCR-ABL like vs. other subtypes	James et al. 2019
SLC9A9-AS1	ENSG00000240012	down	BCR-ABL like vs. other subtypes	James et al. 2019
AL133493.2	ENSG00000233922	down	BCR-ABL like vs. other subtypes	James et al. 2019
AC002511.3	ENSG00000232680	down	BCR-ABL like vs. other subtypes	James et al. 2019
CTD-2126E3.4	ENSG00000267890	down	BCR-ABL like vs. other subtypes	James et al. 2019
AC002456.2	ENSG00000223969	down	BCR-ABL like vs. other subtypes	James et al. 2019
LINC00937	ENSG00000226091	down	BCR-ABL like vs. other subtypes	James et al. 2019
AC004538.3	ENSG00000230333	down	BCR-ABL like vs. other subtypes	James et al. 2019
LINC00954	ENSG00000228784	down	BCR-ABL like vs. other subtypes	James et al. 2019
RP1-67A8.3	ENSG00000234206	down	BCR-ABL like vs. other subtypes	James et al. 2019
LINC00283	ENSG00000231633	down	BCR-ABL like vs. other subtypes	James et al. 2019
HCG20	ENSG00000228022	down	BCR-ABL like vs. other subtypes	James et al. 2019
CTD-2132N18.2	ENSG00000267221	down	BCR-ABL like vs. other subtypes	James et al. 2019
RP11-443A13.5	ENSG00000236467	down	BCR-ABL like vs. other subtypes	James et al. 2019
LINC00184	ENSG00000224939	down	BCR-ABL like vs. other subtypes	James et al. 2019
RP11-1069G10.1	ENSG00000259370	down	BCR-ABL like vs. other subtypes	James et al. 2019
GS1-24F4.2	ENSG00000245857	down	BCR-ABL like vs. other subtypes	James et al. 2019
AC099754.1	ENSG00000225386	down	BCR-ABL like vs. other subtypes	James et al. 2019
AP000477.2	ENSG00000235564	down	BCR-ABL like vs. other subtypes	James et al. 2019
AC093642.4	ENSG00000226423	down	BCR-ABL like vs. other subtypes	James et al. 2019
AF038458.5	ENSG00000267388	down	BCR-ABL like vs. other subtypes	James et al. 2019
AC091814.3	ENSG00000231560	down	BCR-ABL like vs. other subtypes	James et al. 2019
RP11-395N3.2	ENSG00000272622	down	BCR-ABL like vs. other subtypes	James et al. 2019
RP11-290H9.4	ENSG00000263293	down	BCR-ABL like vs. other subtypes	James et al. 2019
RP11-196E1.3	ENSG00000254561	down	BCR-ABL like vs. other subtypes	James et al. 2019
RP4-583P15.11	ENSG00000231208	down	BCR-ABL like vs. other subtypes	James et al. 2019
CTD-2382E5.4	ENSG00000259883	down	BCR-ABL like vs. other subtypes	James et al. 2019
RP11-575A19.2	ENSG00000238246	down	BCR-ABL like vs. other subtypes	James et al. 2019
RP11-138M12.1	ENSG00000228704	down	BCR-ABL like vs. other subtypes	James et al. 2019
LINC01122	ENSG00000233723	down	BCR-ABL like vs. other subtypes	James et al. 2019
MLLT4-AS1	ENSG00000198221	down	BCR-ABL like vs. other subtypes	James et al. 2019
RP11-367J11.3	ENSG00000245468	down	BCR-ABL like vs. other subtypes	James et al. 2019
CTD-2528A14.1	ENSG00000268985	down	BCR-ABL like vs. other subtypes	James et al. 2019
AF131215.3	ENSG00000254936	down	BCR-ABL like vs. other subtypes	James et al. 2019
AC095067.1	ENSG00000236078	down	BCR-ABL like vs. other subtypes	James et al. 2019
RP11-732A19.6	ENSG00000255410	down	BCR-ABL like vs. other subtypes	James et al. 2019
SLIT2-IT1	ENSG00000248228	down	BCR-ABL like vs. other subtypes	James et al. 2019
RP11-10J21.4	ENSG00000253307	down	BCR-ABL like vs. other subtypes	James et al. 2019
AC007285.7	ENSG00000231519	down	BCR-ABL like vs. other subtypes	James et al. 2019
RP11-141M3.5	ENSG00000273328	down	BCR-ABL like vs. other subtypes	James et al. 2019
CRYM-AS1	ENSG00000189149	down	BCR-ABL like vs. other subtypes	James et al. 2019
RP11-76C10.2	ENSG00000256810	down	BCR-ABL like vs. other subtypes	James et al. 2019
AC004490.1	ENSG00000267122	down	BCR-ABL like vs. other subtypes	James et al. 2019
XXbac-B444P24.8	ENSG00000249923	down	BCR-ABL like vs. other subtypes	James et al. 2019
RP11-72M17.1	ENSG00000258561	down	BCR-ABL like vs. other subtypes	James et al. 2019
RP11-62C7.2	ENSG00000259278	down	BCR-ABL like vs. other subtypes	James et al. 2019
RP11-532F12.5	ENSG00000261183	down	BCR-ABL like vs. other subtypes	James et al. 2019
LINC01006	ENSG00000182648	down	BCR-ABL like vs. other subtypes	James et al. 2019
DNM1P35	ENSG00000246877	down	BCR-ABL like vs. other subtypes	James et al. 2019
RP11-359K18.4	ENSG00000272574	down	BCR-ABL like vs. other subtypes	James et al. 2019
RP11-475I24.3	ENSG00000237357	down	BCR-ABL like vs. other subtypes	James et al. 2019
XKR5	ENSG00000186530	down	BCR-ABL like vs. other subtypes	James et al. 2019
LINC00087	ENSG00000196972	down	BCR-ABL like vs. other subtypes	James et al. 2019
LINC00482	ENSG00000185168	down	BCR-ABL like vs. other subtypes	James et al. 2019
RP11-504I13.3	ENSG00000263982	down	BCR-ABL like vs. other subtypes	James et al. 2019
RP11-13K12.1	ENSG00000267506	down	BCR-ABL like vs. other subtypes	James et al. 2019
RP1-122P22.2	ENSG00000233895	down	BCR-ABL like vs. other subtypes	James et al. 2019
[truncated: 1,380 more rows]
